# Supplementary material
Source: publisher figshare collection journal article supplement (https://acs.figshare.com/ndownloader/files/4002880)
Supplement: Supplementary file 1 [file 4002880]

data_cp_100K_AIMD
_symmetry_space_group_name_H-M    'P1'
_symmetry_Int_Tables_number       1
loop_
_symmetry_equiv_pos_as_xyz
  x,y,z
_cell_length_a                    20.2169
_cell_length_b                    11.3483
_cell_length_c                    14.8722
_cell_angle_alpha                 90.0000
_cell_angle_beta                  90.0000
_cell_angle_gamma                 77.3964
loop_
_atom_site_label
_atom_site_type_symbol
_atom_site_fract_x
_atom_site_fract_y
_atom_site_fract_z
_atom_site_U_iso_or_equiv
_atom_site_adp_type
_atom_site_occupancy
Sc1    Sc    0.99087   0.73552   0.44729   0.00000  Uiso   1.00
Sc2    Sc   -0.00015   0.72846   0.19744   0.00000  Uiso   1.00
Sc3    Sc   -0.00184   0.22677   0.04767   0.00000  Uiso   1.00
Sc4    Sc    0.98757   0.23199   0.29769   0.00000  Uiso   1.00
Sc5    Sc    0.48902   0.74929   0.04150   0.00000  Uiso   1.00
Sc6    Sc    0.49997   0.71388   0.29158   0.00000  Uiso   1.00
Sc7    Sc    0.49937   0.21239   0.44715   0.00000  Uiso   1.00
Sc8    Sc    0.48722   0.24343   0.19747   0.00000  Uiso   1.00
O9     O     0.51480   0.80264   0.41295   0.00000  Uiso   1.00
O10    O     0.47604   0.65921   0.16296   0.00000  Uiso   1.00
O11    O     0.47287   0.15922   0.07456   0.00000  Uiso   1.00
O12    O     0.51386   0.29956   0.32519   0.00000  Uiso   1.00
O13    O     0.39204   0.73863   0.49169   0.00000  Uiso   1.00
O14    O     0.59919   0.72296   0.23962   0.00000  Uiso   1.00
O15    O     0.59684   0.22964  -0.00144   0.00000  Uiso   1.00
O16    O     0.38641   0.24575   0.25224   0.00000  Uiso   1.00
O17    O     0.08916   0.63573   0.48855   0.00000  Uiso   1.00
O18    O     0.90214   0.83194   0.23851   0.00000  Uiso   1.00
O19    O     0.90139   0.33200   0.00668   0.00000  Uiso   1.00
O20    O     0.08574   0.12934   0.25707   0.00000  Uiso   1.00
O21    O     0.01011   0.64361   0.32377   0.00000  Uiso   1.00
O22    O     0.98063   0.82325   0.07479   0.00000  Uiso   1.00
O23    O     0.97763   0.31728   0.17218   0.00000  Uiso   1.00
O24    O     0.00663   0.13712   0.42063   0.00000  Uiso   1.00
O25    O     0.43992   0.41157   0.13854   0.00000  Uiso   1.00
O26    O     0.54554   0.04335   0.38754   0.00000  Uiso   1.00
O27    O     0.54795   0.54345   0.34721   0.00000  Uiso   1.00
O28    O     0.44020   0.91736   0.10092   0.00000  Uiso   1.00
O29    O     0.40967   0.68269   0.34534   0.00000  Uiso   1.00
O30    O     0.58181   0.77752   0.09270   0.00000  Uiso   1.00
O31    O     0.57792   0.27742   0.14650   0.00000  Uiso   1.00
O32    O     0.40594   0.18427   0.39730   0.00000  Uiso   1.00
O33    O     0.08996   0.62819   0.14140   0.00000  Uiso   1.00
O34    O     0.89789   0.83323   0.39188   0.00000  Uiso   1.00
O35    O     0.89753   0.33247   0.35390   0.00000  Uiso   1.00
O36    O     0.08944   0.12784   0.10357   0.00000  Uiso   1.00
O37    O     0.06110   0.84699   0.24851   0.00000  Uiso   1.00
O38    O     0.93025   0.62073  -0.00154   0.00000  Uiso   1.00
O39    O     0.92640   0.11397   0.24587   0.00000  Uiso   1.00
O40    O     0.05718   0.34004   0.49644   0.00000  Uiso   1.00
O41    O     0.03967   0.87228   0.39780   0.00000  Uiso   1.00
O42    O     0.95161   0.58989   0.14755   0.00000  Uiso   1.00
O43    O     0.94796   0.08983   0.09645   0.00000  Uiso   1.00
O44    O     0.03593   0.37105   0.34732   0.00000  Uiso   1.00
O45    O     0.43966   0.39348  -0.01374   0.00000  Uiso   1.00
O46    O     0.54588   0.06697   0.23590   0.00000  Uiso   1.00
O47    O     0.54508   0.57397   0.49833   0.00000  Uiso   1.00
O48    O     0.44036   0.88768   0.25230   0.00000  Uiso   1.00
C49    C     0.41002   0.43018   0.06058   0.00000  Uiso   1.00
C50    C     0.57616   0.02962   0.30957   0.00000  Uiso   1.00
C51    C     0.57658   0.53270   0.42638   0.00000  Uiso   1.00
C52    C     0.41045   0.92929   0.17945   0.00000  Uiso   1.00
C53    C     0.17914   0.85152   0.43873   0.00000  Uiso   1.00
C54    C     0.81247   0.61305   0.18719   0.00000  Uiso   1.00
C55    C     0.80848   0.10954   0.05561   0.00000  Uiso   1.00
C56    C     0.17445   0.35530   0.30837   0.00000  Uiso   1.00
C57    C     0.24876   0.81695   0.45830   0.00000  Uiso   1.00
C58    C     0.74290   0.64694   0.20698   0.00000  Uiso   1.00
C59    C     0.73920   0.14563   0.03493   0.00000  Uiso   1.00
C60    C     0.24398   0.32241   0.28815   0.00000  Uiso   1.00
C61    C     0.30088   0.51119   0.14253   0.00000  Uiso   1.00
C62    C     0.68579   0.95027   0.39213   0.00000  Uiso   1.00
C63    C     0.68757   0.45411   0.34856   0.00000  Uiso   1.00
C64    C     0.30040   0.01147   0.09952   0.00000  Uiso   1.00
C65    C     0.11799   0.61424   0.06297   0.00000  Uiso   1.00
C66    C     0.86974   0.85079   0.31363   0.00000  Uiso   1.00
C67    C     0.86912   0.34711   0.43217   0.00000  Uiso   1.00
C68    C     0.11789   0.11167   0.18175   0.00000  Uiso   1.00
C69    C     0.23261   0.55226   0.47724   0.00000  Uiso   1.00
C70    C     0.75833   0.91381   0.22787   0.00000  Uiso   1.00
C71    C     0.75702   0.41211   0.01524   0.00000  Uiso   1.00
C72    C     0.23049   0.05294   0.26531   0.00000  Uiso   1.00
C73    C     0.19381   0.57146   0.06049   0.00000  Uiso   1.00
C74    C     0.79363   0.89411   0.31075   0.00000  Uiso   1.00
C75    C     0.79320   0.39209   0.43328   0.00000  Uiso   1.00
C76    C     0.19402   0.07039   0.18329   0.00000  Uiso   1.00
C77    C     0.23008   0.55045   0.14267   0.00000  Uiso   1.00
C78    C     0.75672   0.91199   0.39258   0.00000  Uiso   1.00
C79    C     0.75831   0.41418   0.35007   0.00000  Uiso   1.00
C80    C     0.22958   0.05051   0.10050   0.00000  Uiso   1.00
C81    C     0.33615   0.49077   0.05963   0.00000  Uiso   1.00
C82    C     0.65070  -0.02681   0.30919   0.00000  Uiso   1.00
C83    C     0.65082   0.47485   0.43039   0.00000  Uiso   1.00
C84    C     0.33648   0.98892   0.18178   0.00000  Uiso   1.00
C85    C     0.15593   0.83518   0.35016   0.00000  Uiso   1.00
C86    C     0.83562   0.62846   0.09870   0.00000  Uiso   1.00
C87    C     0.83157   0.12770   0.14388   0.00000  Uiso   1.00
C88    C     0.15166   0.33786   0.39672   0.00000  Uiso   1.00
C89    C     0.30333   0.51040   0.47612   0.00000  Uiso   1.00
C90    C     0.68746   0.95331   0.22758   0.00000  Uiso   1.00
C91    C     0.68630   0.45449   0.01449   0.00000  Uiso   1.00
C92    C     0.30125   0.01126   0.26451   0.00000  Uiso   1.00
C93    C     0.08137   0.85496   0.32978   0.00000  Uiso   1.00
C94    C     0.91017   0.60941   0.07948   0.00000  Uiso   1.00
C95    C     0.90623   0.10693   0.16439   0.00000  Uiso   1.00
C96    C     0.07716   0.35318   0.41565   0.00000  Uiso   1.00
C97    C     0.20318   0.78757   0.28198   0.00000  Uiso   1.00
C98    C     0.78841   0.67479   0.03020   0.00000  Uiso   1.00
C99    C     0.78408   0.17734   0.21128   0.00000  Uiso   1.00
C100   C     0.19939   0.29139   0.46468   0.00000  Uiso   1.00
C101   C     0.29595   0.76715   0.39048   0.00000  Uiso   1.00
C102   C     0.69577   0.69537   0.13886   0.00000  Uiso   1.00
C103   C     0.69196   0.19805   0.10180   0.00000  Uiso   1.00
C104   C     0.29164   0.27319   0.35551   0.00000  Uiso   1.00
C105   C     0.27270   0.75341   0.30195   0.00000  Uiso   1.00
C106   C     0.71891   0.70842   0.05016   0.00000  Uiso   1.00
C107   C     0.71472   0.21273   0.19047   0.00000  Uiso   1.00
C108   C     0.26890   0.25853   0.44418   0.00000  Uiso   1.00
C109   C     0.37072   0.72677   0.41115   0.00000  Uiso   1.00
C110   C     0.62075   0.73432   0.15898   0.00000  Uiso   1.00
C111   C     0.61746   0.23758   0.08007   0.00000  Uiso   1.00
C112   C     0.36613   0.23206   0.33312   0.00000  Uiso   1.00
H113   H     0.46408   0.07695   0.07756   0.00000  Uiso   1.00
H114   H     0.52312   0.38135   0.32862   0.00000  Uiso   1.00
H115   H     0.46880   0.57623   0.15797   0.00000  Uiso   1.00
H116   H     0.97081   0.40608   0.17078   0.00000  Uiso   1.00
H117   H     0.97307   0.91219   0.07759   0.00000  Uiso   1.00
H118   H     0.52320   0.88503   0.40794   0.00000  Uiso   1.00
H119   H     0.01590   0.55498   0.32550   0.00000  Uiso   1.00
H120   H     0.01491   0.04806   0.41762   0.00000  Uiso   1.00
H121   H     0.65735   0.96637   0.45475   0.00000  Uiso   1.00
H122   H     0.78422   0.89707   0.45585   0.00000  Uiso   1.00
H123   H     0.78650   0.89719   0.16516   0.00000  Uiso   1.00
H124   H     0.65997   0.97033   0.16429   0.00000  Uiso   1.00
H125   H     0.20409   0.56961   0.41480   0.00000  Uiso   1.00
H126   H     0.33068   0.49326   0.41276   0.00000  Uiso   1.00
H127   H     0.84532   0.07191   0.00393   0.00000  Uiso   1.00
H128   H     0.72128   0.13828  -0.03331   0.00000  Uiso   1.00
H129   H     0.32911   0.49164   0.20508   0.00000  Uiso   1.00
H130   H     0.20216   0.56334   0.20566   0.00000  Uiso   1.00
H131   H     0.80241   0.18812   0.27893   0.00000  Uiso   1.00
H132   H     0.67790   0.25009   0.24208   0.00000  Uiso   1.00
H133   H     0.20307   0.07095   0.32856   0.00000  Uiso   1.00
H134   H     0.32969  -0.00533   0.32708   0.00000  Uiso   1.00
H135   H     0.32799  -0.00606   0.03633   0.00000  Uiso   1.00
H136   H     0.20115   0.06420   0.03792   0.00000  Uiso   1.00
H137   H     0.66034   0.47327   0.28524   0.00000  Uiso   1.00
H138   H     0.78712   0.40143   0.28780   0.00000  Uiso   1.00
H139   H     0.18454   0.77755   0.21437   0.00000  Uiso   1.00
H140   H     0.30928   0.71716   0.24976   0.00000  Uiso   1.00
H141   H     0.14244   0.88693   0.49110   0.00000  Uiso   1.00
H142   H     0.26703   0.82304   0.52652   0.00000  Uiso   1.00
H143   H     0.78462   0.39528   0.07844   0.00000  Uiso   1.00
H144   H     0.65808   0.47270   0.07712   0.00000  Uiso   1.00
H145   H     0.80702   0.68435  -0.03747   0.00000  Uiso   1.00
H146   H     0.68220   0.74355  -0.00211   0.00000  Uiso   1.00
H147   H     0.84924   0.57867   0.23971   0.00000  Uiso   1.00
H148   H     0.72470   0.64138   0.27529   0.00000  Uiso   1.00
H149   H     0.13746   0.38989   0.25614   0.00000  Uiso   1.00
H150   H     0.26178   0.32895   0.21977   0.00000  Uiso   1.00
H151   H     0.18117   0.28005   0.53232   0.00000  Uiso   1.00
H152   H     0.30586   0.22252   0.49599   0.00000  Uiso   1.00
Sc153  Sc    0.98874   0.74102   0.94770   0.00000  Uiso   1.00
Sc154  Sc    0.00131   0.72527   0.69779   0.00000  Uiso   1.00
Sc155  Sc   -0.00106   0.21910   0.54764   0.00000  Uiso   1.00
Sc156  Sc    0.98833   0.23453   0.79718   0.00000  Uiso   1.00
Sc157  Sc    0.49172   0.74865   0.54187   0.00000  Uiso   1.00
Sc158  Sc    0.50124   0.71893   0.79150   0.00000  Uiso   1.00
Sc159  Sc    0.49711   0.21877   0.94667   0.00000  Uiso   1.00
Sc160  Sc    0.48806   0.24899   0.69721   0.00000  Uiso   1.00
O161   O     0.51417   0.80728   0.91387   0.00000  Uiso   1.00
O162   O     0.47781   0.66064   0.66362   0.00000  Uiso   1.00
O163   O     0.47356   0.16008   0.57588   0.00000  Uiso   1.00
O164   O     0.51044   0.30811   0.82527   0.00000  Uiso   1.00
O165   O     0.39098   0.73883   0.98624   0.00000  Uiso   1.00
O166   O     0.60198   0.72226   0.73889   0.00000  Uiso   1.00
O167   O     0.59813   0.22137   0.50148   0.00000  Uiso   1.00
O168   O     0.38643   0.24634   0.74776   0.00000  Uiso   1.00
O169   O     0.08577   0.63637   0.98806   0.00000  Uiso   1.00
O170   O     0.90196   0.82469   0.73747   0.00000  Uiso   1.00
O171   O     0.90100   0.32418   0.50729   0.00000  Uiso   1.00
O172   O     0.08852   0.13584   0.75845   0.00000  Uiso   1.00
O173   O     0.00962   0.64434   0.82504   0.00000  Uiso   1.00
O174   O     0.98128   0.81756   0.57455   0.00000  Uiso   1.00
O175   O     0.97825   0.31591   0.66994   0.00000  Uiso   1.00
O176   O     0.00657   0.14373   0.92125   0.00000  Uiso   1.00
O177   O     0.44408   0.41788   0.63713   0.00000  Uiso   1.00
O178   O     0.54759   0.05073   0.88876   0.00000  Uiso   1.00
O179   O     0.54734   0.55045   0.85113   0.00000  Uiso   1.00
O180   O     0.44329   0.91762   0.60088   0.00000  Uiso   1.00
O181   O     0.40709   0.69144   0.83770   0.00000  Uiso   1.00
O182   O     0.58509   0.77630   0.59188   0.00000  Uiso   1.00
O183   O     0.58085   0.27736   0.64781   0.00000  Uiso   1.00
O184   O     0.40661   0.18449   0.89260   0.00000  Uiso   1.00
O185   O     0.09374   0.62878   0.64196   0.00000  Uiso   1.00
O186   O     0.89820   0.84012   0.89069   0.00000  Uiso   1.00
O187   O     0.89743   0.33323   0.85320   0.00000  Uiso   1.00
O188   O     0.09060   0.12146   0.60543   0.00000  Uiso   1.00
O189   O     0.05736   0.84779   0.75306   0.00000  Uiso   1.00
O190   O     0.93384   0.61299   0.49809   0.00000  Uiso   1.00
O191   O     0.92820   0.11363   0.74732   0.00000  Uiso   1.00
O192   O     0.05834   0.34682   0.99693   0.00000  Uiso   1.00
O193   O     0.03906   0.87895   0.90260   0.00000  Uiso   1.00
O194   O     0.95517   0.58289   0.64723   0.00000  Uiso   1.00
O195   O     0.94982   0.08212   0.59822   0.00000  Uiso   1.00
O196   O     0.03627   0.37230   0.84755   0.00000  Uiso   1.00
O197   O     0.44367   0.38826   0.48600   0.00000  Uiso   1.00
O198   O     0.54751   0.07425   0.73677   0.00000  Uiso   1.00
O199   O     0.54680   0.57406   1.00287   0.00000  Uiso   1.00
O200   O     0.44437   0.89452   0.75263   0.00000  Uiso   1.00
C201   C     0.41392   0.42993   0.55897   0.00000  Uiso   1.00
C202   C     0.57735   0.03511   0.81034   0.00000  Uiso   1.00
C203   C     0.57699   0.53506   0.92955   0.00000  Uiso   1.00
C204   C     0.41355   0.93195   0.67937   0.00000  Uiso   1.00
C205   C     0.17841   0.85425   0.93788   0.00000  Uiso   1.00
C206   C     0.81533   0.60558   0.68612   0.00000  Uiso   1.00
C207   C     0.81119   0.10656   0.55750   0.00000  Uiso   1.00
C208   C     0.17465   0.35606   0.80665   0.00000  Uiso   1.00
C209   C     0.24812   0.81835   0.95595   0.00000  Uiso   1.00
C210   C     0.74576   0.64069   0.70560   0.00000  Uiso   1.00
C211   C     0.74190   0.14261   0.53641   0.00000  Uiso   1.00
C212   C     0.24399   0.32257   0.78547   0.00000  Uiso   1.00
C213   C     0.30515   0.51176   0.64108   0.00000  Uiso   1.00
C214   C     0.68653   0.95143   0.89176   0.00000  Uiso   1.00
C215   C     0.68670   0.45079   0.84953   0.00000  Uiso   1.00
C216   C     0.30269   0.01151   0.60024   0.00000  Uiso   1.00
C217   C     0.12161   0.61424   0.56337   0.00000  Uiso   1.00
C218   C     0.86983   0.84901   0.81235   0.00000  Uiso   1.00
C219   C     0.86919   0.35011   0.93140   0.00000  Uiso   1.00
C220   C     0.12006   0.11224   0.68315   0.00000  Uiso   1.00
C221   C     0.22923   0.55488   0.97779   0.00000  Uiso   1.00
C222   C     0.75822   0.90638   0.72766   0.00000  Uiso   1.00
C223   C     0.75626   0.40954   0.51491   0.00000  Uiso   1.00
C224   C     0.23331   0.05458   0.76655   0.00000  Uiso   1.00
C225   C     0.19756   0.57114   0.56022   0.00000  Uiso   1.00
C226   C     0.79378   0.89005   0.81016   0.00000  Uiso   1.00
C227   C     0.79318   0.39267   0.93312   0.00000  Uiso   1.00
C228   C     0.19644   0.07157   0.68462   0.00000  Uiso   1.00
C229   C     0.23439   0.55135   0.64203   0.00000  Uiso   1.00
C230   C     0.75732   0.91173   0.89219   0.00000  Uiso   1.00
C231   C     0.75747   0.41117   0.85039   0.00000  Uiso   1.00
C232   C     0.23181   0.05047   0.60175   0.00000  Uiso   1.00
C233   C     0.33990   0.48893   0.55787   0.00000  Uiso   1.00
C234   C     0.65126  -0.02621   0.80889   0.00000  Uiso   1.00
C235   C     0.65087   0.47503   0.93181   0.00000  Uiso   1.00
C236   C     0.33920   0.98956   0.68216   0.00000  Uiso   1.00
C237   C     0.15395   0.83962   0.85000   0.00000  Uiso   1.00
C238   C     0.83892   0.62183   0.59801   0.00000  Uiso   1.00
C239   C     0.83374   0.12207   0.64631   0.00000  Uiso   1.00
C240   C     0.15243   0.33836   0.89524   0.00000  Uiso   1.00
C241   C     0.30005   0.51514   0.97767   0.00000  Uiso   1.00
C242   C     0.68748   0.94975   0.72698   0.00000  Uiso   1.00
C243   C     0.68551   0.45202   0.51349   0.00000  Uiso   1.00
C244   C     0.30408   0.01201   0.76510   0.00000  Uiso   1.00
C245   C     0.07921   0.85925   0.83322   0.00000  Uiso   1.00
C246   C     0.91361   0.60243   0.57914   0.00000  Uiso   1.00
C247   C     0.90825   0.10181   0.66654   0.00000  Uiso   1.00
C248   C     0.07800   0.35590   0.91550   0.00000  Uiso   1.00
C249   C     0.19991   0.79264   0.78025   0.00000  Uiso   1.00
C250   C     0.79183   0.66978   0.52967   0.00000  Uiso   1.00
C251   C     0.78605   0.17066   0.71375   0.00000  Uiso   1.00
C252   C     0.20060   0.29060   0.96239   0.00000  Uiso   1.00
C253   C     0.29406   0.76984   0.88662   0.00000  Uiso   1.00
C254   C     0.69865   0.69118   0.63785   0.00000  Uiso   1.00
C255   C     0.69429   0.19279   0.60345   0.00000  Uiso   1.00
C256   C     0.29206   0.27163   0.85190   0.00000  Uiso   1.00
C257   C     0.26964   0.75785   0.79842   0.00000  Uiso   1.00
C258   C     0.72226   0.70471   0.54943   0.00000  Uiso   1.00
C259   C     0.71682   0.20624   0.69247   0.00000  Uiso   1.00
C260   C     0.26992   0.25661   0.94087   0.00000  Uiso   1.00
C261   C     0.36896   0.73074   0.90545   0.00000  Uiso   1.00
C262   C     0.62378   0.73216   0.65827   0.00000  Uiso   1.00
C263   C     0.61970   0.23279   0.58200   0.00000  Uiso   1.00
C264   C     0.36637   0.23193   0.82864   0.00000  Uiso   1.00
H265   H     0.46479   0.07793   0.58029   0.00000  Uiso   1.00
H266   H     0.51987   0.38970   0.82954   0.00000  Uiso   1.00
H267   H     0.46775   0.57944   0.65948   0.00000  Uiso   1.00
H268   H     0.97301   0.40441   0.66672   0.00000  Uiso   1.00
H269   H     0.97229   0.90671   0.57748   0.00000  Uiso   1.00
H270   H     0.52266   0.88961   0.90999   0.00000  Uiso   1.00
H271   H     0.01513   0.55587   0.82857   0.00000  Uiso   1.00
H272   H     0.01449   0.05463   0.91982   0.00000  Uiso   1.00
H273   H     0.65827   0.97005   0.95437   0.00000  Uiso   1.00
H274   H     0.78502   0.89916   0.95534   0.00000  Uiso   1.00
H275   H     0.78623   0.88716   0.66496   0.00000  Uiso   1.00
H276   H     0.65994   0.96624   0.66371   0.00000  Uiso   1.00
H277   H     0.20115   0.57321   0.91506   0.00000  Uiso   1.00
H278   H     0.32785   0.49936   0.91456   0.00000  Uiso   1.00
H279   H     0.84824   0.07059   0.50568   0.00000  Uiso   1.00
H280   H     0.72428   0.13652   0.46785   0.00000  Uiso   1.00
H281   H     0.33376   0.49402   0.70346   0.00000  Uiso   1.00
H282   H     0.20699   0.56567   0.70539   0.00000  Uiso   1.00
H283   H     0.80410   0.18073   0.78167   0.00000  Uiso   1.00
H284   H     0.67984   0.24295   0.74405   0.00000  Uiso   1.00
H285   H     0.20617   0.07271   0.82999   0.00000  Uiso   1.00
H286   H     0.33270  -0.00443   0.82755   0.00000  Uiso   1.00
H287   H     0.33002  -0.00632   0.53688   0.00000  Uiso   1.00
H288   H     0.20317   0.06327   0.53931   0.00000  Uiso   1.00
H289   H     0.65893   0.46778   0.78645   0.00000  Uiso   1.00
H290   H     0.78579   0.39619   0.78776   0.00000  Uiso   1.00
H291   H     0.18012   0.78315   0.71319   0.00000  Uiso   1.00
H292   H     0.30554   0.72276   0.74524   0.00000  Uiso   1.00
H293   H     0.14243   0.88891   0.99121   0.00000  Uiso   1.00
H294   H     0.26739   0.82285   1.02380   0.00000  Uiso   1.00
H295   H     0.78334   0.39074   0.57838   0.00000  Uiso   1.00
H296   H     0.65673   0.46825   0.57583   0.00000  Uiso   1.00
H297   H     0.81064   0.68046   0.46224   0.00000  Uiso   1.00
H298   H     0.68587   0.74107   0.49708   0.00000  Uiso   1.00
H299   H     0.85176   0.56973   0.73869   0.00000  Uiso   1.00
H300   H     0.72739   0.63440   0.77375   0.00000  Uiso   1.00
H301   H     0.13738   0.39197   0.75507   0.00000  Uiso   1.00
H302   H     0.26136   0.33015   0.71698   0.00000  Uiso   1.00
H303   H     0.18283   0.27945   1.03030   0.00000  Uiso   1.00
H304   H     0.30714   0.21978   0.99218   0.00000  Uiso   1.00
#===END of data_cp_100K_AIMD

data_cp_293K_AIMD
_symmetry_space_group_name_H-M    'P1'
_symmetry_Int_Tables_number       1
loop_
_symmetry_equiv_pos_as_xyz
  x,y,z
_cell_length_a                    20.3320
_cell_length_b                    11.4774
_cell_length_c                    14.8866
_cell_angle_alpha                 90.0000
_cell_angle_beta                  90.0000
_cell_angle_gamma                 76.9350
loop_
_atom_site_label
_atom_site_type_symbol
_atom_site_fract_x
_atom_site_fract_y
_atom_site_fract_z
_atom_site_U_iso_or_equiv
_atom_site_adp_type
_atom_site_occupancy
Sc1    Sc    0.99162   0.75255   0.45390   0.00000  Uiso   1.00
Sc2    Sc    0.00305   0.73759   0.20459   0.00000  Uiso   1.00
Sc3    Sc   -0.00036   0.23159   0.04755   0.00000  Uiso   1.00
Sc4    Sc    0.98879   0.25056   0.29701   0.00000  Uiso   1.00
Sc5    Sc    0.49245   0.73638   0.04319   0.00000  Uiso   1.00
Sc6    Sc    0.50125   0.71071   0.29195   0.00000  Uiso   1.00
Sc7    Sc    0.49787   0.21074   0.45294   0.00000  Uiso   1.00
Sc8    Sc    0.48893   0.23663   0.20280   0.00000  Uiso   1.00
O9     O     0.51463   0.79728   0.41390   0.00000  Uiso   1.00
O10    O     0.48102   0.64803   0.16474   0.00000  Uiso   1.00
O11    O     0.47643   0.15009   0.08075   0.00000  Uiso   1.00
O12    O     0.51033   0.29807   0.33053   0.00000  Uiso   1.00
O13    O     0.39380   0.72982   0.49009   0.00000  Uiso   1.00
O14    O     0.60129   0.72123   0.24124   0.00000  Uiso   1.00
O15    O     0.59852   0.21896   0.00435   0.00000  Uiso   1.00
O16    O     0.38934   0.23300   0.25379   0.00000  Uiso   1.00
O17    O     0.08917   0.64673   0.49313   0.00000  Uiso   1.00
O18    O     0.90453   0.84083   0.24269   0.00000  Uiso   1.00
O19    O     0.90243   0.33728   0.00728   0.00000  Uiso   1.00
O20    O     0.08702   0.14408   0.25717   0.00000  Uiso   1.00
O21    O     0.01020   0.65624   0.33129   0.00000  Uiso   1.00
O22    O     0.98547   0.82855   0.08068   0.00000  Uiso   1.00
O23    O     0.98144   0.32943   0.16937   0.00000  Uiso   1.00
O24    O     0.00643   0.15743   0.41976   0.00000  Uiso   1.00
O25    O     0.44248   0.40386   0.14241   0.00000  Uiso   1.00
O26    O     0.54876   0.04193   0.39712   0.00000  Uiso   1.00
O27    O     0.54809   0.54398   0.35165   0.00000  Uiso   1.00
O28    O     0.43979   0.90143   0.10154   0.00000  Uiso   1.00
O29    O     0.40992   0.67873   0.34243   0.00000  Uiso   1.00
O30    O     0.58502   0.76606   0.09261   0.00000  Uiso   1.00
O31    O     0.58091   0.26377   0.15269   0.00000  Uiso   1.00
O32    O     0.40651   0.18155   0.40115   0.00000  Uiso   1.00
O33    O     0.09387   0.63382   0.15116   0.00000  Uiso   1.00
O34    O     0.90160   0.85495   0.39571   0.00000  Uiso   1.00
O35    O     0.89861   0.35294   0.35297   0.00000  Uiso   1.00
O36    O     0.08981   0.12927   0.10412   0.00000  Uiso   1.00
O37    O     0.06138   0.85566   0.25870   0.00000  Uiso   1.00
O38    O     0.93124   0.63233   0.00404   0.00000  Uiso   1.00
O39    O     0.92727   0.13573   0.24681   0.00000  Uiso   1.00
O40    O     0.06056   0.35173   0.49644   0.00000  Uiso   1.00
O41    O     0.04355   0.88610   0.40822   0.00000  Uiso   1.00
O42    O     0.95318   0.60378   0.15320   0.00000  Uiso   1.00
O43    O     0.94927   0.09982   0.09823   0.00000  Uiso   1.00
O44    O     0.03956   0.38236   0.34731   0.00000  Uiso   1.00
O45    O     0.43999   0.38079  -0.00894   0.00000  Uiso   1.00
O46    O     0.54758   0.06353   0.24534   0.00000  Uiso   1.00
O47    O     0.54696   0.56710   0.50331   0.00000  Uiso   1.00
O48    O     0.44001   0.88250   0.25337   0.00000  Uiso   1.00
C49    C     0.41131   0.41973   0.06524   0.00000  Uiso   1.00
C50    C     0.57859   0.02844   0.31883   0.00000  Uiso   1.00
C51    C     0.57771   0.53073   0.42986   0.00000  Uiso   1.00
C52    C     0.41010   0.91967   0.17958   0.00000  Uiso   1.00
C53    C     0.18315   0.85606   0.44320   0.00000  Uiso   1.00
C54    C     0.81528   0.61364   0.19188   0.00000  Uiso   1.00
C55    C     0.81179   0.11432   0.05887   0.00000  Uiso   1.00
C56    C     0.17807   0.35843   0.30812   0.00000  Uiso   1.00
C57    C     0.25256   0.81662   0.46051   0.00000  Uiso   1.00
C58    C     0.74572   0.64473   0.21097   0.00000  Uiso   1.00
C59    C     0.74242   0.14504   0.03847   0.00000  Uiso   1.00
C60    C     0.24724   0.32128   0.28800   0.00000  Uiso   1.00
C61    C     0.30399   0.51291   0.14785   0.00000  Uiso   1.00
C62    C     0.68977   0.95960   0.39879   0.00000  Uiso   1.00
C63    C     0.68759   0.45183   0.35001   0.00000  Uiso   1.00
C64    C     0.29993  -0.00008   0.09996   0.00000  Uiso   1.00
C65    C     0.12084   0.61467   0.07224   0.00000  Uiso   1.00
C66    C     0.87266   0.86348   0.31779   0.00000  Uiso   1.00
C67    C     0.87035   0.36570   0.43125   0.00000  Uiso   1.00
C68    C     0.11854   0.11724   0.18219   0.00000  Uiso   1.00
C69    C     0.23221   0.55616   0.48483   0.00000  Uiso   1.00
C70    C     0.75987   0.91290   0.23397   0.00000  Uiso   1.00
C71    C     0.75802   0.41034   0.01429   0.00000  Uiso   1.00
C72    C     0.23138   0.05640   0.26507   0.00000  Uiso   1.00
C73    C     0.19611   0.56791   0.06865   0.00000  Uiso   1.00
C74    C     0.79640   0.90133   0.31591   0.00000  Uiso   1.00
C75    C     0.79439   0.40491   0.43307   0.00000  Uiso   1.00
C76    C     0.19438   0.07034   0.18355   0.00000  Uiso   1.00
C77    C     0.23350   0.55529   0.14989   0.00000  Uiso   1.00
C78    C     0.76059   0.92451   0.39817   0.00000  Uiso   1.00
C79    C     0.75839   0.41697   0.35063   0.00000  Uiso   1.00
C80    C     0.22941   0.04184   0.10107   0.00000  Uiso   1.00
C81    C     0.33754   0.48077   0.06481   0.00000  Uiso   1.00
C82    C     0.65341   0.97494   0.31669   0.00000  Uiso   1.00
C83    C     0.65210   0.47700   0.43227   0.00000  Uiso   1.00
C84    C     0.33646  -0.01845   0.18179   0.00000  Uiso   1.00
C85    C     0.15822   0.84433   0.35544   0.00000  Uiso   1.00
C86    C     0.83852   0.62770   0.10333   0.00000  Uiso   1.00
C87    C     0.83410   0.13212   0.14722   0.00000  Uiso   1.00
C88    C     0.15492   0.34305   0.39643   0.00000  Uiso   1.00
C89    C     0.30232   0.50932   0.48550   0.00000  Uiso   1.00
C90    C     0.68902   0.95075   0.23436   0.00000  Uiso   1.00
C91    C     0.68733   0.44886   0.01242   0.00000  Uiso   1.00
C92    C     0.30172   0.01081   0.26425   0.00000  Uiso   1.00
C93    C     0.08339   0.86639   0.33881   0.00000  Uiso   1.00
C94    C     0.91221   0.61807   0.08503   0.00000  Uiso   1.00
C95    C     0.90818   0.11878   0.16656   0.00000  Uiso   1.00
C96    C     0.08067   0.36261   0.41552   0.00000  Uiso   1.00
C97    C     0.20327   0.79650   0.28518   0.00000  Uiso   1.00
C98    C     0.79150   0.66705   0.03345   0.00000  Uiso   1.00
C99    C     0.78602   0.17699   0.21497   0.00000  Uiso   1.00
C100   C     0.20179   0.29519   0.46472   0.00000  Uiso   1.00
C101   C     0.29759   0.76646   0.39077   0.00000  Uiso   1.00
C102   C     0.69852   0.68956   0.14180   0.00000  Uiso   1.00
C103   C     0.69451   0.19230   0.10575   0.00000  Uiso   1.00
C104   C     0.29394   0.27024   0.35569   0.00000  Uiso   1.00
C105   C     0.27268   0.75765   0.30271   0.00000  Uiso   1.00
C106   C     0.72202   0.69897   0.05284   0.00000  Uiso   1.00
C107   C     0.71674   0.20734   0.19447   0.00000  Uiso   1.00
C108   C     0.27086   0.25911   0.44448   0.00000  Uiso   1.00
C109   C     0.37194   0.72207   0.40938   0.00000  Uiso   1.00
C110   C     0.62345   0.72802   0.16053   0.00000  Uiso   1.00
C111   C     0.61987   0.22715   0.08531   0.00000  Uiso   1.00
C112   C     0.36800   0.22575   0.33484   0.00000  Uiso   1.00
H113   H     0.01707   0.56842   0.33380   0.00000  Uiso   1.00
H114   H     0.01474   0.06931   0.41800   0.00000  Uiso   1.00
H115   H     0.46570   0.07056   0.08311   0.00000  Uiso   1.00
H116   H     0.52018   0.37821   0.33421   0.00000  Uiso   1.00
H117   H     0.47134   0.56773   0.16114   0.00000  Uiso   1.00
H118   H     0.52393   0.87797   0.41093   0.00000  Uiso   1.00
H119   H     0.97641   0.41685   0.16644   0.00000  Uiso   1.00
H120   H     0.97683   0.91670   0.08211   0.00000  Uiso   1.00
H121   H     0.20464   0.07989   0.32819   0.00000  Uiso   1.00
H122   H     0.33009  -0.00347   0.32685   0.00000  Uiso   1.00
H123   H     0.32694  -0.02264   0.03689   0.00000  Uiso   1.00
H124   H     0.20093   0.05233   0.03864   0.00000  Uiso   1.00
H125   H     0.84892   0.08052   0.00681   0.00000  Uiso   1.00
H126   H     0.72488   0.13713  -0.02976   0.00000  Uiso   1.00
H127   H     0.80377   0.18839   0.28268   0.00000  Uiso   1.00
H128   H     0.67965   0.24126   0.24640   0.00000  Uiso   1.00
H129   H     0.65958   0.46418   0.28710   0.00000  Uiso   1.00
H130   H     0.78498   0.39199   0.07777   0.00000  Uiso   1.00
H131   H     0.78648   0.40080   0.28802   0.00000  Uiso   1.00
H132   H     0.65824   0.46266   0.07448   0.00000  Uiso   1.00
H133   H     0.85196   0.58292   0.24508   0.00000  Uiso   1.00
H134   H     0.72741   0.64033   0.27921   0.00000  Uiso   1.00
H135   H     0.80994   0.67534  -0.03434   0.00000  Uiso   1.00
H136   H     0.68549   0.73038  -0.00027   0.00000  Uiso   1.00
H137   H     0.66215   0.97922   0.46168   0.00000  Uiso   1.00
H138   H     0.78734   0.89369   0.17092   0.00000  Uiso   1.00
H139   H     0.78876   0.91620   0.46082   0.00000  Uiso   1.00
H140   H     0.66087   0.96285   0.17153   0.00000  Uiso   1.00
H141   H     0.14779   0.89169   0.49681   0.00000  Uiso   1.00
H142   H     0.27233   0.81963   0.52809   0.00000  Uiso   1.00
H143   H     0.18300   0.78937   0.21824   0.00000  Uiso   1.00
H144   H     0.30787   0.72132   0.24923   0.00000  Uiso   1.00
H145   H     0.33338   0.50015   0.20969   0.00000  Uiso   1.00
H146   H     0.20525   0.58077   0.42201   0.00000  Uiso   1.00
H147   H     0.20702   0.57593   0.21334   0.00000  Uiso   1.00
H148   H     0.33091   0.49515   0.42307   0.00000  Uiso   1.00
H149   H     0.14159   0.39499   0.25597   0.00000  Uiso   1.00
H150   H     0.26543   0.32685   0.21982   0.00000  Uiso   1.00
H151   H     0.18325   0.28590   0.53233   0.00000  Uiso   1.00
H152   H     0.30726   0.22224   0.49650   0.00000  Uiso   1.00
Sc153  Sc    0.99309   0.74491   0.95469   0.00000  Uiso   1.00
Sc154  Sc    0.00356   0.74272   0.70373   0.00000  Uiso   1.00
Sc155  Sc   -0.00079   0.23734   0.54716   0.00000  Uiso   1.00
Sc156  Sc    0.98846   0.24384   0.79672   0.00000  Uiso   1.00
Sc157  Sc    0.49096   0.74116   0.54216   0.00000  Uiso   1.00
Sc158  Sc    0.50016   0.71228   0.79170   0.00000  Uiso   1.00
Sc159  Sc    0.49990   0.20817   0.95284   0.00000  Uiso   1.00
Sc160  Sc    0.48885   0.23024   0.70305   0.00000  Uiso   1.00
O161   O     0.51129   0.79821   0.91439   0.00000  Uiso   1.00
O162   O     0.47729   0.65451   0.66387   0.00000  Uiso   1.00
O163   O     0.47736   0.14518   0.58009   0.00000  Uiso   1.00
O164   O     0.51085   0.29363   0.83038   0.00000  Uiso   1.00
O165   O     0.39707   0.71506   0.99171   0.00000  Uiso   1.00
O166   O     0.59825   0.72935   0.74116   0.00000  Uiso   1.00
O167   O     0.59413   0.23244   0.50299   0.00000  Uiso   1.00
O168   O     0.39054   0.21869   0.75376   0.00000  Uiso   1.00
O169   O     0.08790   0.63369   0.99778   0.00000  Uiso   1.00
O170   O     0.90683   0.84812   0.74524   0.00000  Uiso   1.00
O171   O     0.90239   0.34517   0.50631   0.00000  Uiso   1.00
O172   O     0.08523   0.13635   0.75516   0.00000  Uiso   1.00
O173   O     0.01377   0.65565   0.82996   0.00000  Uiso   1.00
O174   O     0.98509   0.83473   0.58055   0.00000  Uiso   1.00
O175   O     0.98146   0.32969   0.67057   0.00000  Uiso   1.00
O176   O     0.00633   0.15060   0.91988   0.00000  Uiso   1.00
O177   O     0.43939   0.39819   0.64787   0.00000  Uiso   1.00
O178   O     0.55153   0.04020   0.89755   0.00000  Uiso   1.00
O179   O     0.55103   0.54429   0.84643   0.00000  Uiso   1.00
O180   O     0.43946   0.90749   0.60158   0.00000  Uiso   1.00
O181   O     0.41155   0.67118   0.84257   0.00000  Uiso   1.00
O182   O     0.58211   0.77400   0.59259   0.00000  Uiso   1.00
O183   O     0.57731   0.27072   0.65231   0.00000  Uiso   1.00
O184   O     0.40952   0.17338   0.90195   0.00000  Uiso   1.00
O185   O     0.09282   0.63972   0.64657   0.00000  Uiso   1.00
O186   O     0.90284   0.84865   0.89830   0.00000  Uiso   1.00
O187   O     0.89929   0.34545   0.85386   0.00000  Uiso   1.00
O188   O     0.08903   0.12968   0.60212   0.00000  Uiso   1.00
O189   O     0.06441   0.85474   0.75824   0.00000  Uiso   1.00
O190   O     0.93110   0.64032   0.50828   0.00000  Uiso   1.00
O191   O     0.92381   0.13696   0.74199   0.00000  Uiso   1.00
O192   O     0.06105   0.34472   0.99628   0.00000  Uiso   1.00
O193   O     0.04466   0.87821   0.90798   0.00000  Uiso   1.00
O194   O     0.95146   0.61013   0.65749   0.00000  Uiso   1.00
O195   O     0.94573   0.10710   0.59305   0.00000  Uiso   1.00
O196   O     0.04029   0.37444   0.84717   0.00000  Uiso   1.00
O197   O     0.43993   0.38129   0.49580   0.00000  Uiso   1.00
O198   O     0.55103   0.06253   0.74591   0.00000  Uiso   1.00
O199   O     0.54766   0.56573   0.99836   0.00000  Uiso   1.00
O200   O     0.43934   0.88384   0.75304   0.00000  Uiso   1.00
C201   C     0.41003   0.41732   0.56993   0.00000  Uiso   1.00
C202   C     0.58159   0.02672   0.81962   0.00000  Uiso   1.00
C203   C     0.57912   0.52917   0.92541   0.00000  Uiso   1.00
C204   C     0.40926   0.92187   0.67947   0.00000  Uiso   1.00
C205   C     0.18499   0.83669   0.94609   0.00000  Uiso   1.00
C206   C     0.81240   0.62966   0.69446   0.00000  Uiso   1.00
C207   C     0.80711   0.13105   0.55268   0.00000  Uiso   1.00
C208   C     0.17962   0.33750   0.80708   0.00000  Uiso   1.00
C209   C     0.25440   0.79764   0.96393   0.00000  Uiso   1.00
C210   C     0.74257   0.66045   0.71240   0.00000  Uiso   1.00
C211   C     0.73758   0.16297   0.53337   0.00000  Uiso   1.00
C212   C     0.24882   0.30025   0.78732   0.00000  Uiso   1.00
C213   C     0.30012   0.49619   0.65004   0.00000  Uiso   1.00
C214   C     0.69157   0.94601   0.90012   0.00000  Uiso   1.00
C215   C     0.69000   0.45629   0.84757   0.00000  Uiso   1.00
C216   C     0.29983   0.01113   0.59963   0.00000  Uiso   1.00
C217   C     0.12068   0.62180   0.56823   0.00000  Uiso   1.00
C218   C     0.87455   0.86394   0.82025   0.00000  Uiso   1.00
C219   C     0.87079   0.35790   0.93197   0.00000  Uiso   1.00
C220   C     0.11727   0.11328   0.68029   0.00000  Uiso   1.00
C221   C     0.22983   0.54038   0.98545   0.00000  Uiso   1.00
C222   C     0.76308   0.92302   0.73557   0.00000  Uiso   1.00
C223   C     0.75865   0.42660   0.51531   0.00000  Uiso   1.00
C224   C     0.22856   0.04044   0.76430   0.00000  Uiso   1.00
C225   C     0.19575   0.57046   0.56664   0.00000  Uiso   1.00
C226   C     0.79861   0.90106   0.81794   0.00000  Uiso   1.00
C227   C     0.79501   0.39740   0.93288   0.00000  Uiso   1.00
C228   C     0.19295   0.06631   0.68222   0.00000  Uiso   1.00
C229   C     0.22999   0.54018   0.64925   0.00000  Uiso   1.00
C230   C     0.76240   0.91120   0.90004   0.00000  Uiso   1.00
C231   C     0.76059   0.42006   0.84961   0.00000  Uiso   1.00
C232   C     0.22923   0.05188   0.59999   0.00000  Uiso   1.00
C233   C     0.33657   0.47896   0.56803   0.00000  Uiso   1.00
C234   C     0.65615   0.97282   0.81785   0.00000  Uiso   1.00
C235   C     0.65313   0.47261   0.92922   0.00000  Uiso   1.00
C236   C     0.33514  -0.01926   0.68160   0.00000  Uiso   1.00
C237   C     0.16013   0.82552   0.85809   0.00000  Uiso   1.00
C238   C     0.83625   0.64615   0.60675   0.00000  Uiso   1.00
C239   C     0.83010   0.14463   0.64138   0.00000  Uiso   1.00
C240   C     0.15615   0.32560   0.89574   0.00000  Uiso   1.00
C241   C     0.30009   0.49624   0.98346   0.00000  Uiso   1.00
C242   C     0.69227   0.95954   0.73563   0.00000  Uiso   1.00
C243   C     0.68786   0.46335   0.51478   0.00000  Uiso   1.00
C244   C     0.29902  -0.00336   0.76387   0.00000  Uiso   1.00
C245   C     0.08556   0.85653   0.83961   0.00000  Uiso   1.00
C246   C     0.91071   0.62890   0.58900   0.00000  Uiso   1.00
C247   C     0.90417   0.12603   0.66102   0.00000  Uiso   1.00
C248   C     0.08154   0.35196   0.91507   0.00000  Uiso   1.00
C249   C     0.20534   0.77566   0.78853   0.00000  Uiso   1.00
C250   C     0.78957   0.69061   0.53734   0.00000  Uiso   1.00
C251   C     0.78304   0.18782   0.71050   0.00000  Uiso   1.00
C252   C     0.20291   0.27777   0.96420   0.00000  Uiso   1.00
C253   C     0.29975   0.74822   0.89434   0.00000  Uiso   1.00
C254   C     0.69585   0.70666   0.64332   0.00000  Uiso   1.00
C255   C     0.69064   0.20710   0.60246   0.00000  Uiso   1.00
C256   C     0.29568   0.25183   0.85563   0.00000  Uiso   1.00
C257   C     0.27469   0.73730   0.80650   0.00000  Uiso   1.00
C258   C     0.71995   0.72106   0.55548   0.00000  Uiso   1.00
C259   C     0.71371   0.21907   0.69120   0.00000  Uiso   1.00
C260   C     0.27214   0.24086   0.94429   0.00000  Uiso   1.00
C261   C     0.37435   0.70840   0.91144   0.00000  Uiso   1.00
C262   C     0.62059   0.73908   0.66093   0.00000  Uiso   1.00
C263   C     0.61590   0.23946   0.58388   0.00000  Uiso   1.00
C264   C     0.37004   0.21177   0.83531   0.00000  Uiso   1.00
H265   H     0.01952   0.56806   0.83051   0.00000  Uiso   1.00
H266   H     0.01562   0.06239   0.91785   0.00000  Uiso   1.00
H267   H     0.46778   0.06461   0.58199   0.00000  Uiso   1.00
H268   H     0.51808   0.37564   0.83209   0.00000  Uiso   1.00
H269   H     0.47015   0.57256   0.66051   0.00000  Uiso   1.00
H270   H     0.52032   0.87906   0.91125   0.00000  Uiso   1.00
H271   H     0.97594   0.41723   0.66995   0.00000  Uiso   1.00
H272   H     0.97650   0.92290   0.58194   0.00000  Uiso   1.00
H273   H     0.20084   0.05487   0.82738   0.00000  Uiso   1.00
H274   H     0.32653  -0.02566   0.82657   0.00000  Uiso   1.00
H275   H     0.32794  -0.00103   0.53675   0.00000  Uiso   1.00
H276   H     0.20167   0.07175   0.53721   0.00000  Uiso   1.00
H277   H     0.84397   0.09919   0.49990   0.00000  Uiso   1.00
H278   H     0.71929   0.15814   0.46514   0.00000  Uiso   1.00
H279   H     0.80159   0.19622   0.77821   0.00000  Uiso   1.00
H280   H     0.67701   0.25095   0.74401   0.00000  Uiso   1.00
H281   H     0.66295   0.47633   0.78432   0.00000  Uiso   1.00
H282   H     0.78658   0.41520   0.57831   0.00000  Uiso   1.00
H283   H     0.78970   0.41060   0.78773   0.00000  Uiso   1.00
H284   H     0.65977   0.48266   0.57732   0.00000  Uiso   1.00
H285   H     0.84859   0.59648   0.74771   0.00000  Uiso   1.00
H286   H     0.72374   0.65301   0.78005   0.00000  Uiso   1.00
H287   H     0.80866   0.70113   0.47022   0.00000  Uiso   1.00
H288   H     0.68383   0.75409   0.50224   0.00000  Uiso   1.00
H289   H     0.66326   0.95675   0.96283   0.00000  Uiso   1.00
H290   H     0.79117   0.91198   0.67273   0.00000  Uiso   1.00
H291   H     0.79019   0.89394   0.96284   0.00000  Uiso   1.00
H292   H     0.66451   0.97931   0.67289   0.00000  Uiso   1.00
H293   H     0.14949   0.87287   0.99943   0.00000  Uiso   1.00
H294   H     0.27383   0.80121   1.03169   0.00000  Uiso   1.00
H295   H     0.18536   0.76810   0.72148   0.00000  Uiso   1.00
H296   H     0.30996   0.70048   0.75320   0.00000  Uiso   1.00
H297   H     0.32730   0.47163   0.71273   0.00000  Uiso   1.00
H298   H     0.20066   0.55398   0.92350   0.00000  Uiso   1.00
H299   H     0.20129   0.55100   0.71151   0.00000  Uiso   1.00
H300   H     0.32650   0.47295   0.92012   0.00000  Uiso   1.00
H301   H     0.14319   0.37221   0.75444   0.00000  Uiso   1.00
H302   H     0.26694   0.30393   0.71890   0.00000  Uiso   1.00
H303   H     0.18425   0.26981   1.03194   0.00000  Uiso   1.00
H304   H     0.30840   0.20516   0.99680   0.00000  Uiso   1.00
#===END of data_cp_293K_AIMD

data_vnp_623K_AIMD
_symmetry_space_group_name_H-M    'P1'
_symmetry_Int_Tables_number       1
loop_
_symmetry_equiv_pos_as_xyz
  x,y,z
_cell_length_a                    20.0387
_cell_length_b                    13.1203
_cell_length_c                    14.8404
_cell_angle_alpha                 89.5808
_cell_angle_beta                  90.3591
_cell_angle_gamma                 90.2487
loop_
_atom_site_label
_atom_site_type_symbol
_atom_site_fract_x
_atom_site_fract_y
_atom_site_fract_z
_atom_site_U_iso_or_equiv
_atom_site_adp_type
_atom_site_occupancy
C1     C     0.32867   0.24667   0.31120   0.00000  Uiso   1.00
C2     C     0.29279   0.23774   0.39315   0.00000  Uiso   1.00
C3     C     0.22274   0.23009   0.39164   0.00000  Uiso   1.00
C4     C     0.40284   0.26466   0.31314   0.00000  Uiso   1.00
C5     C     0.18760   0.22962   0.30818   0.00000  Uiso   1.00
C6     C     0.22345   0.23715   0.22615   0.00000  Uiso   1.00
C7     C     0.29339   0.24654   0.22774   0.00000  Uiso   1.00
C8     C     0.11264   0.21635   0.30723   0.00000  Uiso   1.00
C9     C     0.68629   0.28505   0.31419   0.00000  Uiso   1.00
C10    C     0.71853   0.27026   0.23038   0.00000  Uiso   1.00
C11    C     0.78838   0.26180   0.22762   0.00000  Uiso   1.00
C12    C     0.61175   0.29766   0.31772   0.00000  Uiso   1.00
C13    C     0.82635   0.26819   0.30854   0.00000  Uiso   1.00
C14    C     0.79422   0.28498   0.39199   0.00000  Uiso   1.00
C15    C     0.72443   0.29327   0.39459   0.00000  Uiso   1.00
C16    C     0.89996   0.24714   0.30724   0.00000  Uiso   1.00
C17    C     0.81266   0.52577   0.08578   0.00000  Uiso   1.00
C18    C     0.77446   0.52258   0.16587   0.00000  Uiso   1.00
C19    C     0.70444   0.52182   0.16032   0.00000  Uiso   1.00
C20    C     0.88772   0.53036   0.09000   0.00000  Uiso   1.00
C21    C     0.67219   0.52391   0.07475   0.00000  Uiso   1.00
C22    C     0.71036   0.52922  -0.00529   0.00000  Uiso   1.00
C23    C     0.78035   0.53007   0.00029   0.00000  Uiso   1.00
C24    C     0.59769   0.51074   0.06981   0.00000  Uiso   1.00
C25    C     0.17315   0.49628   0.08396   0.00000  Uiso   1.00
C26    C     0.20366   0.49232  -0.00207   0.00000  Uiso   1.00
C27    C     0.27357   0.49025  -0.00839   0.00000  Uiso   1.00
C28    C     0.09887   0.50695   0.09045   0.00000  Uiso   1.00
C29    C     0.31310   0.49211   0.07127   0.00000  Uiso   1.00
C30    C     0.28246   0.49625   0.15723   0.00000  Uiso   1.00
C31    C     0.21264   0.49806   0.16360   0.00000  Uiso   1.00
C32    C     0.38775   0.48357   0.06618   0.00000  Uiso   1.00
H33    H     0.49128   0.53804   0.31880   0.00000  Uiso   1.00
H34    H     0.50702   0.24212   0.06854   0.00000  Uiso   1.00
H35    H     0.99412  -0.02386   0.31905   0.00000  Uiso   1.00
H36    H     1.00653   0.27204   0.06562   0.00000  Uiso   1.00
H37    H     0.32024   0.23842   0.45677   0.00000  Uiso   1.00
H38    H     0.19468   0.22424   0.45409   0.00000  Uiso   1.00
H39    H     0.19604   0.23591   0.16252   0.00000  Uiso   1.00
H40    H     0.32138   0.25404   0.16532   0.00000  Uiso   1.00
H41    H     0.17217   0.49236  -0.06219   0.00000  Uiso   1.00
H42    H     0.29816   0.48743  -0.07358   0.00000  Uiso   1.00
H43    H     0.31381   0.49741   0.21743   0.00000  Uiso   1.00
H44    H     0.18809   0.50186   0.22876   0.00000  Uiso   1.00
H45    H     0.68851   0.26535   0.16910   0.00000  Uiso   1.00
H46    H     0.81402   0.24857   0.16428   0.00000  Uiso   1.00
H47    H     0.82423   0.28976   0.45330   0.00000  Uiso   1.00
H48    H     0.69875   0.30523   0.45807   0.00000  Uiso   1.00
H49    H     0.80006   0.52010   0.23083   0.00000  Uiso   1.00
H50    H     0.67408   0.51775   0.22088   0.00000  Uiso   1.00
H51    H     0.68472   0.53096  -0.07026   0.00000  Uiso   1.00
H52    H     0.81063   0.53377  -0.06032   0.00000  Uiso   1.00
O53    O     1.00249   0.19768   0.06340   0.00000  Uiso   1.00
O54    O     0.99310   0.05063   0.31512   0.00000  Uiso   1.00
O55    O     0.50449   0.31665   0.06762   0.00000  Uiso   1.00
O56    O     0.49479   0.46362   0.31855   0.00000  Uiso   1.00
O57    O     0.43309   0.27087   0.39012   0.00000  Uiso   1.00
O58    O     0.43246   0.27713   0.23683   0.00000  Uiso   1.00
O59    O     0.08293   0.20351   0.23086   0.00000  Uiso   1.00
O60    O     0.08239   0.21631   0.38386   0.00000  Uiso   1.00
O61    O     0.06474   0.51031   0.01641   0.00000  Uiso   1.00
O62    O     0.93169   0.24323   0.38325   0.00000  Uiso   1.00
O63    O     0.91829   0.53639   0.01406   0.00000  Uiso   1.00
O64    O     0.07288   0.51603   0.16924   0.00000  Uiso   1.00
O65    O     0.58011   0.30393   0.24203   0.00000  Uiso   1.00
O66    O     0.58405   0.30420   0.39578   0.00000  Uiso   1.00
O67    O     0.92731   0.22976   0.23053   0.00000  Uiso   1.00
O68    O     0.91724   0.53075   0.16766   0.00000  Uiso   1.00
O69    O     0.56899   0.50297  -0.00796   0.00000  Uiso   1.00
O70    O     0.56642   0.50342   0.14545   0.00000  Uiso   1.00
O71    O     0.42011   0.48105   0.14156   0.00000  Uiso   1.00
O72    O     0.41525   0.47613  -0.01183   0.00000  Uiso   1.00
Sc73   Sc    0.49908   0.39149  -0.05748   0.00000  Uiso   1.00
Sc74   Sc    0.49909   0.39162   0.19229   0.00000  Uiso   1.00
Sc75   Sc    1.00014   0.13332   0.43614   0.00000  Uiso   1.00
Sc76   Sc    0.99661   0.11893   0.18692   0.00000  Uiso   1.00
C77    C     0.32722   0.74858   0.34585   0.00000  Uiso   1.00
C78    C     0.29396   0.73741   0.42967   0.00000  Uiso   1.00
C79    C     0.22420   0.72447   0.43175   0.00000  Uiso   1.00
C80    C     0.40106   0.77159   0.34309   0.00000  Uiso   1.00
C81    C     0.18682   0.72297   0.35005   0.00000  Uiso   1.00
C82    C     0.22026   0.73299   0.26628   0.00000  Uiso   1.00
C83    C     0.29000   0.74528   0.26415   0.00000  Uiso   1.00
C84    C     0.11215   0.70635   0.35087   0.00000  Uiso   1.00
C85    C     0.68720   0.78602   0.33576   0.00000  Uiso   1.00
C86    C     0.72193   0.77268   0.25361   0.00000  Uiso   1.00
C87    C     0.79173   0.76146   0.25440   0.00000  Uiso   1.00
C88    C     0.61253   0.80065   0.33576   0.00000  Uiso   1.00
C89    C     0.82752   0.76210   0.33735   0.00000  Uiso   1.00
C90    C     0.79293   0.77690   0.41943   0.00000  Uiso   1.00
C91    C     0.72324   0.78927   0.41857   0.00000  Uiso   1.00
C92    C     0.90105   0.73817   0.33831   0.00000  Uiso   1.00
C93    C     0.80997   1.02905   0.06498   0.00000  Uiso   1.00
C94    C     0.77956   1.01376   0.15035   0.00000  Uiso   1.00
C95    C     0.70961   1.01230   0.15760   0.00000  Uiso   1.00
C96    C     0.88500   1.03455   0.05902   0.00000  Uiso   1.00
C97    C     0.66940   1.02613   0.07947   0.00000  Uiso   1.00
C98    C     0.69980   1.04267  -0.00578   0.00000  Uiso   1.00
C99    C     0.76973   1.04399  -0.01301   0.00000  Uiso   1.00
C100   C     0.59478   1.01376   0.08515   0.00000  Uiso   1.00
C101   C     0.16883   0.99327   0.07209   0.00000  Uiso   1.00
C102   C     0.20666   0.99883  -0.00831   0.00000  Uiso   1.00
C103   C     0.27666   0.99636  -0.00367   0.00000  Uiso   1.00
C104   C     0.09410   1.00375   0.06731   0.00000  Uiso   1.00
C105   C     0.30908   0.98826   0.08141   0.00000  Uiso   1.00
C106   C     0.27120   0.98266   0.16180   0.00000  Uiso   1.00
C107   C     0.20119   0.98483   0.15720   0.00000  Uiso   1.00
C108   C     0.38378   0.97902   0.08560   0.00000  Uiso   1.00
H109   H     0.49193   1.04377   0.33263   0.00000  Uiso   1.00
H110   H     0.51163   0.74467   0.08443   0.00000  Uiso   1.00
H111   H     0.98146   0.46419   0.34025   0.00000  Uiso   1.00
H112   H     0.99946   0.77031   0.09441   0.00000  Uiso   1.00
H113   H     0.32312   0.74029   0.49186   0.00000  Uiso   1.00
H114   H     0.19810   0.71580   0.49558   0.00000  Uiso   1.00
H115   H     0.19109   0.73113   0.20412   0.00000  Uiso   1.00
H116   H     0.31612   0.75387   0.20036   0.00000  Uiso   1.00
H117   H     0.18064   1.00572  -0.07274   0.00000  Uiso   1.00
H118   H     0.30671   0.99988  -0.06453   0.00000  Uiso   1.00
H119   H     0.29721   0.97644   0.22626   0.00000  Uiso   1.00
H120   H     0.17107   0.98132   0.21802   0.00000  Uiso   1.00
H121   H     0.69383   0.77092   0.19054   0.00000  Uiso   1.00
H122   H     0.81897   0.74995   0.19201   0.00000  Uiso   1.00
H123   H     0.82096   0.77718   0.48261   0.00000  Uiso   1.00
H124   H     0.69604   0.80069   0.48099   0.00000  Uiso   1.00
H125   H     0.81116   1.00331   0.20967   0.00000  Uiso   1.00
H126   H     0.68556   0.99963   0.22239   0.00000  Uiso   1.00
H127   H     0.66815   1.05283  -0.06511   0.00000  Uiso   1.00
H128   H     0.79377   1.05618  -0.07788   0.00000  Uiso   1.00
O129   O     1.00290   0.69589   0.09244   0.00000  Uiso   1.00
O130   O     0.98951   0.53789   0.34094   0.00000  Uiso   1.00
O131   O     0.50081   0.81737   0.08579   0.00000  Uiso   1.00
O132   O     0.49552   0.96936   0.33398   0.00000  Uiso   1.00
O133   O     0.43255   0.78316   0.41849   0.00000  Uiso   1.00
O134   O     0.42879   0.78259   0.26526   0.00000  Uiso   1.00
O135   O     0.08159   0.70213   0.27419   0.00000  Uiso   1.00
O136   O     0.08268   0.69550   0.42739   0.00000  Uiso   1.00
O137   O     0.06566   1.01669  -0.01020   0.00000  Uiso   1.00
O138   O     0.93024   0.72356   0.41501   0.00000  Uiso   1.00
O139   O     0.91256   1.04450  -0.01884   0.00000  Uiso   1.00
O140   O     0.06183   1.00363   0.14230   0.00000  Uiso   1.00
O141   O     0.58104   0.80381   0.25951   0.00000  Uiso   1.00
O142   O     0.58422   0.81094   0.41293   0.00000  Uiso   1.00
O143   O     0.93099   0.72965   0.26201   0.00000  Uiso   1.00
O144   O     0.91768   1.03105   0.13431   0.00000  Uiso   1.00
O145   O     0.56211   1.01044   0.00983   0.00000  Uiso   1.00
O146   O     0.56726   1.00255   0.16296   0.00000  Uiso   1.00
O147   O     0.41193   0.97042   0.16357   0.00000  Uiso   1.00
O148   O     0.41527   0.97726   0.01012   0.00000  Uiso   1.00
Sc149  Sc    0.49726   0.89628  -0.03944   0.00000  Uiso   1.00
Sc150  Sc    0.49768   0.89014   0.21139   0.00000  Uiso   1.00
Sc151  Sc    0.99587   0.61018   0.46664   0.00000  Uiso   1.00
Sc152  Sc    0.99999   0.61776   0.21803   0.00000  Uiso   1.00
C153   C     0.32730   0.25177   0.81725   0.00000  Uiso   1.00
C154   C     0.29231   0.24783   0.90013   0.00000  Uiso   1.00
C155   C     0.22225   0.24005   0.89986   0.00000  Uiso   1.00
C156   C     0.40158   0.26882   0.81623   0.00000  Uiso   1.00
C157   C     0.18704   0.23679   0.81638   0.00000  Uiso   1.00
C158   C     0.22217   0.24005   0.73346   0.00000  Uiso   1.00
C159   C     0.29204   0.24758   0.73403   0.00000  Uiso   1.00
C160   C     0.11226   0.22494   0.81538   0.00000  Uiso   1.00
C161   C     0.68748   0.28970   0.81611   0.00000  Uiso   1.00
C162   C     0.72013   0.27503   0.73259   0.00000  Uiso   1.00
C163   C     0.78994   0.26545   0.73003   0.00000  Uiso   1.00
C164   C     0.61279   0.30357   0.81837   0.00000  Uiso   1.00
C165   C     0.82788   0.27077   0.81100   0.00000  Uiso   1.00
C166   C     0.79546   0.28662   0.89449   0.00000  Uiso   1.00
C167   C     0.72557   0.29570   0.89701   0.00000  Uiso   1.00
C168   C     0.90188   0.25188   0.80961   0.00000  Uiso   1.00
C169   C     0.80861   0.52403   0.58630   0.00000  Uiso   1.00
C170   C     0.77035   0.52337   0.66635   0.00000  Uiso   1.00
C171   C     0.70036   0.52425   0.66059   0.00000  Uiso   1.00
C172   C     0.88355   0.52520   0.59075   0.00000  Uiso   1.00
C173   C     0.66837   0.52569   0.57487   0.00000  Uiso   1.00
C174   C     0.70664   0.52908   0.49484   0.00000  Uiso   1.00
C175   C     0.77659   0.52837   0.50061   0.00000  Uiso   1.00
C176   C     0.59387   0.51297   0.56966   0.00000  Uiso   1.00
C177   C     0.16981   0.48662   0.58567   0.00000  Uiso   1.00
C178   C     0.19987   0.47332   0.50001   0.00000  Uiso   1.00
C179   C     0.26963   0.47153   0.49244   0.00000  Uiso   1.00
C180   C     0.09516   0.49728   0.59264   0.00000  Uiso   1.00
C181   C     0.31005   0.48310   0.57055   0.00000  Uiso   1.00
C182   C     0.28017   0.49631   0.65620   0.00000  Uiso   1.00
C183   C     0.21032   0.49791   0.66377   0.00000  Uiso   1.00
C184   C     0.38471   0.47488   0.56386   0.00000  Uiso   1.00
H185   H     0.48778   0.53941   0.81627   0.00000  Uiso   1.00
H186   H     0.51108   0.24106   0.57085   0.00000  Uiso   1.00
H187   H     0.99276  -0.01753   0.80827   0.00000  Uiso   1.00
H188   H     1.00910   0.28450   0.55850   0.00000  Uiso   1.00
H189   H     0.32046   0.25167   0.96310   0.00000  Uiso   1.00
H190   H     0.19432   0.23685   0.96256   0.00000  Uiso   1.00
H191   H     0.19413   0.23699   0.67042   0.00000  Uiso   1.00
H192   H     0.31995   0.25104   0.67134   0.00000  Uiso   1.00
H193   H     0.16785   0.46537   0.44082   0.00000  Uiso   1.00
H194   H     0.29344   0.46163   0.42733   0.00000  Uiso   1.00
H195   H     0.31209   0.50438   0.71544   0.00000  Uiso   1.00
H196   H     0.18649   0.50858   0.72879   0.00000  Uiso   1.00
H197   H     0.69039   0.27148   0.67097   0.00000  Uiso   1.00
H198   H     0.81564   0.25309   0.66658   0.00000  Uiso   1.00
H199   H     0.82526   0.29022   0.95606   0.00000  Uiso   1.00
H200   H     0.69984   0.30705   0.96055   0.00000  Uiso   1.00
H201   H     0.79589   0.52115   0.73135   0.00000  Uiso   1.00
H202   H     0.66982   0.52199   0.72103   0.00000  Uiso   1.00
H203   H     0.68108   0.53051   0.42982   0.00000  Uiso   1.00
H204   H     0.80703   0.53035   0.44010   0.00000  Uiso   1.00
O205   O     1.00662   0.20984   0.56001   0.00000  Uiso   1.00
O206   O     0.99736   0.05669   0.81119   0.00000  Uiso   1.00
O207   O     0.50477   0.31506   0.56874   0.00000  Uiso   1.00
O208   O     0.49113   0.46496   0.81750   0.00000  Uiso   1.00
O209   O     0.43314   0.27718   0.89205   0.00000  Uiso   1.00
O210   O     0.42976   0.27764   0.73865   0.00000  Uiso   1.00
O211   O     0.08231   0.22241   0.73817   0.00000  Uiso   1.00
O212   O     0.08229   0.21582   0.89173   0.00000  Uiso   1.00
O213   O     0.06052   0.49660   0.51882   0.00000  Uiso   1.00
O214   O     0.93258   0.24257   0.88600   0.00000  Uiso   1.00
O215   O     0.91449   0.52388   0.51470   0.00000  Uiso   1.00
O216   O     0.06911   0.51057   0.67084   0.00000  Uiso   1.00
O217   O     0.58138   0.31003   0.74230   0.00000  Uiso   1.00
O218   O     0.58451   0.31048   0.89589   0.00000  Uiso   1.00
O219   O     0.93066   0.24270   0.73254   0.00000  Uiso   1.00
O220   O     0.91291   0.53022   0.66824   0.00000  Uiso   1.00
O221   O     0.56607   0.50146   0.49171   0.00000  Uiso   1.00
O222   O     0.56198   0.50919   0.64500   0.00000  Uiso   1.00
O223   O     0.41850   0.47657   0.63807   0.00000  Uiso   1.00
O224   O     0.41102   0.46341   0.48559   0.00000  Uiso   1.00
Sc225  Sc    0.49872   0.38604   0.44188   0.00000  Uiso   1.00
Sc226  Sc    0.49790   0.39177   0.69211   0.00000  Uiso   1.00
Sc227  Sc    0.99922   0.12799   0.93663   0.00000  Uiso   1.00
Sc228  Sc    1.00123   0.13538   0.68659   0.00000  Uiso   1.00
C229   C     0.32503   0.75848   0.83075   0.00000  Uiso   1.00
C230   C     0.29171   0.75107   0.91466   0.00000  Uiso   1.00
C231   C     0.22207   0.73992   0.91674   0.00000  Uiso   1.00
C232   C     0.39895   0.77938   0.82990   0.00000  Uiso   1.00
C233   C     0.18458   0.73541   0.83524   0.00000  Uiso   1.00
C234   C     0.21798   0.74262   0.75123   0.00000  Uiso   1.00
C235   C     0.28786   0.75414   0.74902   0.00000  Uiso   1.00
C236   C     0.11003   0.71742   0.83830   0.00000  Uiso   1.00
C237   C     0.68516   0.78836   0.84159   0.00000  Uiso   1.00
C238   C     0.71895   0.77564   0.75862   0.00000  Uiso   1.00
C239   C     0.78862   0.76340   0.75794   0.00000  Uiso   1.00
C240   C     0.61054   0.80357   0.84166   0.00000  Uiso   1.00
C241   C     0.82529   0.76360   0.84020   0.00000  Uiso   1.00
C242   C     0.79162   0.77743   0.92310   0.00000  Uiso   1.00
C243   C     0.72191   0.78981   0.92379   0.00000  Uiso   1.00
C244   C     0.89901   0.74109   0.83903   0.00000  Uiso   1.00
C245   C     0.81449   1.03182   0.56928   0.00000  Uiso   1.00
C246   C     0.78324   1.01720   0.65408   0.00000  Uiso   1.00
C247   C     0.71324   1.01549   0.65965   0.00000  Uiso   1.00
C248   C     0.88928   1.04150   0.56457   0.00000  Uiso   1.00
C249   C     0.67398   1.02798   0.58043   0.00000  Uiso   1.00
C250   C     0.70522   1.04259   0.49559   0.00000  Uiso   1.00
C251   C     0.77521   1.04441   0.49005   0.00000  Uiso   1.00
C252   C     0.59937   1.01653   0.58503   0.00000  Uiso   1.00
C253   C     0.17328   0.99829   0.56756   0.00000  Uiso   1.00
C254   C     0.21072   0.99378   0.48685   0.00000  Uiso   1.00
C255   C     0.28076   0.99033   0.49118   0.00000  Uiso   1.00
C256   C     0.09903   1.01491   0.56420   0.00000  Uiso   1.00
C257   C     0.31381   0.99147   0.57615   0.00000  Uiso   1.00
C258   C     0.27637   0.99386   0.65689   0.00000  Uiso   1.00
C259   C     0.20636   0.99701   0.65258   0.00000  Uiso   1.00
C260   C     0.38877   0.98619   0.58009   0.00000  Uiso   1.00
H261   H     0.49496   1.04856   0.83688   0.00000  Uiso   1.00
H262   H     0.50856   0.74912   0.58851   0.00000  Uiso   1.00
H263   H     0.99110   0.46956   0.84604   0.00000  Uiso   1.00
H264   H     1.00430   0.76292   0.58782   0.00000  Uiso   1.00
H265   H     0.32080   0.75536   0.97678   0.00000  Uiso   1.00
H266   H     0.19582   0.73426   0.98066   0.00000  Uiso   1.00
H267   H     0.18884   0.73887   0.68909   0.00000  Uiso   1.00
H268   H     0.31412   0.76070   0.68514   0.00000  Uiso   1.00
H269   H     0.18451   0.99484   0.42229   0.00000  Uiso   1.00
H270   H     0.31048   0.98757   0.43006   0.00000  Uiso   1.00
H271   H     0.30261   0.99391   0.72141   0.00000  Uiso   1.00
H272   H     0.17670   1.00055   0.71374   0.00000  Uiso   1.00
H273   H     0.69016   0.77493   0.69611   0.00000  Uiso   1.00
H274   H     0.81516   0.75221   0.69495   0.00000  Uiso   1.00
H275   H     0.82038   0.77709   0.98567   0.00000  Uiso   1.00
H276   H     0.69535   0.80035   0.98685   0.00000  Uiso   1.00
H277   H     0.81418   1.00814   0.71423   0.00000  Uiso   1.00
H278   H     0.68837   1.00360   0.72398   0.00000  Uiso   1.00
H279   H     0.67424   1.05147   0.43546   0.00000  Uiso   1.00
H280   H     0.80007   1.05587   0.42567   0.00000  Uiso   1.00
O281   O     0.99819   0.68891   0.59027   0.00000  Uiso   1.00
O282   O     0.99327   0.54408   0.84243   0.00000  Uiso   1.00
O283   O     0.50884   0.82376   0.58691   0.00000  Uiso   1.00
O284   O     0.49529   0.97394   0.83563   0.00000  Uiso   1.00
O285   O     0.42895   0.78941   0.90654   0.00000  Uiso   1.00
O286   O     0.42839   0.78992   0.75327   0.00000  Uiso   1.00
O287   O     0.07796   0.70897   0.76311   0.00000  Uiso   1.00
O288   O     0.08243   0.70903   0.91643   0.00000  Uiso   1.00
O289   O     0.06967   1.02361   0.48682   0.00000  Uiso   1.00
O290   O     0.93025   0.73078   0.91483   0.00000  Uiso   1.00
O291   O     0.91678   1.05011   0.48661   0.00000  Uiso   1.00
O292   O     0.06879   1.02398   0.64024   0.00000  Uiso   1.00
O293   O     0.58027   0.81073   0.76486   0.00000  Uiso   1.00
O294   O     0.58104   0.81041   0.91847   0.00000  Uiso   1.00
O295   O     0.92695   0.72901   0.76181   0.00000  Uiso   1.00
O296   O     0.92175   1.04367   0.63991   0.00000  Uiso   1.00
O297   O     0.56701   1.01048   0.50967   0.00000  Uiso   1.00
O298   O     0.57144   1.00914   0.66298   0.00000  Uiso   1.00
O299   O     0.41770   0.98321   0.65799   0.00000  Uiso   1.00
O300   O     0.41990   0.98282   0.50444   0.00000  Uiso   1.00
Sc301  Sc    0.50211   0.89662   0.46034   0.00000  Uiso   1.00
Sc302  Sc    0.50043   0.89984   0.71067   0.00000  Uiso   1.00
Sc303  Sc    0.99966   0.62342   0.96591   0.00000  Uiso   1.00
Sc304  Sc    0.99606   0.61686   0.71673   0.00000  Uiso   1.00
#===END of data_vnp_623K_AIMD

data_int(2.2)_AIMD
_symmetry_space_group_name_H-M    'P1'
_symmetry_Int_Tables_number       1
loop_
_symmetry_equiv_pos_as_xyz
  x,y,z
_cell_length_a                    20.6584
_cell_length_b                    21.2114
_cell_length_c                    14.8265
_cell_angle_alpha                 92.0548
_cell_angle_beta                  88.3351
_cell_angle_gamma                 38.0506
loop_
_atom_site_label
_atom_site_type_symbol
_atom_site_fract_x
_atom_site_fract_y
_atom_site_fract_z
_atom_site_U_iso_or_equiv
_atom_site_adp_type
_atom_site_occupancy
Sc1    Sc    0.67598   0.32073   0.40633   0.00000  Uiso   1.00
Sc2    Sc    0.67271   0.32702   0.15326   0.00000  Uiso   1.00
O3     O     0.74419   0.18685   0.19108   0.00000  Uiso   1.00
O4     O     0.75713   0.17810   0.34277   0.00000  Uiso   1.00
C5     C     0.73618   0.16567   0.26709   0.00000  Uiso   1.00
C6     C     0.70139   0.12484   0.27108   0.00000  Uiso   1.00
C7     C     0.68895   0.10493   0.35600   0.00000  Uiso   1.00
H8     H     0.70133   0.12325   0.41730   0.00000  Uiso   1.00
C9     C     0.66333   0.06021   0.35957   0.00000  Uiso   1.00
H10    H     0.65537   0.04278   0.42390   0.00000  Uiso   1.00
C11    C     0.65143   0.03360   0.27839   0.00000  Uiso   1.00
C12    C     0.65713   0.05964   0.19440   0.00000  Uiso   1.00
H13    H     0.64657   0.03998   0.13267   0.00000  Uiso   1.00
C14    C     0.68136   0.10565   0.19077   0.00000  Uiso   1.00
H15    H     0.68818   0.12420   0.12657   0.00000  Uiso   1.00
C16    C     0.64182  -0.02978   0.28038   0.00000  Uiso   1.00
O17    O     0.63911  -0.05384   0.35795   0.00000  Uiso   1.00
O18    O     0.64098  -0.05990   0.20379   0.00000  Uiso   1.00
O19    O     0.75122   0.25906   0.02382   0.00000  Uiso   1.00
O20    O     0.59906   0.38617   0.28647   0.00000  Uiso   1.00
H21    H     0.82930   0.19687   0.01855   0.00000  Uiso   1.00
H22    H     0.52326   0.43562   0.29269   0.00000  Uiso   1.00
C23    C     0.36533   0.08884   0.08338   0.00000  Uiso   1.00
O24    O     0.39139   0.12269   0.08667   0.00000  Uiso   1.00
O25    O     0.33693   0.05729   0.08023   0.00000  Uiso   1.00
O26    O     0.90980   0.53378   0.26424   0.00000  Uiso   1.00
O27    O     0.91566   0.51583   0.41509   0.00000  Uiso   1.00
C28    C     0.89857   0.50789   0.33564   0.00000  Uiso   1.00
C29    C     0.87006   0.46178   0.32107   0.00000  Uiso   1.00
C30    C     0.87150   0.41869   0.39323   0.00000  Uiso   1.00
H31    H     0.88882   0.42394   0.45966   0.00000  Uiso   1.00
C32    C     0.85104   0.36997   0.37816   0.00000  Uiso   1.00
H33    H     0.85012   0.33790   0.43310   0.00000  Uiso   1.00
C34    C     0.82969   0.36340   0.29068   0.00000  Uiso   1.00
C35    C     0.82889   0.40602   0.21837   0.00000  Uiso   1.00
H36    H     0.81375   0.39897   0.15145   0.00000  Uiso   1.00
C37    C     0.84864   0.45542   0.23342   0.00000  Uiso   1.00
H38    H     0.84896   0.48809   0.17864   0.00000  Uiso   1.00
C39    C     0.80224   0.31594   0.27668   0.00000  Uiso   1.00
O40    O     0.79493   0.28709   0.34694   0.00000  Uiso   1.00
O41    O     0.78409   0.30931   0.19684   0.00000  Uiso   1.00
Sc42   Sc    0.06345   0.44229   0.20362   0.00000  Uiso   1.00
Sc43   Sc    0.06219   0.43982   0.45699   0.00000  Uiso   1.00
Sc44   Sc    0.05863   0.94564   0.45465   0.00000  Uiso   1.00
Sc45   Sc    0.06362   0.93583   0.20729   0.00000  Uiso   1.00
O46    O     0.21440   0.35036   0.49305   0.00000  Uiso   1.00
O47    O    -0.02195   0.08710   0.02023   0.00000  Uiso   1.00
O48    O     0.14772   0.79116   0.24781   0.00000  Uiso   1.00
O49    O     0.21219   0.36072   0.14986   0.00000  Uiso   1.00
O50    O    -0.00092   0.07349   0.17087   0.00000  Uiso   1.00
O51    O     0.14533   0.79811   0.40166   0.00000  Uiso   1.00
C52    C     0.24902   0.34601   0.06901   0.00000  Uiso   1.00
C53    C     0.00270   0.09730   0.09450   0.00000  Uiso   1.00
C54    C     0.14746   0.76512   0.32511   0.00000  Uiso   1.00
C55    C     0.32898   0.33678   0.05943   0.00000  Uiso   1.00
C56    C     0.03633   0.13906   0.08878   0.00000  Uiso   1.00
C57    C     0.14327   0.69731   0.32706   0.00000  Uiso   1.00
C58    C     0.36119   0.34294   0.13895   0.00000  Uiso   1.00
C59    C     0.06532   0.15133   0.16661   0.00000  Uiso   1.00
C60    C     0.13627   0.67218   0.41116   0.00000  Uiso   1.00
H61    H     0.33312   0.34678   0.20496   0.00000  Uiso   1.00
H62    H     0.06552   0.12732   0.23046   0.00000  Uiso   1.00
H63    H     0.14394   0.69418   0.47323   0.00000  Uiso   1.00
C64    C     0.42675   0.34583   0.13164   0.00000  Uiso   1.00
C65    C     0.08967   0.19722   0.16118   0.00000  Uiso   1.00
C66    C     0.11507   0.62351   0.41433   0.00000  Uiso   1.00
H67    H     0.45138   0.35162   0.19184   0.00000  Uiso   1.00
H68    H     0.10784   0.21086   0.22113   0.00000  Uiso   1.00
H69    H     0.10744   0.60571   0.47864   0.00000  Uiso   1.00
C70    C     0.46058   0.34270   0.04489   0.00000  Uiso   1.00
C71    C     0.08603   0.23052   0.07782   0.00000  Uiso   1.00
C72    C     0.09849   0.60136   0.33351   0.00000  Uiso   1.00
C73    C     0.43101   0.33340  -0.03469   0.00000  Uiso   1.00
C74    C     0.06401   0.21190  -0.00117   0.00000  Uiso   1.00
C75    C     0.11205   0.62041   0.24866   0.00000  Uiso   1.00
H76    H     0.45888   0.32973  -0.10072   0.00000  Uiso   1.00
H77    H     0.06420   0.23542  -0.06513   0.00000  Uiso   1.00
H78    H     0.10200   0.60024   0.18692   0.00000  Uiso   1.00
C79    C     0.36522   0.33060  -0.02761   0.00000  Uiso   1.00
C80    C     0.03871   0.16698   0.00427   0.00000  Uiso   1.00
C81    C     0.13499   0.66761   0.24540   0.00000  Uiso   1.00
H82    H     0.34006   0.32547  -0.08769   0.00000  Uiso   1.00
H83    H     0.01897   0.15455  -0.05521   0.00000  Uiso   1.00
H84    H     0.14324   0.68482   0.18105   0.00000  Uiso   1.00
C85    C     0.52733   0.34980   0.03799   0.00000  Uiso   1.00
C86    C     0.09558   0.29388   0.07433   0.00000  Uiso   1.00
C87    C     0.06310   0.56078   0.33769   0.00000  Uiso   1.00
O88    O     0.54965   0.36123   0.11212   0.00000  Uiso   1.00
O89    O     0.10279   0.31979   0.14983   0.00000  Uiso   1.00
O90    O     0.05486   0.54014   0.41445   0.00000  Uiso   1.00
O91    O     0.55910   0.34387  -0.04204   0.00000  Uiso   1.00
O92    O     0.09156   0.32321   0.49839   0.00000  Uiso   1.00
O93    O     0.04151   0.54933   0.26310   0.00000  Uiso   1.00
O94    O     0.12291   0.36639   0.32410   0.00000  Uiso   1.00
O95    O    -0.00479   0.51536   0.08626   0.00000  Uiso   1.00
O96    O     0.13706   0.87762   0.07400   0.00000  Uiso   1.00
O97    O    -0.01715   1.00695   0.33583   0.00000  Uiso   1.00
H98    H     0.15662   0.29889   0.31847   0.00000  Uiso   1.00
H99    H    -0.07088   0.59120   0.09053   0.00000  Uiso   1.00
H100   H     0.21193   0.83140   0.06915   0.00000  Uiso   1.00
H101   H    -0.09493   1.07136   0.34113   0.00000  Uiso   1.00
C102   C     0.36756   0.16589   0.34191   0.00000  Uiso   1.00
C103   C     0.32922   0.62691   0.07577   0.00000  Uiso   1.00
O104   O     0.32783   0.14602   0.35267   0.00000  Uiso   1.00
O105   O     0.35305   0.66179   0.09176   0.00000  Uiso   1.00
O106   O     0.40880   0.18391   0.33044   0.00000  Uiso   1.00
O107   O     0.30653   0.59115   0.05912   0.00000  Uiso   1.00
Sc108  Sc    0.67129   0.82132   0.15559   0.00000  Uiso   1.00
Sc109  Sc    0.66978   0.83009   0.40304   0.00000  Uiso   1.00
O110   O     0.52173   0.90619   0.21459   0.00000  Uiso   1.00
O111   O     0.81643   0.75251   0.44618   0.00000  Uiso   1.00
O112   O     0.57982   0.47220  -0.03461   0.00000  Uiso   1.00
O113   O     0.51858   0.91676   0.36829   0.00000  Uiso   1.00
O114   O     0.82249   0.73242   0.09190   0.00000  Uiso   1.00
O115   O     0.58708   0.47347   0.11826   0.00000  Uiso   1.00
C116   C     0.48846   0.91415   0.29490   0.00000  Uiso   1.00
C117   C     0.83250   0.75884   0.02000   0.00000  Uiso   1.00
C118   C     0.58238   0.50250   0.04088   0.00000  Uiso   1.00
C119   C     0.41313   0.91732   0.30235   0.00000  Uiso   1.00
C120   C     0.86541   0.80116   0.03344   0.00000  Uiso   1.00
C121   C     0.58565   0.57082   0.03728   0.00000  Uiso   1.00
C122   C     0.37380   0.92635   0.38890   0.00000  Uiso   1.00
C123   C     0.89200   0.80274   0.12008   0.00000  Uiso   1.00
C124   C     0.60278   0.59420   0.11673   0.00000  Uiso   1.00
H125   H     0.39544   0.93523   0.44944   0.00000  Uiso   1.00
H126   H     0.89315   0.76849   0.17417   0.00000  Uiso   1.00
H127   H     0.60258   0.57111   0.18099   0.00000  Uiso   1.00
C128   C     0.30822   0.92341   0.39530   0.00000  Uiso   1.00
C129   C     0.91404   0.85004   0.13549   0.00000  Uiso   1.00
C130   C     0.62370   0.64302   0.11100   0.00000  Uiso   1.00
H131   H     0.27720   0.93044   0.46110   0.00000  Uiso   1.00
H132   H     0.93235   0.85391   0.20194   0.00000  Uiso   1.00
H133   H     0.63988   0.65893   0.17084   0.00000  Uiso   1.00
C134   C     0.28216   0.91054   0.31528   0.00000  Uiso   1.00
C135   C     0.91071   0.89524   0.06431   0.00000  Uiso   1.00
C136   C     0.62658   0.66994   0.02579   0.00000  Uiso   1.00
C137   C     0.32097   0.90209   0.22883   0.00000  Uiso   1.00
C138   C     0.88574   0.89213  -0.02260   0.00000  Uiso   1.00
C139   C     0.60211   0.65307  -0.05232   0.00000  Uiso   1.00
H140   H     0.29999   0.89237   0.16823   0.00000  Uiso   1.00
H141   H     0.88520   0.92571  -0.07693   0.00000  Uiso   1.00
H142   H     0.60260   0.67591  -0.11674   0.00000  Uiso   1.00
C143   C     0.38617   0.90550   0.22227   0.00000  Uiso   1.00
C144   C     0.86277   0.84564  -0.03798   0.00000  Uiso   1.00
C145   C     0.58258   0.60295  -0.04674   0.00000  Uiso   1.00
H146   H     0.41720   0.89848   0.15657   0.00000  Uiso   1.00
H147   H     0.84207   0.84376  -0.10383   0.00000  Uiso   1.00
H148   H     0.56854   0.58528  -0.10694   0.00000  Uiso   1.00
C149   C     0.21263   0.90669   0.32216   0.00000  Uiso   1.00
C150   C     0.93750   0.94327   0.07899   0.00000  Uiso   1.00
C151   C     0.65863   0.71351   0.01891   0.00000  Uiso   1.00
O152   O     0.17825   0.91568   0.40224   0.00000  Uiso   1.00
O153   O     0.95619   0.94975   0.15859   0.00000  Uiso   1.00
O154   O     0.68467   0.72196   0.09205   0.00000  Uiso   1.00
O155   O     0.19022   0.89535   0.24816   0.00000  Uiso   1.00
O156   O     0.94265   0.97374   0.00869   0.00000  Uiso   1.00
O157   O     0.67809   0.72834   0.44374   0.00000  Uiso   1.00
O158   O     0.73904   0.75060   0.27439   0.00000  Uiso   1.00
O159   O     0.60612   0.90404   0.03779   0.00000  Uiso   1.00
H160   H     0.80532   0.67470   0.27021   0.00000  Uiso   1.00
H161   H     0.57590   0.96966   0.04783   0.00000  Uiso   1.00
C162   C     0.41114   0.63469   0.29441   0.00000  Uiso   1.00
O163   O     0.38144   0.60429   0.29736   0.00000  Uiso   1.00
O164   O     0.43949   0.66621   0.29181   0.00000  Uiso   1.00
Sc165  Sc    0.67187   0.32419   0.90681   0.00000  Uiso   1.00
Sc166  Sc    0.66686   0.33663   0.65338   0.00000  Uiso   1.00
O167   O     0.73423   0.19654   0.68645   0.00000  Uiso   1.00
O168   O     0.75710   0.18200   0.83660   0.00000  Uiso   1.00
C169   C     0.73165   0.17200   0.76292   0.00000  Uiso   1.00
C170   C     0.69713   0.13085   0.76977   0.00000  Uiso   1.00
C171   C     0.68927   0.10815   0.85519   0.00000  Uiso   1.00
H172   H     0.70517   0.12428   0.91513   0.00000  Uiso   1.00
C173   C     0.66264   0.06437   0.86129   0.00000  Uiso   1.00
H174   H     0.65738   0.04581   0.92633   0.00000  Uiso   1.00
C175   C     0.64584   0.04057   0.78196   0.00000  Uiso   1.00
C176   C     0.64764   0.06899   0.69746   0.00000  Uiso   1.00
H177   H     0.63346   0.05163   0.63698   0.00000  Uiso   1.00
C178   C     0.67211   0.11469   0.69150   0.00000  Uiso   1.00
H179   H     0.67547   0.13518   0.62679   0.00000  Uiso   1.00
C180   C     0.63512  -0.02210   0.78581   0.00000  Uiso   1.00
O181   O     0.63352  -0.04694   0.86328   0.00000  Uiso   1.00
O182   O     0.63220  -0.05098   0.70941   0.00000  Uiso   1.00
O183   O     0.74948   0.26117   0.52578   0.00000  Uiso   1.00
O184   O     0.59331   0.39206   0.78701   0.00000  Uiso   1.00
H185   H     0.82690   0.19559   0.52198   0.00000  Uiso   1.00
H186   H     0.52114   0.43106   0.79044   0.00000  Uiso   1.00
C187   C     0.36107   0.09306   0.57225   0.00000  Uiso   1.00
O188   O     0.38960   0.12462   0.57495   0.00000  Uiso   1.00
O189   O     0.33055   0.06363   0.56961   0.00000  Uiso   1.00
O190   O     0.90583   0.54250   0.76887   0.00000  Uiso   1.00
O191   O     0.91381   0.52194   0.91946   0.00000  Uiso   1.00
C192   C     0.89259   0.51844   0.84047   0.00000  Uiso   1.00
C193   C     0.85727   0.47877   0.82626   0.00000  Uiso   1.00
C194   C     0.85861   0.43566   0.89827   0.00000  Uiso   1.00
H195   H     0.87835   0.43867   0.96422   0.00000  Uiso   1.00
C196   C     0.83617   0.38876   0.88345   0.00000  Uiso   1.00
H197   H     0.83598   0.35602   0.93819   0.00000  Uiso   1.00
C198   C     0.81344   0.38350   0.79624   0.00000  Uiso   1.00
C199   C     0.81085   0.42785   0.72444   0.00000  Uiso   1.00
H200   H     0.79390   0.42241   0.65789   0.00000  Uiso   1.00
C201   C     0.83201   0.47610   0.73920   0.00000  Uiso   1.00
H202   H     0.83162   0.50952   0.68473   0.00000  Uiso   1.00
C203   C     0.78885   0.33342   0.78199   0.00000  Uiso   1.00
O204   O     0.78305   0.30340   0.85228   0.00000  Uiso   1.00
O205   O     0.77286   0.32446   0.70196   0.00000  Uiso   1.00
Sc206  Sc    0.05903   0.44865   0.70441   0.00000  Uiso   1.00
Sc207  Sc    0.06566   0.43763   0.95785   0.00000  Uiso   1.00
Sc208  Sc    0.05932   0.94543   0.95416   0.00000  Uiso   1.00
Sc209  Sc    0.05968   0.94076   0.70790   0.00000  Uiso   1.00
O210   O     0.21742   0.34334   0.99682   0.00000  Uiso   1.00
O211   O    -0.02303   0.08834   0.51959   0.00000  Uiso   1.00
O212   O     0.13760   0.79848   0.74599   0.00000  Uiso   1.00
O213   O     0.20740   0.36582   0.64669   0.00000  Uiso   1.00
O214   O    -0.00670   0.07901   0.67098   0.00000  Uiso   1.00
O215   O     0.14960   0.79784   0.89778   0.00000  Uiso   1.00
C216   C     0.24184   0.35649   0.56663   0.00000  Uiso   1.00
C217   C    -0.00128   0.10123   0.59431   0.00000  Uiso   1.00
C218   C     0.14437   0.76876   0.82349   0.00000  Uiso   1.00
C219   C     0.31491   0.35631   0.55939   0.00000  Uiso   1.00
C220   C     0.03192   0.14330   0.58899   0.00000  Uiso   1.00
C221   C     0.14018   0.70133   0.82780   0.00000  Uiso   1.00
C222   C     0.33981   0.37055   0.63952   0.00000  Uiso   1.00
C223   C     0.04582   0.16860   0.66962   0.00000  Uiso   1.00
C224   C     0.13979   0.67185   0.91204   0.00000  Uiso   1.00
H225   H     0.30861   0.37764   0.70522   0.00000  Uiso   1.00
H226   H     0.03553   0.15356   0.73443   0.00000  Uiso   1.00
H227   H     0.15168   0.69108   0.97281   0.00000  Uiso   1.00
C228   C     0.40328   0.37607   0.63321   0.00000  Uiso   1.00
C229   C     0.06848   0.21594   0.66535   0.00000  Uiso   1.00
C230   C     0.11940   0.62239   0.91687   0.00000  Uiso   1.00
H231   H     0.42247   0.38770   0.69395   0.00000  Uiso   1.00
H232   H     0.07457   0.24005   0.72697   0.00000  Uiso   1.00
H233   H     0.11606   0.60160   0.98134   0.00000  Uiso   1.00
C234   C     0.44398   0.36587   0.54684   0.00000  Uiso   1.00
C235   C     0.07927   0.23681   0.58029   0.00000  Uiso   1.00
C236   C     0.09794   0.60360   0.83775   0.00000  Uiso   1.00
C237   C     0.41931   0.35135   0.46680   0.00000  Uiso   1.00
C238   C     0.07274   0.20483   0.49925   0.00000  Uiso   1.00
C239   C     0.10433   0.62779   0.75263   0.00000  Uiso   1.00
H240   H     0.45113   0.34337   0.40103   0.00000  Uiso   1.00
H241   H     0.08433   0.21857   0.43433   0.00000  Uiso   1.00
H242   H     0.09044   0.61022   0.69212   0.00000  Uiso   1.00
C243   C     0.35426   0.34757   0.47306   0.00000  Uiso   1.00
C244   C     0.04820   0.15913   0.50348   0.00000  Uiso   1.00
C245   C     0.12562   0.67620   0.74766   0.00000  Uiso   1.00
H246   H     0.33352   0.33784   0.41236   0.00000  Uiso   1.00
H247   H     0.04004   0.13660   0.44220   0.00000  Uiso   1.00
H248   H     0.12803   0.69770   0.68345   0.00000  Uiso   1.00
C249   C     0.51543   0.36775   0.53909   0.00000  Uiso   1.00
C250   C     0.08971   0.29949   0.57653   0.00000  Uiso   1.00
C251   C     0.06558   0.56053   0.84269   0.00000  Uiso   1.00
O252   O     0.53731   0.38068   0.61259   0.00000  Uiso   1.00
O253   O     0.09282   0.32891   0.65226   0.00000  Uiso   1.00
O254   O     0.06089   0.53711   0.91938   0.00000  Uiso   1.00
O255   O     0.55287   0.35415   0.45873   0.00000  Uiso   1.00
O256   O     0.09190   0.32240   0.99720   0.00000  Uiso   1.00
O257   O     0.04333   0.54971   0.76821   0.00000  Uiso   1.00
O258   O     0.12017   0.36927   0.82342   0.00000  Uiso   1.00
O259   O    -0.00865   0.51923   0.58574   0.00000  Uiso   1.00
O260   O     0.13479   0.87981   0.57488   0.00000  Uiso   1.00
O261   O    -0.01822   1.01163   0.83683   0.00000  Uiso   1.00
H262   H     0.14950   0.30403   0.81472   0.00000  Uiso   1.00
H263   H    -0.07552   0.59499   0.59026   0.00000  Uiso   1.00
H264   H     0.21035   0.83125   0.56915   0.00000  Uiso   1.00
H265   H    -0.09626   1.07444   0.84133   0.00000  Uiso   1.00
C266   C     0.36112   0.17222   0.79442   0.00000  Uiso   1.00
C267   C     0.31739   0.63276   0.56984   0.00000  Uiso   1.00
O268   O     0.32724   0.14621   0.78608   0.00000  Uiso   1.00
O269   O     0.35238   0.65742   0.55890   0.00000  Uiso   1.00
O270   O     0.39649   0.19656   0.80237   0.00000  Uiso   1.00
O271   O     0.28378   0.60682   0.58013   0.00000  Uiso   1.00
Sc272  Sc    0.66683   0.82889   0.65699   0.00000  Uiso   1.00
Sc273  Sc    0.65950   0.83711   0.90343   0.00000  Uiso   1.00
O274   O     0.51634   0.91161   0.70849   0.00000  Uiso   1.00
O275   O     0.81036   0.75483   0.94179   0.00000  Uiso   1.00
O276   O     0.59217   0.46749   0.45867   0.00000  Uiso   1.00
O277   O     0.50983   0.92918   0.86177   0.00000  Uiso   1.00
O278   O     0.82113   0.73562   0.59708   0.00000  Uiso   1.00
O279   O     0.58465   0.47983   0.61287   0.00000  Uiso   1.00
C280   C     0.48191   0.92219   0.78904   0.00000  Uiso   1.00
C281   C     0.83356   0.76051   0.52562   0.00000  Uiso   1.00
C282   C     0.58585   0.50422   0.53479   0.00000  Uiso   1.00
C283   C     0.40870   0.92297   0.79822   0.00000  Uiso   1.00
C284   C     0.86363   0.80529   0.53981   0.00000  Uiso   1.00
C285   C     0.58728   0.57397   0.53181   0.00000  Uiso   1.00
C286   C     0.37319   0.92873   0.88545   0.00000  Uiso   1.00
C287   C     0.88440   0.81260   0.62745   0.00000  Uiso   1.00
C288   C     0.59172   0.60721   0.61343   0.00000  Uiso   1.00
H289   H     0.39629   0.93666   0.94540   0.00000  Uiso   1.00
H290   H     0.88267   0.78131   0.68270   0.00000  Uiso   1.00
H291   H     0.58116   0.59222   0.67803   0.00000  Uiso   1.00
C292   C     0.30942   0.92357   0.89321   0.00000  Uiso   1.00
C293   C     0.90481   0.86143   0.64216   0.00000  Uiso   1.00
C294   C     0.61460   0.65439   0.60971   0.00000  Uiso   1.00
H295   H     0.28116   0.92810   0.95951   0.00000  Uiso   1.00
H296   H     0.91899   0.86941   0.70920   0.00000  Uiso   1.00
H297   H     0.62190   0.67715   0.67150   0.00000  Uiso   1.00
C298   C     0.28136   0.91198   0.81397   0.00000  Uiso   1.00
C299   C     0.90544   0.90267   0.56945   0.00000  Uiso   1.00
C300   C     0.63202   0.66976   0.52452   0.00000  Uiso   1.00
C301   C     0.31679   0.90649   0.72687   0.00000  Uiso   1.00
C302   C     0.88541   0.89466   0.48181   0.00000  Uiso   1.00
C303   C     0.61855   0.64460   0.44351   0.00000  Uiso   1.00
H304   H     0.29440   0.89769   0.66687   0.00000  Uiso   1.00
H305   H     0.88770   0.92535   0.42639   0.00000  Uiso   1.00
H306   H     0.62899   0.65978   0.37891   0.00000  Uiso   1.00
C307   C     0.38022   0.91196   0.71895   0.00000  Uiso   1.00
C308   C     0.86414   0.84658   0.46714   0.00000  Uiso   1.00
C309   C     0.59717   0.59605   0.44707   0.00000  Uiso   1.00
H310   H     0.40864   0.90728   0.65277   0.00000  Uiso   1.00
H311   H     0.84777   0.84048   0.40051   0.00000  Uiso   1.00
H312   H     0.59222   0.57138   0.38513   0.00000  Uiso   1.00
C313   C     0.21233   0.90743   0.82203   0.00000  Uiso   1.00
C314   C     0.93157   0.95141   0.58359   0.00000  Uiso   1.00
C315   C     0.66747   0.71014   0.52092   0.00000  Uiso   1.00
O316   O     0.17916   0.91562   0.90235   0.00000  Uiso   1.00
O317   O     0.94670   0.96087   0.66390   0.00000  Uiso   1.00
O318   O     0.68630   0.72375   0.59647   0.00000  Uiso   1.00
O319   O     0.18893   0.89654   0.74839   0.00000  Uiso   1.00
O320   O     0.93942   0.97939   0.51308   0.00000  Uiso   1.00
O321   O     0.65938   0.73951   0.94211   0.00000  Uiso   1.00
O322   O     0.73165   0.75777   0.77544   0.00000  Uiso   1.00
O323   O     0.60956   0.90445   0.53619   0.00000  Uiso   1.00
H324   H     0.79945   0.68222   0.77116   0.00000  Uiso   1.00
H325   H     0.57232   0.97353   0.54337   0.00000  Uiso   1.00
C326   C     0.40280   0.63471   0.78328   0.00000  Uiso   1.00
O327   O     0.37322   0.60446   0.77492   0.00000  Uiso   1.00
O328   O     0.43103   0.66614   0.79169   0.00000  Uiso   1.00
#===END of data_int(2.2)_AIMD

data_int(3.3)_AIMD
_symmetry_space_group_name_H-M    'P1'
_symmetry_Int_Tables_number       1
loop_
_symmetry_equiv_pos_as_xyz
  x,y,z
_cell_length_a                    20.8862
_cell_length_b                    20.8458
_cell_length_c                    14.9011
_cell_angle_alpha                 85.1565
_cell_angle_beta                  83.5822
_cell_angle_gamma                 38.3064
loop_
_atom_site_label
_atom_site_type_symbol
_atom_site_fract_x
_atom_site_fract_y
_atom_site_fract_z
_atom_site_U_iso_or_equiv
_atom_site_adp_type
_atom_site_occupancy
Sc1    Sc    0.68454   0.30842   0.41230   0.00000  Uiso   1.00
Sc2    Sc    0.66767   0.33186   0.15933   0.00000  Uiso   1.00
O3     O     0.74669   0.18806   0.21292   0.00000  Uiso   1.00
O4     O     0.73439   0.17975   0.36554   0.00000  Uiso   1.00
C5     C     0.72348   0.16991   0.28597   0.00000  Uiso   1.00
C6     C     0.68109   0.13668   0.27906   0.00000  Uiso   1.00
C7     C     0.64721   0.12456   0.35880   0.00000  Uiso   1.00
H8     H     0.64742   0.14464   0.42380   0.00000  Uiso   1.00
C9     C     0.61805   0.08303   0.35378   0.00000  Uiso   1.00
H10    H     0.59435   0.07106   0.41469   0.00000  Uiso   1.00
C11    C     0.62451   0.05113   0.26896   0.00000  Uiso   1.00
C12    C     0.64881   0.07224   0.18868   0.00000  Uiso   1.00
H13    H     0.65098   0.04982   0.12382   0.00000  Uiso   1.00
C14    C     0.67580   0.11604   0.19365   0.00000  Uiso   1.00
H15    H     0.69684   0.13073   0.13272   0.00000  Uiso   1.00
C16    C     0.61832  -0.01605   0.26674   0.00000  Uiso   1.00
O17    O     0.59682  -0.03275   0.34277   0.00000  Uiso   1.00
O18    O     0.63983  -0.05816   0.19169   0.00000  Uiso   1.00
O19    O     0.74913   0.25284   0.03582   0.00000  Uiso   1.00
O20    O     0.59724   0.38853   0.29299   0.00000  Uiso   1.00
H21    H     0.81350   0.17723   0.04012   0.00000  Uiso   1.00
H22    H     0.52984   0.41980   0.30520   0.00000  Uiso   1.00
C23    C     0.35029   0.03119   0.06478   0.00000  Uiso   1.00
O24    O     0.37018   0.06926   0.07918   0.00000  Uiso   1.00
O25    O     0.32938  -0.00612   0.05221   0.00000  Uiso   1.00
O26    O     0.91229   0.52788   0.28534   0.00000  Uiso   1.00
O27    O     0.93569   0.47430   0.43105   0.00000  Uiso   1.00
C28    C     0.90857   0.48603   0.35207   0.00000  Uiso   1.00
C29    C     0.87621   0.44516   0.33247   0.00000  Uiso   1.00
C30    C     0.87928   0.39094   0.40019   0.00000  Uiso   1.00
H31    H     0.89762   0.38656   0.46770   0.00000  Uiso   1.00
C32    C     0.85721   0.34526   0.38039   0.00000  Uiso   1.00
H33    H     0.85858   0.30387   0.43180   0.00000  Uiso   1.00
C34    C     0.83090   0.35453   0.29239   0.00000  Uiso   1.00
C35    C     0.82657   0.40985   0.22484   0.00000  Uiso   1.00
H36    H     0.80752   0.41477   0.15753   0.00000  Uiso   1.00
C37    C     0.84876   0.45544   0.24451   0.00000  Uiso   1.00
H38    H     0.84659   0.49757   0.19336   0.00000  Uiso   1.00
C39    C     0.80257   0.30998   0.27231   0.00000  Uiso   1.00
O40    O     0.80976   0.25797   0.33585   0.00000  Uiso   1.00
O41    O     0.76806   0.32855   0.19569   0.00000  Uiso   1.00
Sc42   Sc    0.05089   0.45324   0.20842   0.00000  Uiso   1.00
Sc43   Sc    0.05616   0.44564   0.46158   0.00000  Uiso   1.00
Sc44   Sc    0.05309   0.95450   0.45864   0.00000  Uiso   1.00
Sc45   Sc    0.05484   0.94480   0.21119   0.00000  Uiso   1.00
O46    O     0.18038   0.41254   0.48509   0.00000  Uiso   1.00
O47    O    -0.00195   0.08717  -0.00019   0.00000  Uiso   1.00
O48    O     0.13332   0.80694   0.27974   0.00000  Uiso   1.00
O49    O     0.18893   0.38426   0.14149   0.00000  Uiso   1.00
O50    O    -0.02173   0.08571   0.15296   0.00000  Uiso   1.00
O51    O     0.09653   0.82285   0.43139   0.00000  Uiso   1.00
C52    C     0.22162   0.38627   0.06390   0.00000  Uiso   1.00
C53    C     0.00299   0.10236   0.07969   0.00000  Uiso   1.00
C54    C     0.11266   0.78719   0.35397   0.00000  Uiso   1.00
C55    C     0.29703   0.38216   0.06216   0.00000  Uiso   1.00
C56    C     0.03994   0.14062   0.08799   0.00000  Uiso   1.00
C57    C     0.10295   0.72355   0.34794   0.00000  Uiso   1.00
C58    C     0.31965   0.38886   0.14454   0.00000  Uiso   1.00
C59    C     0.04959   0.15508   0.17458   0.00000  Uiso   1.00
C60    C     0.07727   0.70222   0.42686   0.00000  Uiso   1.00
H61    H     0.28179   0.39735   0.20772   0.00000  Uiso   1.00
H62    H     0.03355   0.13435   0.23425   0.00000  Uiso   1.00
H63    H     0.07185   0.72625   0.49231   0.00000  Uiso   1.00
C64    C     0.39036   0.38466   0.14419   0.00000  Uiso   1.00
C65    C     0.07567   0.19920   0.18226   0.00000  Uiso   1.00
C66    C     0.05474   0.65486   0.41956   0.00000  Uiso   1.00
H67    H     0.40846   0.38993   0.20682   0.00000  Uiso   1.00
H68    H     0.07837   0.21557   0.24831   0.00000  Uiso   1.00
H69    H     0.03384   0.63882   0.47915   0.00000  Uiso   1.00
C70    C     0.43846   0.37425   0.06089   0.00000  Uiso   1.00
C71    C     0.09320   0.22806   0.10314   0.00000  Uiso   1.00
C72    C     0.05538   0.63061   0.33313   0.00000  Uiso   1.00
C73    C     0.41530   0.36806  -0.02191   0.00000  Uiso   1.00
C74    C     0.09031   0.20711   0.01659   0.00000  Uiso   1.00
C75    C     0.08833   0.64494   0.25463   0.00000  Uiso   1.00
H76    H     0.45290   0.36021  -0.08503   0.00000  Uiso   1.00
H77    H     0.10493   0.22894  -0.04308   0.00000  Uiso   1.00
H78    H     0.09153   0.62282   0.18902   0.00000  Uiso   1.00
C79    C     0.34463   0.37233  -0.02119   0.00000  Uiso   1.00
C80    C     0.06445   0.16286   0.00901   0.00000  Uiso   1.00
C81    C     0.11208   0.69129   0.26204   0.00000  Uiso   1.00
H82    H     0.32545   0.36832  -0.08385   0.00000  Uiso   1.00
H83    H     0.06009   0.14788  -0.05684   0.00000  Uiso   1.00
H84    H     0.13315   0.70697   0.20209   0.00000  Uiso   1.00
C85    C     0.51435   0.36961   0.05942   0.00000  Uiso   1.00
C86    C     0.10607   0.28896   0.10900   0.00000  Uiso   1.00
C87    C     0.01921   0.59165   0.32513   0.00000  Uiso   1.00
O88    O     0.54475   0.36191   0.13500   0.00000  Uiso   1.00
O89    O     0.08965   0.32479   0.18647   0.00000  Uiso   1.00
O90    O    -0.00854   0.57770   0.39785   0.00000  Uiso   1.00
O91    O     0.54541   0.37334  -0.01865   0.00000  Uiso   1.00
O92    O     0.13366   0.30579   0.52482   0.00000  Uiso   1.00
O93    O     0.01682   0.57359   0.24569   0.00000  Uiso   1.00
O94    O     0.12445   0.37399   0.33147   0.00000  Uiso   1.00
O95    O    -0.01663   0.51826   0.08517   0.00000  Uiso   1.00
O96    O     0.13002   0.88080   0.08065   0.00000  Uiso   1.00
O97    O    -0.02009   1.02243   0.33636   0.00000  Uiso   1.00
H98    H     0.16947   0.30095   0.32887   0.00000  Uiso   1.00
H99    H    -0.07836   0.59476   0.08136   0.00000  Uiso   1.00
H100   H     0.20251   0.83808   0.07504   0.00000  Uiso   1.00
H101   H    -0.08188   1.09853   0.33209   0.00000  Uiso   1.00
C102   C     0.35706   0.20961   0.28324   0.00000  Uiso   1.00
C103   C     0.34924   0.60642   0.21955   0.00000  Uiso   1.00
O104   O     0.34882   0.17001   0.24238   0.00000  Uiso   1.00
O105   O     0.34889   0.65718   0.17606   0.00000  Uiso   1.00
O106   O     0.36702   0.24778   0.32377   0.00000  Uiso   1.00
O107   O     0.35149   0.55440   0.26339   0.00000  Uiso   1.00
Sc108  Sc    0.68448   0.80967   0.16457   0.00000  Uiso   1.00
Sc109  Sc    0.66244   0.83592   0.41159   0.00000  Uiso   1.00
O110   O     0.54493   0.87831   0.22542   0.00000  Uiso   1.00
O111   O     0.78105   0.80885   0.44655   0.00000  Uiso   1.00
O112   O     0.61726   0.45696  -0.06248   0.00000  Uiso   1.00
O113   O     0.53117   0.88300   0.37951   0.00000  Uiso   1.00
O114   O     0.82050   0.73961   0.08759   0.00000  Uiso   1.00
O115   O     0.58653   0.46938   0.09022   0.00000  Uiso   1.00
C116   C     0.50633   0.88434   0.30323   0.00000  Uiso   1.00
C117   C     0.82504   0.78061   0.02025   0.00000  Uiso   1.00
C118   C     0.60220   0.49252   0.01461   0.00000  Uiso   1.00
C119   C     0.42836   0.89170   0.30384   0.00000  Uiso   1.00
C120   C     0.85693   0.82206   0.03878   0.00000  Uiso   1.00
C121   C     0.61052   0.55772   0.01939   0.00000  Uiso   1.00
C122   C     0.36524   0.92208   0.38331   0.00000  Uiso   1.00
C123   C     0.87768   0.81819   0.12782   0.00000  Uiso   1.00
C124   C     0.60705   0.58468   0.10575   0.00000  Uiso   1.00
H125   H     0.37333   0.93953   0.44448   0.00000  Uiso   1.00
H126   H     0.87523   0.78049   0.18050   0.00000  Uiso   1.00
H127   H     0.58584   0.56907   0.16546   0.00000  Uiso   1.00
C128   C     0.29455   0.92634   0.38332   0.00000  Uiso   1.00
C129   C     0.89871   0.86496   0.14681   0.00000  Uiso   1.00
C130   C     0.63718   0.62487   0.11425   0.00000  Uiso   1.00
H131   H     0.24624   0.94894   0.44424   0.00000  Uiso   1.00
H132   H     0.91208   0.86565   0.21498   0.00000  Uiso   1.00
H133   H     0.63835   0.64209   0.18056   0.00000  Uiso   1.00
C134   C     0.28658   0.89963   0.30456   0.00000  Uiso   1.00
C135   C     0.90031   0.91439   0.07705   0.00000  Uiso   1.00
C136   C     0.67156   0.63833   0.03639   0.00000  Uiso   1.00
C137   C     0.34904   0.87017   0.22472   0.00000  Uiso   1.00
C138   C     0.88109   0.91685  -0.01231   0.00000  Uiso   1.00
C139   C     0.66543   0.62067  -0.05050   0.00000  Uiso   1.00
H140   H     0.34269   0.84980   0.16432   0.00000  Uiso   1.00
H141   H     0.88355   0.95455  -0.06498   0.00000  Uiso   1.00
H142   H     0.68675   0.63642  -0.11001   0.00000  Uiso   1.00
C143   C     0.41995   0.86556   0.22481   0.00000  Uiso   1.00
C144   C     0.85963   0.87049  -0.03125   0.00000  Uiso   1.00
C145   C     0.63506   0.58064  -0.05915   0.00000  Uiso   1.00
H146   H     0.46978   0.84101   0.16458   0.00000  Uiso   1.00
H147   H     0.84550   0.87045  -0.09933   0.00000  Uiso   1.00
H148   H     0.63436   0.56287  -0.12539   0.00000  Uiso   1.00
C149   C     0.21285   0.90133   0.30821   0.00000  Uiso   1.00
C150   C     0.92645   0.96100   0.09677   0.00000  Uiso   1.00
C151   C     0.71469   0.67044   0.04619   0.00000  Uiso   1.00
O152   O     0.18487   0.89577   0.38747   0.00000  Uiso   1.00
O153   O     0.95302   0.95010   0.17579   0.00000  Uiso   1.00
O154   O     0.71776   0.68772   0.12571   0.00000  Uiso   1.00
O155   O     0.18157   0.90812   0.23416   0.00000  Uiso   1.00
O156   O     0.92409   1.00801   0.03125   0.00000  Uiso   1.00
O157   O     0.71756   0.70578   0.47057   0.00000  Uiso   1.00
O158   O     0.74740   0.75040   0.29078   0.00000  Uiso   1.00
O159   O     0.61304   0.88431   0.04182   0.00000  Uiso   1.00
H160   H     0.81087   0.67427   0.29594   0.00000  Uiso   1.00
H161   H     0.54531   0.95798   0.04952   0.00000  Uiso   1.00
C162   C     0.43960   0.62934   0.35836   0.00000  Uiso   1.00
O163   O     0.39775   0.62101   0.40773   0.00000  Uiso   1.00
O164   O     0.47908   0.64017   0.30846   0.00000  Uiso   1.00
Sc165  Sc    0.67684   0.31554   0.91340   0.00000  Uiso   1.00
Sc166  Sc    0.67927   0.31538   0.66083   0.00000  Uiso   1.00
O167   O     0.74739   0.18019   0.72436   0.00000  Uiso   1.00
O168   O     0.72730   0.18314   0.87772   0.00000  Uiso   1.00
C169   C     0.72137   0.16674   0.79925   0.00000  Uiso   1.00
C170   C     0.68212   0.13029   0.79440   0.00000  Uiso   1.00
C171   C     0.66305   0.10396   0.87455   0.00000  Uiso   1.00
H172   H     0.67135   0.11631   0.93960   0.00000  Uiso   1.00
C173   C     0.63851   0.05808   0.86903   0.00000  Uiso   1.00
H174   H     0.62923   0.03238   0.92973   0.00000  Uiso   1.00
C175   C     0.63182   0.03916   0.78338   0.00000  Uiso   1.00
C176   C     0.64365   0.07235   0.70361   0.00000  Uiso   1.00
H177   H     0.63856   0.05738   0.63814   0.00000  Uiso   1.00
C178   C     0.66817   0.11816   0.70913   0.00000  Uiso   1.00
H179   H     0.68000   0.14174   0.64852   0.00000  Uiso   1.00
C180   C     0.61956  -0.02241   0.77762   0.00000  Uiso   1.00
O181   O     0.60314  -0.04585   0.85199   0.00000  Uiso   1.00
O182   O     0.62942  -0.05174   0.69870   0.00000  Uiso   1.00
O183   O     0.75483   0.23902   0.53544   0.00000  Uiso   1.00
O184   O     0.60212   0.38309   0.79078   0.00000  Uiso   1.00
H185   H     0.81712   0.16252   0.53773   0.00000  Uiso   1.00
H186   H     0.52691   0.43599   0.79490   0.00000  Uiso   1.00
C187   C     0.35705   0.08049   0.49456   0.00000  Uiso   1.00
O188   O     0.37320   0.11599   0.44738   0.00000  Uiso   1.00
O189   O     0.33990   0.04593   0.54220   0.00000  Uiso   1.00
O190   O     0.92580   0.51364   0.78120   0.00000  Uiso   1.00
O191   O     0.95132   0.45590   0.92540   0.00000  Uiso   1.00
C192   C     0.92328   0.46967   0.84645   0.00000  Uiso   1.00
C193   C     0.89064   0.42925   0.82652   0.00000  Uiso   1.00
C194   C     0.88527   0.38282   0.89650   0.00000  Uiso   1.00
H195   H     0.89870   0.38315   0.96476   0.00000  Uiso   1.00
C196   C     0.86090   0.33909   0.87785   0.00000  Uiso   1.00
H197   H     0.85593   0.30362   0.93099   0.00000  Uiso   1.00
C198   C     0.84043   0.34270   0.78877   0.00000  Uiso   1.00
C199   C     0.84649   0.38846   0.71860   0.00000  Uiso   1.00
H200   H     0.83383   0.38738   0.65021   0.00000  Uiso   1.00
C201   C     0.87079   0.43233   0.73725   0.00000  Uiso   1.00
H202   H     0.87606   0.46751   0.68406   0.00000  Uiso   1.00
C203   C     0.80891   0.30065   0.77017   0.00000  Uiso   1.00
O204   O     0.80594   0.25827   0.83687   0.00000  Uiso   1.00
O205   O     0.78293   0.31060   0.69123   0.00000  Uiso   1.00
Sc206  Sc    0.06029   0.44805   0.70827   0.00000  Uiso   1.00
Sc207  Sc    0.06315   0.43635   0.96226   0.00000  Uiso   1.00
Sc208  Sc    0.05219   0.95373   0.95875   0.00000  Uiso   1.00
Sc209  Sc    0.06239   0.94089   0.71249   0.00000  Uiso   1.00
O210   O     0.19360   0.39189   0.98761   0.00000  Uiso   1.00
O211   O     0.00156   0.08471   0.50263   0.00000  Uiso   1.00
O212   O     0.13935   0.80446   0.77914   0.00000  Uiso   1.00
O213   O     0.19311   0.38358   0.63665   0.00000  Uiso   1.00
O214   O    -0.01264   0.08148   0.65605   0.00000  Uiso   1.00
O215   O     0.10836   0.81482   0.93113   0.00000  Uiso   1.00
C216   C     0.21717   0.39624   0.55917   0.00000  Uiso   1.00
C217   C     0.00934   0.09906   0.58136   0.00000  Uiso   1.00
C218   C     0.12575   0.77867   0.85362   0.00000  Uiso   1.00
C219   C     0.29415   0.38989   0.55761   0.00000  Uiso   1.00
C220   C     0.04736   0.13684   0.58609   0.00000  Uiso   1.00
C221   C     0.12268   0.70929   0.84838   0.00000  Uiso   1.00
C222   C     0.31515   0.39919   0.63963   0.00000  Uiso   1.00
C223   C     0.06539   0.14542   0.67074   0.00000  Uiso   1.00
C224   C     0.11521   0.67216   0.92777   0.00000  Uiso   1.00
H225   H     0.27342   0.41304   0.70240   0.00000  Uiso   1.00
H226   H     0.05443   0.12114   0.73145   0.00000  Uiso   1.00
H227   H     0.12426   0.68377   0.99283   0.00000  Uiso   1.00
C228   C     0.39027   0.38891   0.63902   0.00000  Uiso   1.00
C229   C     0.09356   0.18793   0.67574   0.00000  Uiso   1.00
C230   C     0.09005   0.62666   0.92217   0.00000  Uiso   1.00
H231   H     0.40774   0.39557   0.70123   0.00000  Uiso   1.00
H232   H     0.10246   0.19965   0.74085   0.00000  Uiso   1.00
H233   H     0.08006   0.60134   0.98270   0.00000  Uiso   1.00
C234   C     0.44402   0.37020   0.55649   0.00000  Uiso   1.00
C235   C     0.10464   0.22150   0.59586   0.00000  Uiso   1.00
C236   C     0.07146   0.61880   0.83730   0.00000  Uiso   1.00
C237   C     0.42198   0.36210   0.47443   0.00000  Uiso   1.00
C238   C     0.09439   0.20549   0.51081   0.00000  Uiso   1.00
C239   C     0.08854   0.64724   0.75734   0.00000  Uiso   1.00
H240   H     0.46270   0.34947   0.41145   0.00000  Uiso   1.00
H241   H     0.10485   0.23012   0.44996   0.00000  Uiso   1.00
H242   H     0.07762   0.63744   0.69241   0.00000  Uiso   1.00
C243   C     0.34719   0.37207   0.47484   0.00000  Uiso   1.00
C244   C     0.06560   0.16363   0.50564   0.00000  Uiso   1.00
C245   C     0.11369   0.69252   0.76281   0.00000  Uiso   1.00
H246   H     0.32976   0.36533   0.41285   0.00000  Uiso   1.00
H247   H     0.05487   0.15347   0.44087   0.00000  Uiso   1.00
H248   H     0.12144   0.72003   0.70270   0.00000  Uiso   1.00
C249   C     0.52224   0.36218   0.55494   0.00000  Uiso   1.00
C250   C     0.11516   0.28473   0.60003   0.00000  Uiso   1.00
C251   C     0.03088   0.58362   0.83080   0.00000  Uiso   1.00
O252   O     0.55449   0.35173   0.63027   0.00000  Uiso   1.00
O253   O     0.09961   0.31977   0.67722   0.00000  Uiso   1.00
O254   O     0.00420   0.56936   0.90407   0.00000  Uiso   1.00
O255   O     0.55215   0.36666   0.47658   0.00000  Uiso   1.00
O256   O     0.12923   0.30643   1.03512   0.00000  Uiso   1.00
O257   O     0.02416   0.56953   0.75124   0.00000  Uiso   1.00
O258   O     0.13728   0.36920   0.83023   0.00000  Uiso   1.00
O259   O    -0.01557   0.52150   0.58730   0.00000  Uiso   1.00
O260   O     0.13181   0.88214   0.57973   0.00000  Uiso   1.00
O261   O    -0.01860   1.02058   0.83619   0.00000  Uiso   1.00
H262   H     0.21213   0.31877   0.82526   0.00000  Uiso   1.00
H263   H    -0.07950   0.59777   0.58664   0.00000  Uiso   1.00
H264   H     0.20483   0.81214   0.57581   0.00000  Uiso   1.00
H265   H    -0.08242   1.09645   0.83273   0.00000  Uiso   1.00
C266   C     0.43198   0.16792   0.64456   0.00000  Uiso   1.00
C267   C     0.27944   0.61941   0.53516   0.00000  Uiso   1.00
O268   O     0.46174   0.13607   0.56900   0.00000  Uiso   1.00
O269   O     0.27153   0.65221   0.60287   0.00000  Uiso   1.00
O270   O     0.40317   0.19937   0.71979   0.00000  Uiso   1.00
O271   O     0.28748   0.58546   0.46870   0.00000  Uiso   1.00
Sc272  Sc    0.67505   0.81709   0.66581   0.00000  Uiso   1.00
Sc273  Sc    0.68306   0.81308   0.91301   0.00000  Uiso   1.00
O274   O     0.54331   0.88303   0.74112   0.00000  Uiso   1.00
O275   O     0.79921   0.79063   0.94136   0.00000  Uiso   1.00
O276   O     0.63471   0.44203   0.44576   0.00000  Uiso   1.00
O277   O     0.55618   0.84996   0.89180   0.00000  Uiso   1.00
O278   O     0.81027   0.75065   0.59103   0.00000  Uiso   1.00
O279   O     0.60072   0.45486   0.59780   0.00000  Uiso   1.00
C280   C     0.51914   0.86833   0.81656   0.00000  Uiso   1.00
C281   C     0.80836   0.79752   0.52499   0.00000  Uiso   1.00
C282   C     0.61842   0.47707   0.52369   0.00000  Uiso   1.00
C283   C     0.44209   0.87505   0.81570   0.00000  Uiso   1.00
C284   C     0.83617   0.84308   0.54457   0.00000  Uiso   1.00
C285   C     0.62494   0.54340   0.52918   0.00000  Uiso   1.00
C286   C     0.41929   0.85146   0.89491   0.00000  Uiso   1.00
C287   C     0.86821   0.82929   0.63102   0.00000  Uiso   1.00
C288   C     0.63256   0.56136   0.61477   0.00000  Uiso   1.00
H289   H     0.45863   0.82795   0.95522   0.00000  Uiso   1.00
H290   H     0.87314   0.78494   0.68186   0.00000  Uiso   1.00
H291   H     0.62706   0.53221   0.67491   0.00000  Uiso   1.00
C292   C     0.34573   0.85980   0.89580   0.00000  Uiso   1.00
C293   C     0.89256   0.87308   0.65009   0.00000  Uiso   1.00
C294   C     0.65236   0.61147   0.62044   0.00000  Uiso   1.00
H295   H     0.32781   0.84159   0.95629   0.00000  Uiso   1.00
H296   H     0.91598   0.86417   0.71635   0.00000  Uiso   1.00
H297   H     0.66040   0.62415   0.68542   0.00000  Uiso   1.00
C298   C     0.29444   0.89147   0.81670   0.00000  Uiso   1.00
C299   C     0.88619   0.93041   0.58333   0.00000  Uiso   1.00
C300   C     0.66625   0.64240   0.54040   0.00000  Uiso   1.00
C301   C     0.31721   0.91507   0.73724   0.00000  Uiso   1.00
C302   C     0.85258   0.94564   0.49732   0.00000  Uiso   1.00
C303   C     0.65200   0.63057   0.45534   0.00000  Uiso   1.00
H304   H     0.27655   0.94039   0.67738   0.00000  Uiso   1.00
H305   H     0.84809   0.98964   0.44641   0.00000  Uiso   1.00
H306   H     0.65993   0.65766   0.39489   0.00000  Uiso   1.00
C307   C     0.39128   0.90631   0.73624   0.00000  Uiso   1.00
C308   C     0.82809   0.90185   0.47826   0.00000  Uiso   1.00
C309   C     0.63198   0.58060   0.44975   0.00000  Uiso   1.00
H310   H     0.40944   0.92412   0.67560   0.00000  Uiso   1.00
H311   H     0.80491   0.91052   0.41195   0.00000  Uiso   1.00
H312   H     0.62598   0.56643   0.38448   0.00000  Uiso   1.00
C313   C     0.21645   0.89923   0.81775   0.00000  Uiso   1.00
C314   C     0.92207   0.96828   0.60199   0.00000  Uiso   1.00
C315   C     0.69836   0.68573   0.54532   0.00000  Uiso   1.00
O316   O     0.18567   0.89509   0.89572   0.00000  Uiso   1.00
O317   O     0.95444   0.95160   0.67939   0.00000  Uiso   1.00
O318   O     0.70608   0.70008   0.62408   0.00000  Uiso   1.00
O319   O     0.18479   0.90913   0.74206   0.00000  Uiso   1.00
O320   O     0.92238   1.01335   0.53600   0.00000  Uiso   1.00
O321   O     0.74708   0.67993   0.97376   0.00000  Uiso   1.00
O322   O     0.75449   0.74291   0.78510   0.00000  Uiso   1.00
O323   O     0.59695   0.90109   0.54414   0.00000  Uiso   1.00
H324   H     0.81991   0.66704   0.78415   0.00000  Uiso   1.00
H325   H     0.55372   0.97359   0.54769   0.00000  Uiso   1.00
C326   C     0.39022   0.75976   0.56678   0.00000  Uiso   1.00
O327   O     0.37255   0.71749   0.58045   0.00000  Uiso   1.00
O328   O     0.40814   0.80159   0.55301   0.00000  Uiso   1.00
C329   C     0.29164   0.12581   0.79427   0.00000  Uiso   1.00
O330   O     0.32232   0.12985   0.72496   0.00000  Uiso   1.00
O331   O     0.26224   0.11964   0.86333   0.00000  Uiso   1.00
C332   C     0.41539   0.15427  -0.03119   0.00000  Uiso   1.00
O333   O     0.37161   0.17135  -0.09207   0.00000  Uiso   1.00
O334   O     0.45939   0.13753   0.02961   0.00000  Uiso   1.00
C335   C     0.43597   0.63040   0.78546   0.00000  Uiso   1.00
O336   O     0.47576   0.65046   0.78542   0.00000  Uiso   1.00
O337   O     0.39442   0.61212   0.78606   0.00000  Uiso   1.00
C338   C     0.34422   0.63494  -0.01116   0.00000  Uiso   1.00
O339   O     0.32137   0.59747  -0.00220   0.00000  Uiso   1.00
O340   O     0.36664   0.67293  -0.02009   0.00000  Uiso   1.00
#===END of data_int(3.3)_AIMD

data_np(2.2)_AIMD
_symmetry_space_group_name_H-M    'P1'
_symmetry_Int_Tables_number       1
loop_
_symmetry_equiv_pos_as_xyz
  x,y,z
_cell_length_a                    19.7892
_cell_length_b                    15.8082
_cell_length_c                    14.8309
_cell_angle_alpha                 90.0000
_cell_angle_beta                  90.0000
_cell_angle_gamma                 90.0000
loop_
_atom_site_label
_atom_site_type_symbol
_atom_site_fract_x
_atom_site_fract_y
_atom_site_fract_z
_atom_site_U_iso_or_equiv
_atom_site_adp_type
_atom_site_occupancy
Sc1    Sc    0.50919   0.24475   0.17483   0.00000  Uiso   1.00
Sc2    Sc    0.50663   0.24838   0.42468   0.00000  Uiso   1.00
Sc3    Sc    0.99813   0.50646   0.42698   0.00000  Uiso   1.00
Sc4    Sc    0.99640   0.49224   0.17699   0.00000  Uiso   1.00
O5     O     0.42956   0.32537   0.22010   0.00000  Uiso   1.00
O6     O     0.58399   0.16887   0.47548   0.00000  Uiso   1.00
O7     O     0.08748   0.03577  -0.02355   0.00000  Uiso   1.00
O8     O     0.93881   0.39136   0.23144   0.00000  Uiso   1.00
O9     O     0.43235   0.33094   0.37376   0.00000  Uiso   1.00
O10    O     0.58817   0.16842   0.12409   0.00000  Uiso   1.00
O11    O     0.08604   0.04067   0.13018   0.00000  Uiso   1.00
O12    O     0.93545   0.40262   0.38422   0.00000  Uiso   1.00
C13    C     0.40257   0.34185   0.29738   0.00000  Uiso   1.00
C14    C     0.61802   0.15934   0.04747   0.00000  Uiso   1.00
C15    C     0.11597   0.04996   0.05312   0.00000  Uiso   1.00
C16    C     0.90676   0.38883   0.30753   0.00000  Uiso   1.00
C17    C     0.33088   0.37357   0.29805   0.00000  Uiso   1.00
C18    C     0.69219   0.13963   0.04863   0.00000  Uiso   1.00
C19    C     0.18939   0.07789   0.05396   0.00000  Uiso   1.00
C20    C     0.83134   0.37235   0.30558   0.00000  Uiso   1.00
C21    C     0.29976   0.39702   0.38064   0.00000  Uiso   1.00
C22    C     0.72556   0.12543   0.13206   0.00000  Uiso   1.00
C23    C     0.22253   0.09650   0.13680   0.00000  Uiso   1.00
C24    C     0.79345   0.37779   0.38674   0.00000  Uiso   1.00
H25    H     0.32964   0.39601   0.44239   0.00000  Uiso   1.00
H26    H     0.69612   0.12614   0.19418   0.00000  Uiso   1.00
H27    H     0.19404   0.09223   0.19961   0.00000  Uiso   1.00
H28    H     0.81997   0.39047   0.44974   0.00000  Uiso   1.00
C29    C     0.23106   0.41983   0.38196   0.00000  Uiso   1.00
C30    C     0.79560   0.11115   0.13337   0.00000  Uiso   1.00
C31    C     0.29151   0.11900   0.13746   0.00000  Uiso   1.00
C32    C     0.72287   0.36751   0.38465   0.00000  Uiso   1.00
H33    H     0.20603   0.43739   0.44469   0.00000  Uiso   1.00
H34    H     0.82232   0.09950   0.19641   0.00000  Uiso   1.00
H35    H     0.31711   0.13399   0.20063   0.00000  Uiso   1.00
H36    H     0.69293   0.37074   0.44626   0.00000  Uiso   1.00
C37    C     0.19310   0.41931   0.30068   0.00000  Uiso   1.00
C38    C     0.83279   0.11178   0.05141   0.00000  Uiso   1.00
C39    C     0.32883   0.12226   0.05558   0.00000  Uiso   1.00
C40    C     0.68955   0.35248   0.30124   0.00000  Uiso   1.00
C41    C     0.22468   0.39791   0.21775   0.00000  Uiso   1.00
C42    C     0.79927   0.12505  -0.03209   0.00000  Uiso   1.00
C43    C     0.29575   0.10424  -0.02724   0.00000  Uiso   1.00
C44    C     0.72744   0.34733   0.22007   0.00000  Uiso   1.00
H45    H     0.19486   0.39912   0.15595   0.00000  Uiso   1.00
H46    H     0.82877   0.12422  -0.09416   0.00000  Uiso   1.00
H47    H     0.32479   0.10643  -0.08968   0.00000  Uiso   1.00
H48    H     0.70101   0.33520   0.15689   0.00000  Uiso   1.00
C49    C     0.29333   0.37502   0.21644   0.00000  Uiso   1.00
C50    C     0.72903   0.13892  -0.03341   0.00000  Uiso   1.00
C51    C     0.22661   0.08309  -0.02787   0.00000  Uiso   1.00
C52    C     0.79812   0.35726   0.22223   0.00000  Uiso   1.00
H53    H     0.31827   0.35693   0.15379   0.00000  Uiso   1.00
H54    H     0.70237   0.15017  -0.09659   0.00000  Uiso   1.00
H55    H     0.20093   0.06838  -0.09104   0.00000  Uiso   1.00
H56    H     0.82814   0.35381   0.16070   0.00000  Uiso   1.00
C57    C     0.11904   0.44067   0.30223   0.00000  Uiso   1.00
C58    C     0.90723   0.09306   0.05329   0.00000  Uiso   1.00
C59    C     0.40284   0.14622   0.05577   0.00000  Uiso   1.00
C60    C     0.61433   0.33736   0.30000   0.00000  Uiso   1.00
O61    O     0.09138   0.45745   0.37862   0.00000  Uiso   1.00
O62    O     0.93553   0.08137   0.13066   0.00000  Uiso   1.00
O63    O     0.43235   0.15855   0.13262   0.00000  Uiso   1.00
O64    O     0.58406   0.33022   0.37638   0.00000  Uiso   1.00
O65    O     0.08722   0.44062   0.22605   0.00000  Uiso   1.00
O66    O     0.93932   0.08679  -0.02220   0.00000  Uiso   1.00
O67    O     0.42491   0.16463   0.46516   0.00000  Uiso   1.00
O68    O     0.58431   0.33055   0.22286   0.00000  Uiso   1.00
O69    O     0.51259   0.18539   0.30089   0.00000  Uiso   1.00
O70    O     0.50462   0.30316   0.04797   0.00000  Uiso   1.00
O71    O     1.00674   0.43091   0.05177   0.00000  Uiso   1.00
O72    O     0.98402   0.55848   0.29885   0.00000  Uiso   1.00
H73    H     0.50328   0.12450   0.30298   0.00000  Uiso   1.00
H74    H     0.50390   0.36510   0.04522   0.00000  Uiso   1.00
H75    H     1.02677   0.37421   0.05151   0.00000  Uiso   1.00
H76    H     0.95644   0.60995   0.29641   0.00000  Uiso   1.00
O77    O     0.49994   0.48586   0.09865   0.00000  Uiso   1.00
C78    C     0.49335   0.49442   0.17776   0.00000  Uiso   1.00
O79    O     0.48697   0.50268   0.25694   0.00000  Uiso   1.00
O80    O     1.08666   0.21353   0.26569   0.00000  Uiso   1.00
C81    C     1.07995   0.23336   0.18886   0.00000  Uiso   1.00
O82    O     1.07351   0.25313   0.11209   0.00000  Uiso   1.00
Sc83   Sc    0.47942   0.73852   0.18661   0.00000  Uiso   1.00
Sc84   Sc    0.48203   0.74365   0.43781   0.00000  Uiso   1.00
Sc85   Sc    0.99043   0.97833   0.42546   0.00000  Uiso   1.00
Sc86   Sc    0.99439   0.97833   0.17552   0.00000  Uiso   1.00
O87    O     0.39910   0.81377   0.23712   0.00000  Uiso   1.00
O88    O     0.56221   0.66964   0.48702   0.00000  Uiso   1.00
O89    O     0.05589   0.59213  -0.02888   0.00000  Uiso   1.00
O90    O     0.90027   0.91987   0.22076   0.00000  Uiso   1.00
O91    O     0.39784   0.81432   0.39103   0.00000  Uiso   1.00
O92    O     0.56221   0.66370   0.14065   0.00000  Uiso   1.00
O93    O     0.05185   0.59682   0.12424   0.00000  Uiso   1.00
O94    O     0.89991   0.92517   0.37447   0.00000  Uiso   1.00
C95    C     0.36863   0.82046   0.31382   0.00000  Uiso   1.00
C96    C     0.59192   0.65623   0.06347   0.00000  Uiso   1.00
C97    C     0.08417   0.60246   0.04870   0.00000  Uiso   1.00
C98    C     0.87036   0.91411   0.29802   0.00000  Uiso   1.00
C99    C     0.29376   0.83476   0.31164   0.00000  Uiso   1.00
C100   C     0.66392   0.62578   0.06165   0.00000  Uiso   1.00
C101   C     0.15957   0.61769   0.05173   0.00000  Uiso   1.00
C102   C     0.79555   0.89457   0.29991   0.00000  Uiso   1.00
C103   C     0.25663   0.83676   0.39349   0.00000  Uiso   1.00
C104   C     0.69592   0.59644   0.14142   0.00000  Uiso   1.00
C105   C     0.19318   0.62407   0.13616   0.00000  Uiso   1.00
C106   C     0.76013   0.89449   0.38334   0.00000  Uiso   1.00
H107   H     0.28359   0.83072   0.45721   0.00000  Uiso   1.00
H108   H     0.66699   0.59354   0.20394   0.00000  Uiso   1.00
H109   H     0.16319   0.62307   0.19781   0.00000  Uiso   1.00
H110   H     0.78810   0.90720   0.44520   0.00000  Uiso   1.00
C111   C     0.18609   0.84571   0.39088   0.00000  Uiso   1.00
C112   C     0.76440   0.57231   0.13908   0.00000  Uiso   1.00
C113   C     0.26411   0.63060   0.13949   0.00000  Uiso   1.00
C114   C     0.69032   0.87851   0.38527   0.00000  Uiso   1.00
H115   H     0.15608   0.84757   0.45246   0.00000  Uiso   1.00
H116   H     0.78980   0.54991   0.19977   0.00000  Uiso   1.00
H117   H     0.29045   0.63569   0.20380   0.00000  Uiso   1.00
H118   H     0.66251   0.87761   0.44871   0.00000  Uiso   1.00
C119   C     0.15286   0.85233   0.30637   0.00000  Uiso   1.00
C120   C     0.80137   0.57788   0.05735   0.00000  Uiso   1.00
C121   C     0.30245   0.63088   0.05840   0.00000  Uiso   1.00
C122   C     0.65498   0.86276   0.30365   0.00000  Uiso   1.00
C123   C     0.18998   0.85105   0.22452   0.00000  Uiso   1.00
C124   C     0.76891   0.60560  -0.02248   0.00000  Uiso   1.00
C125   C     0.26875   0.62528  -0.02608   0.00000  Uiso   1.00
C126   C     0.69013   0.86326   0.22007   0.00000  Uiso   1.00
H127   H     0.16298   0.85721   0.16083   0.00000  Uiso   1.00
H128   H     0.79808   0.60900  -0.08476   0.00000  Uiso   1.00
H129   H     0.29871   0.62639  -0.08776   0.00000  Uiso   1.00
H130   H     0.66216   0.85028   0.15824   0.00000  Uiso   1.00
C131   C     0.26050   0.84201   0.22715   0.00000  Uiso   1.00
C132   C     0.70059   0.62972  -0.02056   0.00000  Uiso   1.00
C133   C     0.19784   0.61859  -0.02941   0.00000  Uiso   1.00
C134   C     0.76010   0.87940   0.21822   0.00000  Uiso   1.00
H135   H     0.29038   0.83996   0.16549   0.00000  Uiso   1.00
H136   H     0.67525   0.65257  -0.08110   0.00000  Uiso   1.00
H137   H     0.17142   0.61329  -0.09366   0.00000  Uiso   1.00
H138   H     0.78786   0.88055   0.15468   0.00000  Uiso   1.00
C139   C     0.07817   0.86679   0.30355   0.00000  Uiso   1.00
C140   C     0.87528   0.55567   0.05564   0.00000  Uiso   1.00
C141   C     0.37827   0.64195   0.06177   0.00000  Uiso   1.00
C142   C     0.58097   0.84069   0.30675   0.00000  Uiso   1.00
O143   O     0.04647   0.87421   0.37908   0.00000  Uiso   1.00
O144   O     0.90478   0.54693   0.13248   0.00000  Uiso   1.00
O145   O     0.40678   0.64747   0.14028   0.00000  Uiso   1.00
O146   O     0.55330   0.83076   0.38472   0.00000  Uiso   1.00
O147   O     0.04979   0.87473   0.22552   0.00000  Uiso   1.00
O148   O     0.90429   0.54781  -0.02119   0.00000  Uiso   1.00
O149   O     0.41115   0.65306   0.48733   0.00000  Uiso   1.00
O150   O     0.54954   0.83063   0.23115   0.00000  Uiso   1.00
O151   O     0.48568   0.68073   0.31360   0.00000  Uiso   1.00
O152   O     0.46924   0.80131   0.06334   0.00000  Uiso   1.00
O153   O     0.98032   0.92004   0.05104   0.00000  Uiso   1.00
O154   O     1.00696   1.03692   0.30111   0.00000  Uiso   1.00
H155   H     0.48513   0.61878   0.31580   0.00000  Uiso   1.00
H156   H     0.45090   0.85886   0.06429   0.00000  Uiso   1.00
H157   H     0.95980   0.86367   0.04860   0.00000  Uiso   1.00
H158   H     1.02868   1.09259   0.30326   0.00000  Uiso   1.00
O159   O     0.42462   0.96935   0.12449   0.00000  Uiso   1.00
C160   C     0.44484   0.98599   0.19781   0.00000  Uiso   1.00
O161   O     0.46443   1.00296   0.27129   0.00000  Uiso   1.00
O162   O     0.90432   0.71465   0.24783   0.00000  Uiso   1.00
C163   C     0.90927   0.73146   0.17003   0.00000  Uiso   1.00
O164   O     0.91328   0.74774   0.09199   0.00000  Uiso   1.00
Sc165  Sc    0.50273   0.24153   0.67282   0.00000  Uiso   1.00
Sc166  Sc    0.50527   0.23968   0.92470   0.00000  Uiso   1.00
Sc167  Sc    0.99207   0.49174   0.92631   0.00000  Uiso   1.00
Sc168  Sc    0.99375   0.50056   0.67670   0.00000  Uiso   1.00
O169   O     0.42283   0.31414   0.72566   0.00000  Uiso   1.00
O170   O     0.58892   0.16828   0.97015   0.00000  Uiso   1.00
O171   O     0.08241   0.03518   0.47171   0.00000  Uiso   1.00
O172   O     0.92617   0.40240   0.71966   0.00000  Uiso   1.00
O173   O     0.42016   0.30863   0.87910   0.00000  Uiso   1.00
O174   O     0.58444   0.16418   0.62900   0.00000  Uiso   1.00
O175   O     0.08203   0.04088   0.62533   0.00000  Uiso   1.00
O176   O     0.92665   0.39732   0.87287   0.00000  Uiso   1.00
C177   C     0.39311   0.32520   0.80241   0.00000  Uiso   1.00
C178   C     0.61414   0.15874   0.55156   0.00000  Uiso   1.00
C179   C     0.11164   0.04844   0.54814   0.00000  Uiso   1.00
C180   C     0.89584   0.39307   0.79644   0.00000  Uiso   1.00
C181   C     0.32177   0.35749   0.80171   0.00000  Uiso   1.00
C182   C     0.68891   0.14152   0.55025   0.00000  Uiso   1.00
C183   C     0.18538   0.07421   0.54699   0.00000  Uiso   1.00
C184   C     0.82030   0.37904   0.79654   0.00000  Uiso   1.00
C185   C     0.28801   0.37243   0.88472   0.00000  Uiso   1.00
C186   C     0.72401   0.13100   0.63298   0.00000  Uiso   1.00
C187   C     0.21796   0.10001   0.62779   0.00000  Uiso   1.00
C188   C     0.78409   0.37976   0.87939   0.00000  Uiso   1.00
H189   H     0.31570   0.36401   0.94763   0.00000  Uiso   1.00
H190   H     0.69579   0.13352   0.69603   0.00000  Uiso   1.00
H191   H     0.18918   0.10114   0.69049   0.00000  Uiso   1.00
H192   H     0.81195   0.38864   0.94210   0.00000  Uiso   1.00
C193   C     0.21964   0.39624   0.88457   0.00000  Uiso   1.00
C194   C     0.79418   0.11750   0.63246   0.00000  Uiso   1.00
C195   C     0.28678   0.12392   0.62641   0.00000  Uiso   1.00
C196   C     0.71337   0.36945   0.87972   0.00000  Uiso   1.00
H197   H     0.19248   0.40769   0.94732   0.00000  Uiso   1.00
H198   H     0.82219   0.10804   0.69494   0.00000  Uiso   1.00
H199   H     0.31194   0.14456   0.68805   0.00000  Uiso   1.00
H200   H     0.68505   0.36946   0.94279   0.00000  Uiso   1.00
C201   C     0.18463   0.40447   0.80143   0.00000  Uiso   1.00
C202   C     0.82937   0.11445   0.54913   0.00000  Uiso   1.00
C203   C     0.32424   0.12218   0.54443   0.00000  Uiso   1.00
C204   C     0.67780   0.35864   0.79719   0.00000  Uiso   1.00
C205   C     0.21883   0.39195   0.71836   0.00000  Uiso   1.00
C206   C     0.79439   0.12515   0.46628   0.00000  Uiso   1.00
C207   C     0.29141   0.09604   0.46381   0.00000  Uiso   1.00
C208   C     0.71399   0.35842   0.71434   0.00000  Uiso   1.00
H209   H     0.19101   0.39995   0.65548   0.00000  Uiso   1.00
H210   H     0.82271   0.12206   0.40333   0.00000  Uiso   1.00
H211   H     0.32028   0.09463   0.40118   0.00000  Uiso   1.00
H212   H     0.68618   0.34962   0.65157   0.00000  Uiso   1.00
C213   C     0.28737   0.36847   0.71850   0.00000  Uiso   1.00
C214   C     0.72433   0.13894   0.46676   0.00000  Uiso   1.00
C215   C     0.22281   0.07204   0.46510   0.00000  Uiso   1.00
C216   C     0.78469   0.36884   0.71399   0.00000  Uiso   1.00
H217   H     0.31447   0.35693   0.65569   0.00000  Uiso   1.00
H218   H     0.69620   0.14788   0.40429   0.00000  Uiso   1.00
H219   H     0.19756   0.05138   0.40356   0.00000  Uiso   1.00
H220   H     0.81294   0.36909   0.65087   0.00000  Uiso   1.00
C221   C     0.11080   0.42649   0.80181   0.00000  Uiso   1.00
C222   C     0.90328   0.09378   0.54791   0.00000  Uiso   1.00
C223   C     0.39737   0.15021   0.54235   0.00000  Uiso   1.00
C224   C     0.60235   0.34281   0.79751   0.00000  Uiso   1.00
O225   O     0.08186   0.43503   0.87908   0.00000  Uiso   1.00
O226   O     0.93432   0.08634   0.62456   0.00000  Uiso   1.00
O227   O     0.42825   0.15910   0.61878   0.00000  Uiso   1.00
O228   O     0.57216   0.33520   0.87420   0.00000  Uiso   1.00
O229   O     0.08086   0.43591   0.72526   0.00000  Uiso   1.00
O230   O     0.93160   0.08162   0.47109   0.00000  Uiso   1.00
O231   O     0.43329   0.15341   0.97953   0.00000  Uiso   1.00
O232   O     0.57220   0.33564   0.72052   0.00000  Uiso   1.00
O233   O     0.51291   0.17982   0.79787   0.00000  Uiso   1.00
O234   O     0.50417   0.30742   0.55026   0.00000  Uiso   1.00
O235   O     1.00672   0.44264   0.55055   0.00000  Uiso   1.00
O236   O     0.98010   0.55661   0.80336   0.00000  Uiso   1.00
H237   H     0.53469   0.12425   0.79735   0.00000  Uiso   1.00
H238   H     0.49498   0.36829   0.55208   0.00000  Uiso   1.00
H239   H     1.00337   0.38083   0.54752   0.00000  Uiso   1.00
H240   H     0.96778   0.61651   0.80703   0.00000  Uiso   1.00
O241   O     0.46047   0.47518   0.61378   0.00000  Uiso   1.00
C242   C     0.47348   0.48633   0.69106   0.00000  Uiso   1.00
O243   O     0.48634   0.49750   0.76842   0.00000  Uiso   1.00
O244   O     0.99803   0.22530   0.74789   0.00000  Uiso   1.00
C245   C     0.99548   0.24192   0.66987   0.00000  Uiso   1.00
O246   O     0.99360   0.25871   0.59181   0.00000  Uiso   1.00
Sc247  Sc    0.48384   0.74170   0.68860   0.00000  Uiso   1.00
Sc248  Sc    0.48003   0.74186   0.93824   0.00000  Uiso   1.00
Sc249  Sc    0.99386   0.98314   0.92742   0.00000  Uiso   1.00
Sc250  Sc    0.99026   0.98346   0.67538   0.00000  Uiso   1.00
O251   O     0.39826   0.80902   0.73701   0.00000  Uiso   1.00
O252   O     0.56424   0.67474   0.98750   0.00000  Uiso   1.00
O253   O     0.05637   0.60746   0.48165   0.00000  Uiso   1.00
O254   O     0.89952   0.92607   0.73051   0.00000  Uiso   1.00
O255   O     0.39382   0.80812   0.89069   0.00000  Uiso   1.00
O256   O     0.56612   0.66882   0.64078   0.00000  Uiso   1.00
O257   O     0.05636   0.60243   0.63487   0.00000  Uiso   1.00
O258   O     0.89960   0.93072   0.88450   0.00000  Uiso   1.00
C259   C     0.36625   0.81535   0.81242   0.00000  Uiso   1.00
C260   C     0.59329   0.65883   0.56226   0.00000  Uiso   1.00
C261   C     0.08691   0.61225   0.55843   0.00000  Uiso   1.00
C262   C     0.86979   0.92100   0.80804   0.00000  Uiso   1.00
C263   C     0.29156   0.83118   0.80803   0.00000  Uiso   1.00
C264   C     0.66642   0.63452   0.55814   0.00000  Uiso   1.00
C265   C     0.16252   0.62566   0.55979   0.00000  Uiso   1.00
C266   C     0.79463   0.90285   0.80961   0.00000  Uiso   1.00
C267   C     0.25338   0.83339   0.88894   0.00000  Uiso   1.00
C268   C     0.70141   0.61326   0.63849   0.00000  Uiso   1.00
C269   C     0.19724   0.62973   0.64361   0.00000  Uiso   1.00
C270   C     0.76061   0.89238   0.89336   0.00000  Uiso   1.00
H271   H     0.27930   0.82517   0.95315   0.00000  Uiso   1.00
H272   H     0.67407   0.61308   0.70231   0.00000  Uiso   1.00
H273   H     0.16809   0.62812   0.70595   0.00000  Uiso   1.00
H274   H     0.78956   0.89757   0.95566   0.00000  Uiso   1.00
C275   C     0.18331   0.84595   0.88504   0.00000  Uiso   1.00
C276   C     0.77040   0.59284   0.63439   0.00000  Uiso   1.00
C277   C     0.26822   0.63535   0.64533   0.00000  Uiso   1.00
C278   C     0.69071   0.87549   0.89523   0.00000  Uiso   1.00
H279   H     0.15276   0.84850   0.94609   0.00000  Uiso   1.00
H280   H     0.79849   0.57563   0.69488   0.00000  Uiso   1.00
H281   H     0.29559   0.63952   0.70895   0.00000  Uiso   1.00
H282   H     0.66413   0.86659   0.95895   0.00000  Uiso   1.00
C283   C     0.15120   0.85541   0.80002   0.00000  Uiso   1.00
C284   C     0.80445   0.59439   0.55009   0.00000  Uiso   1.00
C285   C     0.30522   0.63621   0.56327   0.00000  Uiso   1.00
C286   C     0.65372   0.86934   0.81331   0.00000  Uiso   1.00
C287   C     0.18922   0.85315   0.71894   0.00000  Uiso   1.00
C288   C     0.76942   0.61495   0.46963   0.00000  Uiso   1.00
C289   C     0.27061   0.63235   0.47949   0.00000  Uiso   1.00
C290   C     0.68762   0.88057   0.72960   0.00000  Uiso   1.00
H291   H     0.16316   0.86100   0.65474   0.00000  Uiso   1.00
H292   H     0.79688   0.61547   0.40591   0.00000  Uiso   1.00
H293   H     0.29979   0.63371   0.41720   0.00000  Uiso   1.00
H294   H     0.65870   0.87544   0.66726   0.00000  Uiso   1.00
C295   C     0.25951   0.84115   0.72303   0.00000  Uiso   1.00
C296   C     0.70035   0.63525   0.47372   0.00000  Uiso   1.00
C297   C     0.19978   0.62764   0.47778   0.00000  Uiso   1.00
C298   C     0.75757   0.89727   0.72776   0.00000  Uiso   1.00
H299   H     0.29003   0.83847   0.66193   0.00000  Uiso   1.00
H300   H     0.67217   0.65231   0.41325   0.00000  Uiso   1.00
H301   H     0.17232   0.62407   0.41417   0.00000  Uiso   1.00
H302   H     0.78408   0.90612   0.66399   0.00000  Uiso   1.00
C303   C     0.07687   0.87176   0.79743   0.00000  Uiso   1.00
C304   C     0.87830   0.57300   0.54730   0.00000  Uiso   1.00
C305   C     0.38087   0.64704   0.56395   0.00000  Uiso   1.00
C306   C     0.57954   0.84634   0.81450   0.00000  Uiso   1.00
O307   O     0.04606   0.88006   0.87351   0.00000  Uiso   1.00
O308   O     0.90879   0.56418   0.62374   0.00000  Uiso   1.00
O309   O     0.41110   0.65240   0.64104   0.00000  Uiso   1.00
O310   O     0.54984   0.83581   0.89105   0.00000  Uiso   1.00
O311   O     0.04735   0.87967   0.72018   0.00000  Uiso   1.00
O312   O     0.90654   0.56418   0.46976   0.00000  Uiso   1.00
O313   O     0.41085   0.64768   0.98677   0.00000  Uiso   1.00
O314   O     0.54962   0.83637   0.73763   0.00000  Uiso   1.00
O315   O     0.49051   0.68081   0.81400   0.00000  Uiso   1.00
O316   O     0.47757   0.80351   0.56373   0.00000  Uiso   1.00
O317   O     0.97180   0.92391   0.55224   0.00000  Uiso   1.00
O318   O     1.00277   1.04213   0.80154   0.00000  Uiso   1.00
H319   H     0.49647   0.61929   0.81551   0.00000  Uiso   1.00
H320   H     0.46253   0.86255   0.56663   0.00000  Uiso   1.00
H321   H     0.95332   0.86639   0.55332   0.00000  Uiso   1.00
H322   H     1.00514   1.10409   0.80180   0.00000  Uiso   1.00
O323   O     0.42008   0.96958   0.62895   0.00000  Uiso   1.00
C324   C     0.41140   0.99176   0.70468   0.00000  Uiso   1.00
O325   O     0.40217   1.01394   0.78015   0.00000  Uiso   1.00
O326   O     0.90899   0.72502   0.76401   0.00000  Uiso   1.00
C327   C     0.90729   0.74208   0.68601   0.00000  Uiso   1.00
O328   O     0.90456   0.75885   0.60802   0.00000  Uiso   1.00
#===END of data_np(2.2)_AIMD

data_np(3.3)_AIMD
_symmetry_space_group_name_H-M    'P1'
_symmetry_Int_Tables_number       1
loop_
_symmetry_equiv_pos_as_xyz
  x,y,z
_cell_length_a                    21.0919
_cell_length_b                    21.7662
_cell_length_c                    14.7954
_cell_angle_alpha                 90.9677
_cell_angle_beta                  92.4594
_cell_angle_gamma                 44.5920
loop_
_atom_site_label
_atom_site_type_symbol
_atom_site_fract_x
_atom_site_fract_y
_atom_site_fract_z
_atom_site_U_iso_or_equiv
_atom_site_adp_type
_atom_site_occupancy
Sc1    Sc    0.62321   0.37632   0.43530   0.00000  Uiso   1.00
Sc2    Sc    0.62659   0.37311   0.18381   0.00000  Uiso   1.00
O3     O     0.67761   0.25218   0.23083   0.00000  Uiso   1.00
O4     O     0.68168   0.25288   0.38525   0.00000  Uiso   1.00
C5     C     0.67420   0.22880   0.30878   0.00000  Uiso   1.00
C6     C     0.65796   0.17161   0.30902   0.00000  Uiso   1.00
C7     C     0.65471   0.14246   0.39219   0.00000  Uiso   1.00
H8     H     0.66624   0.16030   0.45545   0.00000  Uiso   1.00
C9     C     0.63686   0.09128   0.39194   0.00000  Uiso   1.00
H10    H     0.63477   0.06780   0.45510   0.00000  Uiso   1.00
C11    C     0.62165   0.06917   0.30866   0.00000  Uiso   1.00
C12    C     0.62420   0.09889   0.22555   0.00000  Uiso   1.00
H13    H     0.61202   0.08165   0.16226   0.00000  Uiso   1.00
C14    C     0.64222   0.14992   0.22570   0.00000  Uiso   1.00
H15    H     0.64385   0.17380   0.16257   0.00000  Uiso   1.00
C16    C     0.60453   0.01277   0.30875   0.00000  Uiso   1.00
O17    O     0.60224  -0.01195   0.38603   0.00000  Uiso   1.00
O18    O     0.59405  -0.00853   0.23161   0.00000  Uiso   1.00
O19    O     0.68205   0.31572   0.05846   0.00000  Uiso   1.00
O20    O     0.56029   0.42942   0.30592   0.00000  Uiso   1.00
H21    H     0.74198   0.25531   0.05854   0.00000  Uiso   1.00
H22    H     0.49801   0.45693   0.30335   0.00000  Uiso   1.00
C23    C     0.35348   0.12370   0.00305   0.00000  Uiso   1.00
O24    O     0.39692   0.13795   0.02515   0.00000  Uiso   1.00
O25    O     0.30962   0.11020  -0.01898   0.00000  Uiso   1.00
O26    O     0.98413   0.44353   0.22529   0.00000  Uiso   1.00
O27    O     0.98633   0.45222   0.37898   0.00000  Uiso   1.00
C28    C     0.96302   0.43992   0.30444   0.00000  Uiso   1.00
C29    C     0.91088   0.41683   0.30939   0.00000  Uiso   1.00
C30    C     0.88339   0.41419   0.39416   0.00000  Uiso   1.00
H31    H     0.89885   0.43118   0.45499   0.00000  Uiso   1.00
C32    C     0.83700   0.39010   0.39788   0.00000  Uiso   1.00
H33    H     0.81418   0.38859   0.46173   0.00000  Uiso   1.00
C34    C     0.81855   0.36791   0.31719   0.00000  Uiso   1.00
C35    C     0.84741   0.36894   0.23285   0.00000  Uiso   1.00
H36    H     0.83243   0.35157   0.17197   0.00000  Uiso   1.00
C37    C     0.89362   0.39327   0.22901   0.00000  Uiso   1.00
H38    H     0.91692   0.39418   0.16519   0.00000  Uiso   1.00
C39    C     0.76279   0.34898   0.32035   0.00000  Uiso   1.00
O40    O     0.73438   0.35263   0.39740   0.00000  Uiso   1.00
O41    O     0.74373   0.33267   0.24554   0.00000  Uiso   1.00
Sc42   Sc    0.11085   0.38951   0.18258   0.00000  Uiso   1.00
Sc43   Sc    0.11870   0.38070   0.43418   0.00000  Uiso   1.00
Sc44   Sc    0.12278   0.87843   0.44494   0.00000  Uiso   1.00
Sc45   Sc    0.11926   0.88180   0.19425   0.00000  Uiso   1.00
O46    O     0.24464   0.31460   0.49736   0.00000  Uiso   1.00
O47    O     0.06672   0.00201  -0.00764   0.00000  Uiso   1.00
O48    O     0.16044   0.76522   0.23750   0.00000  Uiso   1.00
O49    O     0.23473   0.33651   0.13544   0.00000  Uiso   1.00
O50    O     0.07644   0.00073   0.14670   0.00000  Uiso   1.00
O51    O     0.16893   0.76222   0.39148   0.00000  Uiso   1.00
C52    C     0.25570   0.34322   0.05796   0.00000  Uiso   1.00
C53    C     0.07328   0.02801   0.06782   0.00000  Uiso   1.00
C54    C     0.16264   0.73713   0.31496   0.00000  Uiso   1.00
C55    C     0.31403   0.35931   0.05672   0.00000  Uiso   1.00
C56    C     0.07983   0.09282   0.06380   0.00000  Uiso   1.00
C57    C     0.15463   0.67375   0.31556   0.00000  Uiso   1.00
C58    C     0.35429   0.35539   0.13885   0.00000  Uiso   1.00
C59    C     0.09581   0.11712   0.14458   0.00000  Uiso   1.00
C60    C     0.16398   0.63498   0.39811   0.00000  Uiso   1.00
H61    H     0.34418   0.33853   0.20183   0.00000  Uiso   1.00
H62    H     0.10070   0.09021   0.20912   0.00000  Uiso   1.00
H63    H     0.18042   0.64919   0.46048   0.00000  Uiso   1.00
C64    C     0.40703   0.37264   0.13751   0.00000  Uiso   1.00
C65    C     0.10710   0.17342   0.14107   0.00000  Uiso   1.00
C66    C     0.15192   0.57912   0.39850   0.00000  Uiso   1.00
H67    H     0.43907   0.36955   0.19956   0.00000  Uiso   1.00
H68    H     0.12007   0.19167   0.20282   0.00000  Uiso   1.00
H69    H     0.15968   0.54829   0.46121   0.00000  Uiso   1.00
C70    C     0.41966   0.39390   0.05440   0.00000  Uiso   1.00
C71    C     0.10291   0.20638   0.05653   0.00000  Uiso   1.00
C72    C     0.12904   0.56261   0.31641   0.00000  Uiso   1.00
C73    C     0.37894   0.39844  -0.02765   0.00000  Uiso   1.00
C74    C     0.08537   0.18347  -0.02432   0.00000  Uiso   1.00
C75    C     0.12045   0.60093   0.23376   0.00000  Uiso   1.00
H76    H     0.38905   0.41525  -0.09062   0.00000  Uiso   1.00
H77    H     0.08134   0.20981  -0.08883   0.00000  Uiso   1.00
H78    H     0.10319   0.58728   0.17136   0.00000  Uiso   1.00
C79    C     0.32570   0.38169  -0.02619   0.00000  Uiso   1.00
C80    C     0.07398   0.12710  -0.02076   0.00000  Uiso   1.00
C81    C     0.13339   0.65608   0.23320   0.00000  Uiso   1.00
H82    H     0.29265   0.38602  -0.08789   0.00000  Uiso   1.00
H83    H     0.06116   0.10866  -0.08249   0.00000  Uiso   1.00
H84    H     0.12683   0.68596   0.17037   0.00000  Uiso   1.00
C85    C     0.47819   0.40978   0.05336   0.00000  Uiso   1.00
C86    C     0.11734   0.26513   0.05362   0.00000  Uiso   1.00
C87    C     0.11304   0.50516   0.31618   0.00000  Uiso   1.00
O88    O     0.50540   0.41514   0.13025   0.00000  Uiso   1.00
O89    O     0.13241   0.28374   0.12972   0.00000  Uiso   1.00
O90    O     0.11845   0.47356   0.39226   0.00000  Uiso   1.00
O91    O     0.49863   0.41704  -0.02400   0.00000  Uiso   1.00
O92    O     0.12304   0.28458   0.48040   0.00000  Uiso   1.00
O93    O     0.09443   0.49009   0.23991   0.00000  Uiso   1.00
O94    O     0.16706   0.31817   0.30776   0.00000  Uiso   1.00
O95    O     0.04535   0.45533   0.05779   0.00000  Uiso   1.00
O96    O     0.18511   0.82468   0.07061   0.00000  Uiso   1.00
O97    O     0.06110   0.94049   0.31871   0.00000  Uiso   1.00
H98    H     0.18838   0.26097   0.30249   0.00000  Uiso   1.00
H99    H    -0.02086   0.50255   0.05454   0.00000  Uiso   1.00
H100   H     0.24829   0.79468   0.07469   0.00000  Uiso   1.00
H101   H     0.00995   1.00432   0.32062   0.00000  Uiso   1.00
C102   C     0.37001   0.17360   0.26340   0.00000  Uiso   1.00
C103   C     0.32324   0.62297   0.07541   0.00000  Uiso   1.00
O104   O     0.34359   0.14630   0.22543   0.00000  Uiso   1.00
O105   O     0.36746   0.63730   0.09165   0.00000  Uiso   1.00
O106   O     0.39755   0.19971   0.30190   0.00000  Uiso   1.00
O107   O     0.28078   0.60684   0.05886   0.00000  Uiso   1.00
Sc108  Sc    0.61480   0.88467   0.18442   0.00000  Uiso   1.00
Sc109  Sc    0.61408   0.88821   0.43333   0.00000  Uiso   1.00
O110   O     0.48893   0.93892   0.22699   0.00000  Uiso   1.00
O111   O     0.74296   0.82139   0.49274   0.00000  Uiso   1.00
O112   O     0.57323   0.49576  -0.01341   0.00000  Uiso   1.00
O113   O     0.48210   0.95921   0.37885   0.00000  Uiso   1.00
O114   O     0.74635   0.81836   0.14103   0.00000  Uiso   1.00
O115   O     0.59070   0.48694   0.14038   0.00000  Uiso   1.00
C116   C     0.46258   0.94137   0.30533   0.00000  Uiso   1.00
C117   C     0.77177   0.82063   0.06442   0.00000  Uiso   1.00
C118   C     0.58461   0.51729   0.06273   0.00000  Uiso   1.00
C119   C     0.40990   0.91912   0.31087   0.00000  Uiso   1.00
C120   C     0.82957   0.83797   0.06465   0.00000  Uiso   1.00
C121   C     0.59286   0.58054   0.06145   0.00000  Uiso   1.00
C122   C     0.37495   0.92576   0.39441   0.00000  Uiso   1.00
C123   C     0.84259   0.86506   0.14525   0.00000  Uiso   1.00
C124   C     0.59982   0.60955   0.14448   0.00000  Uiso   1.00
H125   H     0.38464   0.94951   0.45318   0.00000  Uiso   1.00
H126   H     0.81330   0.86954   0.20713   0.00000  Uiso   1.00
H127   H     0.59722   0.58666   0.20776   0.00000  Uiso   1.00
C128   C     0.32843   0.90178   0.40001   0.00000  Uiso   1.00
C129   C     0.89164   0.88670   0.14433   0.00000  Uiso   1.00
C130   C     0.60829   0.66808   0.14421   0.00000  Uiso   1.00
H131   H     0.30031   0.90709   0.46332   0.00000  Uiso   1.00
H132   H     0.90208   0.90754   0.20568   0.00000  Uiso   1.00
H133   H     0.61262   0.69188   0.20721   0.00000  Uiso   1.00
C134   C     0.31665   0.87108   0.32222   0.00000  Uiso   1.00
C135   C     0.92807   0.88177   0.06262   0.00000  Uiso   1.00
C136   C     0.61016   0.69782   0.06039   0.00000  Uiso   1.00
C137   C     0.35309   0.86309   0.23903   0.00000  Uiso   1.00
C138   C     0.91568   0.85390  -0.01779   0.00000  Uiso   1.00
C139   C     0.60413   0.66800  -0.02243   0.00000  Uiso   1.00
H140   H     0.34474   0.83795   0.18054   0.00000  Uiso   1.00
H141   H     0.94479   0.84950  -0.07976   0.00000  Uiso   1.00
H142   H     0.60608   0.69130  -0.08584   0.00000  Uiso   1.00
C143   C     0.39983   0.88681   0.23329   0.00000  Uiso   1.00
C144   C     0.86668   0.83220  -0.01683   0.00000  Uiso   1.00
C145   C     0.59581   0.60937  -0.02218   0.00000  Uiso   1.00
H146   H     0.42901   0.88048   0.17041   0.00000  Uiso   1.00
H147   H     0.85615   0.81147  -0.07819   0.00000  Uiso   1.00
H148   H     0.59150   0.58569  -0.08512   0.00000  Uiso   1.00
C149   C     0.26268   0.84991   0.32755   0.00000  Uiso   1.00
C150   C     0.98233   0.90313   0.06156   0.00000  Uiso   1.00
C151   C     0.61842   0.76108   0.05845   0.00000  Uiso   1.00
O152   O     0.24019   0.84704   0.40601   0.00000  Uiso   1.00
O153   O     1.00184   0.91805   0.13730   0.00000  Uiso   1.00
O154   O     0.63025   0.78224   0.13469   0.00000  Uiso   1.00
O155   O     0.23988   0.83715   0.25253   0.00000  Uiso   1.00
O156   O     1.00822   0.90426  -0.01503   0.00000  Uiso   1.00
O157   O     0.61942   0.78816   0.46568   0.00000  Uiso   1.00
O158   O     0.67307   0.82394   0.31188   0.00000  Uiso   1.00
O159   O     0.56552   0.94762   0.05753   0.00000  Uiso   1.00
H160   H     0.72915   0.76139   0.31267   0.00000  Uiso   1.00
H161   H     0.53737   1.00777   0.05573   0.00000  Uiso   1.00
C162   C     0.40836   0.62895   0.29996   0.00000  Uiso   1.00
O163   O     0.37173   0.60776   0.31898   0.00000  Uiso   1.00
O164   O     0.44403   0.65102   0.28128   0.00000  Uiso   1.00
Sc165  Sc    0.61795   0.37898   0.93392   0.00000  Uiso   1.00
Sc166  Sc    0.61047   0.38538   0.68187   0.00000  Uiso   1.00
O167   O     0.64738   0.26982   0.72575   0.00000  Uiso   1.00
O168   O     0.66457   0.26167   0.87987   0.00000  Uiso   1.00
C169   C     0.65144   0.24127   0.80382   0.00000  Uiso   1.00
C170   C     0.63892   0.18115   0.80626   0.00000  Uiso   1.00
C171   C     0.65679   0.13675   0.88796   0.00000  Uiso   1.00
H172   H     0.68099   0.14574   0.94815   0.00000  Uiso   1.00
C173   C     0.64394   0.08159   0.89030   0.00000  Uiso   1.00
H174   H     0.65877   0.04601   0.95215   0.00000  Uiso   1.00
C175   C     0.61260   0.07053   0.81102   0.00000  Uiso   1.00
C176   C     0.59405   0.11555   0.72959   0.00000  Uiso   1.00
H177   H     0.56940   0.10705   0.66942   0.00000  Uiso   1.00
C178   C     0.60696   0.17063   0.72715   0.00000  Uiso   1.00
H179   H     0.59208   0.20621   0.66528   0.00000  Uiso   1.00
C180   C     0.60161   0.00945   0.81299   0.00000  Uiso   1.00
O181   O     0.60706  -0.02004   0.89086   0.00000  Uiso   1.00
O182   O     0.58835  -0.01036   0.73667   0.00000  Uiso   1.00
O183   O     0.67989   0.32119   0.56362   0.00000  Uiso   1.00
O184   O     0.55016   0.43947   0.80735   0.00000  Uiso   1.00
H185   H     0.73955   0.26078   0.57044   0.00000  Uiso   1.00
H186   H     0.48428   0.48106   0.80731   0.00000  Uiso   1.00
C187   C     0.34882   0.10271   0.57041   0.00000  Uiso   1.00
O188   O     0.37773   0.13207   0.59196   0.00000  Uiso   1.00
O189   O     0.31859   0.07473   0.54832   0.00000  Uiso   1.00
O190   O     0.97579   0.44712   0.71510   0.00000  Uiso   1.00
O191   O     0.97317   0.46007   0.86850   0.00000  Uiso   1.00
C192   C     0.95058   0.44743   0.79332   0.00000  Uiso   1.00
C193   C     0.89450   0.42881   0.79766   0.00000  Uiso   1.00
C194   C     0.87357   0.42024   0.88354   0.00000  Uiso   1.00
H195   H     0.89442   0.43206   0.94432   0.00000  Uiso   1.00
C196   C     0.82761   0.39580   0.88882   0.00000  Uiso   1.00
H197   H     0.81101   0.38844   0.95384   0.00000  Uiso   1.00
C198   C     0.80213   0.38011   0.80833   0.00000  Uiso   1.00
C199   C     0.82103   0.39057   0.72221   0.00000  Uiso   1.00
H200   H     0.79946   0.37942   0.66147   0.00000  Uiso   1.00
C201   C     0.86791   0.41423   0.71705   0.00000  Uiso   1.00
H202   H     0.88509   0.42094   0.65201   0.00000  Uiso   1.00
C203   C     0.75209   0.35508   0.81444   0.00000  Uiso   1.00
O204   O     0.73097   0.35151   0.89293   0.00000  Uiso   1.00
O205   O     0.73156   0.33921   0.74034   0.00000  Uiso   1.00
Sc206  Sc    0.10570   0.39291   0.68141   0.00000  Uiso   1.00
Sc207  Sc    0.09864   0.39705   0.93130   0.00000  Uiso   1.00
Sc208  Sc    0.11897   0.88018   0.94335   0.00000  Uiso   1.00
Sc209  Sc    0.11858   0.88454   0.69532   0.00000  Uiso   1.00
O210   O     0.22758   0.33835   0.98163   0.00000  Uiso   1.00
O211   O     0.06877   0.00240   0.49240   0.00000  Uiso   1.00
O212   O     0.15202   0.76983   0.73235   0.00000  Uiso   1.00
O213   O     0.23210   0.34245   0.64752   0.00000  Uiso   1.00
O214   O     0.07350   0.00287   0.64717   0.00000  Uiso   1.00
O215   O     0.16097   0.76609   0.88615   0.00000  Uiso   1.00
C216   C     0.26306   0.33407   0.57005   0.00000  Uiso   1.00
C217   C     0.07053   0.03059   0.56876   0.00000  Uiso   1.00
C218   C     0.15216   0.74307   0.80939   0.00000  Uiso   1.00
C219   C     0.32029   0.35103   0.56329   0.00000  Uiso   1.00
C220   C     0.07293   0.09823   0.56778   0.00000  Uiso   1.00
C221   C     0.13814   0.68408   0.80925   0.00000  Uiso   1.00
C222   C     0.32147   0.39482   0.63454   0.00000  Uiso   1.00
C223   C     0.09530   0.11642   0.64892   0.00000  Uiso   1.00
C224   C     0.13493   0.65468   0.89226   0.00000  Uiso   1.00
H225   H     0.28311   0.41277   0.69419   0.00000  Uiso   1.00
H226   H     0.10531   0.08476   0.71203   0.00000  Uiso   1.00
H227   H     0.14645   0.67228   0.95562   0.00000  Uiso   1.00
C228   C     0.37101   0.41521   0.62672   0.00000  Uiso   1.00
C229   C     0.10779   0.17188   0.64667   0.00000  Uiso   1.00
C230   C     0.11688   0.60362   0.89182   0.00000  Uiso   1.00
H231   H     0.37213   0.44952   0.68018   0.00000  Uiso   1.00
H232   H     0.12721   0.18458   0.70801   0.00000  Uiso   1.00
H233   H     0.11447   0.58036   0.95496   0.00000  Uiso   1.00
C234   C     0.42004   0.39149   0.54801   0.00000  Uiso   1.00
C235   C     0.09811   0.20973   0.56324   0.00000  Uiso   1.00
C236   C     0.10148   0.58164   0.80848   0.00000  Uiso   1.00
C237   C     0.41859   0.34793   0.47662   0.00000  Uiso   1.00
C238   C     0.07110   0.19515   0.48312   0.00000  Uiso   1.00
C239   C     0.10525   0.61063   0.72539   0.00000  Uiso   1.00
H240   H     0.45718   0.32973   0.41698   0.00000  Uiso   1.00
H241   H     0.06227   0.22590   0.41985   0.00000  Uiso   1.00
H242   H     0.09354   0.59315   0.66194   0.00000  Uiso   1.00
C243   C     0.36851   0.32801   0.48402   0.00000  Uiso   1.00
C244   C     0.05919   0.13928   0.48510   0.00000  Uiso   1.00
C245   C     0.12345   0.66159   0.72577   0.00000  Uiso   1.00
H246   H     0.36610   0.29507   0.42985   0.00000  Uiso   1.00
H247   H     0.04092   0.12565   0.42355   0.00000  Uiso   1.00
H248   H     0.12594   0.68478   0.66264   0.00000  Uiso   1.00
C249   C     0.47647   0.40949   0.54147   0.00000  Uiso   1.00
C250   C     0.11958   0.26252   0.55904   0.00000  Uiso   1.00
C251   C     0.08418   0.52519   0.80858   0.00000  Uiso   1.00
O252   O     0.49288   0.43083   0.61447   0.00000  Uiso   1.00
O253   O     0.13513   0.28160   0.63450   0.00000  Uiso   1.00
O254   O     0.08328   0.49916   0.88551   0.00000  Uiso   1.00
O255   O     0.50725   0.40161   0.46422   0.00000  Uiso   1.00
O256   O     0.11359   0.29378   0.97574   0.00000  Uiso   1.00
O257   O     0.07295   0.50430   0.73156   0.00000  Uiso   1.00
O258   O     0.15682   0.33107   0.80906   0.00000  Uiso   1.00
O259   O     0.05469   0.45026   0.55256   0.00000  Uiso   1.00
O260   O     0.18685   0.82697   0.57420   0.00000  Uiso   1.00
O261   O     0.06014   0.94537   0.81886   0.00000  Uiso   1.00
H262   H     0.19773   0.26751   0.81089   0.00000  Uiso   1.00
H263   H    -0.00930   0.50548   0.54474   0.00000  Uiso   1.00
H264   H     0.24893   0.79987   0.57859   0.00000  Uiso   1.00
H265   H     0.01745   1.00907   0.82303   0.00000  Uiso   1.00
C266   C     0.36677   0.21867   0.81098   0.00000  Uiso   1.00
C267   C     0.33750   0.62892   0.56667   0.00000  Uiso   1.00
O268   O     0.35632   0.17206   0.81890   0.00000  Uiso   1.00
O269   O     0.37582   0.65001   0.58022   0.00000  Uiso   1.00
O270   O     0.37988   0.26300   0.80285   0.00000  Uiso   1.00
O271   O     0.30016   0.60700   0.55332   0.00000  Uiso   1.00
Sc272  Sc    0.61066   0.88473   0.68237   0.00000  Uiso   1.00
Sc273  Sc    0.61525   0.88145   0.93350   0.00000  Uiso   1.00
O274   O     0.48113   0.94569   0.72196   0.00000  Uiso   1.00
O275   O     0.74826   0.81153   0.98718   0.00000  Uiso   1.00
O276   O     0.56829   0.49717   0.48613   0.00000  Uiso   1.00
O277   O     0.48505   0.95655   0.87475   0.00000  Uiso   1.00
O278   O     0.74362   0.82461   0.64660   0.00000  Uiso   1.00
O279   O     0.57753   0.49972   0.63978   0.00000  Uiso   1.00
C280   C     0.45719   0.94725   0.80159   0.00000  Uiso   1.00
C281   C     0.76791   0.82874   0.57000   0.00000  Uiso   1.00
C282   C     0.57488   0.52506   0.56016   0.00000  Uiso   1.00
C283   C     0.39824   0.93223   0.80919   0.00000  Uiso   1.00
C284   C     0.82628   0.84548   0.56980   0.00000  Uiso   1.00
C285   C     0.58171   0.58938   0.55346   0.00000  Uiso   1.00
C286   C     0.37271   0.92982   0.89535   0.00000  Uiso   1.00
C287   C     0.85606   0.85428   0.65240   0.00000  Uiso   1.00
C288   C     0.57371   0.63232   0.63231   0.00000  Uiso   1.00
H289   H     0.39065   0.94556   0.95504   0.00000  Uiso   1.00
H290   H     0.83896   0.84560   0.71621   0.00000  Uiso   1.00
H291   H     0.55932   0.62073   0.69599   0.00000  Uiso   1.00
C292   C     0.32615   0.90594   0.90240   0.00000  Uiso   1.00
C293   C     0.90618   0.87473   0.65125   0.00000  Uiso   1.00
C294   C     0.58461   0.68891   0.62785   0.00000  Uiso   1.00
H295   H     0.30608   0.90344   0.96783   0.00000  Uiso   1.00
H296   H     0.92933   0.88173   0.71411   0.00000  Uiso   1.00
H297   H     0.57834   0.72228   0.68801   0.00000  Uiso   1.00
C298   C     0.30549   0.88387   0.82353   0.00000  Uiso   1.00
C299   C     0.92741   0.88647   0.56749   0.00000  Uiso   1.00
C300   C     0.60418   0.70319   0.54459   0.00000  Uiso   1.00
C301   C     0.32936   0.88831   0.73727   0.00000  Uiso   1.00
C302   C     0.89829   0.87695   0.48491   0.00000  Uiso   1.00
C303   C     0.61076   0.66137   0.46533   0.00000  Uiso   1.00
H304   H     0.31262   0.87152   0.67749   0.00000  Uiso   1.00
H305   H     0.91549   0.88556   0.42112   0.00000  Uiso   1.00
H306   H     0.62529   0.67308   0.40170   0.00000  Uiso   1.00
C307   C     0.37548   0.91240   0.73004   0.00000  Uiso   1.00
C308   C     0.84771   0.85708   0.48605   0.00000  Uiso   1.00
C309   C     0.59955   0.60482   0.46970   0.00000  Uiso   1.00
H310   H     0.39566   0.91478   0.66467   0.00000  Uiso   1.00
H311   H     0.82393   0.85078   0.42321   0.00000  Uiso   1.00
H312   H     0.60516   0.57185   0.40949   0.00000  Uiso   1.00
C313   C     0.25778   0.85610   0.82942   0.00000  Uiso   1.00
C314   C     0.98294   0.90646   0.56646   0.00000  Uiso   1.00
C315   C     0.61765   0.76284   0.54269   0.00000  Uiso   1.00
O316   O     0.23762   0.84975   0.90740   0.00000  Uiso   1.00
O317   O     0.99952   0.92404   0.64195   0.00000  Uiso   1.00
O318   O     0.62647   0.78609   0.61952   0.00000  Uiso   1.00
O319   O     0.23951   0.83928   0.75380   0.00000  Uiso   1.00
O320   O     1.01171   0.90456   0.49035   0.00000  Uiso   1.00
O321   O     0.61383   0.79057   0.98096   0.00000  Uiso   1.00
O322   O     0.66628   0.81907   0.80848   0.00000  Uiso   1.00
O323   O     0.56133   0.95211   0.55757   0.00000  Uiso   1.00
H324   H     0.72927   0.76157   0.80972   0.00000  Uiso   1.00
H325   H     0.53195   1.01261   0.56081   0.00000  Uiso   1.00
C326   C     0.41301   0.64763   0.80218   0.00000  Uiso   1.00
O327   O     0.37328   0.62782   0.79169   0.00000  Uiso   1.00
O328   O     0.45166   0.66848   0.81331   0.00000  Uiso   1.00
O329   O     0.84772   0.64857   0.75337   0.00000  Uiso   1.00
C330   C     0.85290   0.63429   0.67479   0.00000  Uiso   1.00
O331   O     0.85808   0.61963   0.59630   0.00000  Uiso   1.00
O332   O     0.83354   0.58807   0.06958   0.00000  Uiso   1.00
C333   C     0.82505   0.61328   0.14455   0.00000  Uiso   1.00
O334   O     0.81752   0.63764   0.21930   0.00000  Uiso   1.00
O335   O     0.91105   0.14387   0.78981   0.00000  Uiso   1.00
C336   C     0.88678   0.15125   0.71302   0.00000  Uiso   1.00
O337   O     0.86353   0.15744   0.63636   0.00000  Uiso   1.00
O338   O     0.86980   0.15890   0.12075   0.00000  Uiso   1.00
C339   C     0.88477   0.14514   0.20005   0.00000  Uiso   1.00
O340   O     0.90063   0.13060   0.27930   0.00000  Uiso   1.00
#===END of data_np(3.3)_AIMD

data_lp(17.6)_AIMD
_symmetry_space_group_name_H-M    'P1'
_symmetry_Int_Tables_number       1
loop_
_symmetry_equiv_pos_as_xyz
  x,y,z
_cell_length_a                    17.1552
_cell_length_b                    26.8843
_cell_length_c                    14.7080
_cell_angle_alpha                 90.0000
_cell_angle_beta                  90.0000
_cell_angle_gamma                 90.0000
loop_
_atom_site_label
_atom_site_type_symbol
_atom_site_fract_x
_atom_site_fract_y
_atom_site_fract_z
_atom_site_U_iso_or_equiv
_atom_site_adp_type
_atom_site_occupancy
Sc1    Sc    0.00088   1.00041   0.50510   0.00000  Uiso   1.00
Sc2    Sc    0.50276   0.75020   0.00013   0.00000  Uiso   1.00
Sc3    Sc    0.50219   0.75249   0.25091   0.00000  Uiso   1.00
Sc4    Sc   -0.00002   1.00266   0.25519   0.00000  Uiso   1.00
O5     O     0.42938   0.80949   0.45563   0.00000  Uiso   1.00
O6     O     0.07564   0.55867   0.05199   0.00000  Uiso   1.00
O7     O     0.92331   0.94774   0.30504   0.00000  Uiso   1.00
O8     O     0.57886   0.69753   0.20085   0.00000  Uiso   1.00
O9     O     0.58057   0.69569   0.04510   0.00000  Uiso   1.00
O10    O     0.92657   0.94475   0.45772   0.00000  Uiso   1.00
O11    O     0.07701   0.55843   0.20898   0.00000  Uiso   1.00
O12    O     0.43230   0.80856   0.30118   0.00000  Uiso   1.00
C13    C     0.40134   0.81978   0.37680   0.00000  Uiso   1.00
C14    C     0.10297   0.57054   0.12883   0.00000  Uiso   1.00
C15    C     0.89624   0.93256   0.38113   0.00000  Uiso   1.00
C16    C     0.60746   0.68210   0.12348   0.00000  Uiso   1.00
C17    C     0.33116   0.85417   0.37801   0.00000  Uiso   1.00
C18    C     0.17004   0.60582   0.12961   0.00000  Uiso   1.00
C19    C     0.82992   0.89794   0.37788   0.00000  Uiso   1.00
C20    C     0.67446   0.64915   0.12401   0.00000  Uiso   1.00
C21    C     0.29562   0.86581   0.46259   0.00000  Uiso   1.00
C22    C     0.20738   0.61831   0.04666   0.00000  Uiso   1.00
C23    C     0.79901   0.88215   0.29378   0.00000  Uiso   1.00
C24    C     0.70678   0.63416   0.20999   0.00000  Uiso   1.00
C25    C     0.71099   0.63444   0.04281   0.00000  Uiso   1.00
C26    C     0.80049   0.88150   0.46269   0.00000  Uiso   1.00
C27    C     0.20532   0.62225   0.21517   0.00000  Uiso   1.00
C28    C     0.29824   0.87149   0.29477   0.00000  Uiso   1.00
H29    H     0.83190   0.89385   0.52236   0.00000  Uiso   1.00
H30    H     0.69031   0.64879  -0.02146   0.00000  Uiso   1.00
H31    H     0.32773   0.85920   0.23107   0.00000  Uiso   1.00
H32    H     0.17636   0.60987   0.27896   0.00000  Uiso   1.00
H33    H     0.17699   0.60800  -0.01544   0.00000  Uiso   1.00
H34    H     0.32670   0.85900   0.52508   0.00000  Uiso   1.00
H35    H     0.67745   0.63845   0.27432   0.00000  Uiso   1.00
H36    H     0.81489   0.89669   0.22858   0.00000  Uiso   1.00
O37    O     0.09634   0.95693   0.45716   0.00000  Uiso   1.00
O38    O     0.40819   0.70851   0.04834   0.00000  Uiso   1.00
O39    O     0.60156   0.79062   0.29695   0.00000  Uiso   1.00
O40    O     0.90185   0.54135   0.20977   0.00000  Uiso   1.00
O41    O     0.90740   0.54065   0.05760   0.00000  Uiso   1.00
O42    O     0.60059   0.79084   0.45326   0.00000  Uiso   1.00
O43    O     0.40938   0.70768   0.20438   0.00000  Uiso   1.00
O44    O     0.09649   0.95985   0.30283   0.00000  Uiso   1.00
C45    C     0.12559   0.94812   0.37971   0.00000  Uiso   1.00
C46    C     0.38251   0.69359   0.12680   0.00000  Uiso   1.00
C47    C     0.62774   0.80464   0.37331   0.00000  Uiso   1.00
C48    C     0.87584   0.55315   0.13230   0.00000  Uiso   1.00
C49    C     0.19554   0.91405   0.37974   0.00000  Uiso   1.00
C50    C     0.31016   0.66200   0.12666   0.00000  Uiso   1.00
C51    C     0.69596   0.84028   0.37862   0.00000  Uiso   1.00
C52    C     0.80466   0.58490   0.12877   0.00000  Uiso   1.00
C53    C     0.23170   0.89945   0.46338   0.00000  Uiso   1.00
C54    C     0.27206   0.64870   0.04323   0.00000  Uiso   1.00
C55    C     0.72932   0.85489   0.29447   0.00000  Uiso   1.00
C56    C     0.77079   0.60160   0.21070   0.00000  Uiso   1.00
C57    C     0.77741   0.60274   0.04510   0.00000  Uiso   1.00
C58    C     0.73205   0.85136   0.46412   0.00000  Uiso   1.00
C59    C     0.27320   0.65181   0.21114   0.00000  Uiso   1.00
C60    C     0.22900   0.90005   0.29453   0.00000  Uiso   1.00
H61    H     0.69651   0.83814   0.52429   0.00000  Uiso   1.00
H62    H     0.80613   0.59237  -0.01604   0.00000  Uiso   1.00
H63    H     0.20669   0.91312   0.22758   0.00000  Uiso   1.00
H64    H     0.29940   0.66635   0.27420   0.00000  Uiso   1.00
H65    H     0.29959   0.65370  -0.02236   0.00000  Uiso   1.00
H66    H     0.20615   0.91365   0.52348   0.00000  Uiso   1.00
H67    H     0.79239   0.59167   0.27845   0.00000  Uiso   1.00
H68    H     0.70990   0.84291   0.22928   0.00000  Uiso   1.00
O69    O     0.00139   1.04195   0.37827   0.00000  Uiso   1.00
O70    O     0.50117   0.78849   0.12223   0.00000  Uiso   1.00
O71    O     0.48643   0.71722   0.37482   0.00000  Uiso   1.00
O72    O     0.01882   0.96694   0.62824   0.00000  Uiso   1.00
H73    H     0.44378   0.69218   0.37100   0.00000  Uiso   1.00
H74    H     0.48364   0.82291   0.11989   0.00000  Uiso   1.00
H75    H     0.06037   0.94039   0.63196   0.00000  Uiso   1.00
H76    H     0.04303   1.06495   0.38204   0.00000  Uiso   1.00
O77    O     0.45451   0.58960   0.54634   0.00000  Uiso   1.00
C78    C     0.51266   0.58107   0.50332   0.00000  Uiso   1.00
O79    O     0.56883   0.57386   0.45684   0.00000  Uiso   1.00
O80    O     0.35797   1.00030   0.44408   0.00000  Uiso   1.00
C81    C     0.30302   1.01972   0.40864   0.00000  Uiso   1.00
O82    O     0.24735   1.03912   0.37531   0.00000  Uiso   1.00
O83    O     0.14495   0.77082   0.21803   0.00000  Uiso   1.00
C84    C     0.19612   0.77589   0.16483   0.00000  Uiso   1.00
O85    O     0.24574   0.78100   0.10850   0.00000  Uiso   1.00
O86    O     0.74604   0.77171   0.12864   0.00000  Uiso   1.00
C87    C     0.80044   0.74522   0.11873   0.00000  Uiso   1.00
O88    O     0.85601   0.71838   0.11547   0.00000  Uiso   1.00
O89    O     0.77331   0.51260   0.39644   0.00000  Uiso   1.00
C90    C     0.71233   0.50004   0.36575   0.00000  Uiso   1.00
O91    O     0.65318   0.48354   0.33623   0.00000  Uiso   1.00
O92    O     0.53997   0.57162   0.20630   0.00000  Uiso   1.00
C93    C     0.49139   0.58593   0.26022   0.00000  Uiso   1.00
O94    O     0.44608   0.60073   0.31462   0.00000  Uiso   1.00
O95    O     0.76132   0.72306   0.34075   0.00000  Uiso   1.00
C96    C     0.80591   0.73116   0.40293   0.00000  Uiso   1.00
O97    O     0.84802   0.73758   0.46617   0.00000  Uiso   1.00
O98    O     0.63787   0.92369   0.15889   0.00000  Uiso   1.00
C99    C     0.67803   0.95450   0.12705   0.00000  Uiso   1.00
O100   O     0.72232   0.98462   0.09799   0.00000  Uiso   1.00
O101   O    -0.01255   0.65620  -0.00241   0.00000  Uiso   1.00
C102   C     0.02046   0.69044   0.02556   0.00000  Uiso   1.00
O103   O     0.05485   0.72566   0.05612   0.00000  Uiso   1.00
O104   O     0.43765   0.90333   0.11672   0.00000  Uiso   1.00
C105   C     0.46787   0.93857   0.08116   0.00000  Uiso   1.00
O106   O     0.49630   0.97497   0.05176   0.00000  Uiso   1.00
O107   O     0.25317   0.73489   0.38062   0.00000  Uiso   1.00
C108   C     0.19697   0.75495   0.41040   0.00000  Uiso   1.00
O109   O     0.13719   0.77448   0.43676   0.00000  Uiso   1.00
O110   O     1.03090   0.84891  -0.14194   0.00000  Uiso   1.00
C111   C     0.99643   0.83829  -0.20998   0.00000  Uiso   1.00
O112   O     0.96540   0.82348  -0.27823   0.00000  Uiso   1.00
O113   O     0.91513   0.65361   0.30704   0.00000  Uiso   1.00
C114   C     0.98167   0.66278   0.27941   0.00000  Uiso   1.00
O115   O     1.04671   0.66949   0.25422   0.00000  Uiso   1.00
O116   O     0.35501   0.53010   0.19380   0.00000  Uiso   1.00
C117   C     0.30367   0.50841   0.15677   0.00000  Uiso   1.00
O118   O     0.24761   0.48849   0.11956   0.00000  Uiso   1.00
C119   C     0.51160   0.93860   0.33684   0.00000  Uiso   1.00
O120   O     0.51141   0.90157   0.38049   0.00000  Uiso   1.00
O121   O     0.50962   0.97466   0.29155   0.00000  Uiso   1.00
O122   O     0.06991   0.85054   0.07894   0.00000  Uiso   1.00
C123   C     0.00377   0.84072   0.06133   0.00000  Uiso   1.00
O124   O    -0.06166   0.83049   0.04708   0.00000  Uiso   1.00
Sc125  Sc   -0.00146   1.00218   1.00505   0.00000  Uiso   1.00
Sc126  Sc    0.50224   0.74912   0.49749   0.00000  Uiso   1.00
Sc127  Sc    0.50338   0.75326   0.75118   0.00000  Uiso   1.00
Sc128  Sc    0.00299   1.00139   0.75708   0.00000  Uiso   1.00
O129   O     0.43574   0.80794   0.95454   0.00000  Uiso   1.00
O130   O     0.07031   0.56135   0.55275   0.00000  Uiso   1.00
O131   O     0.92689   0.94903   0.80577   0.00000  Uiso   1.00
O132   O     0.57934   0.69962   0.70283   0.00000  Uiso   1.00
O133   O     0.58069   0.69501   0.54658   0.00000  Uiso   1.00
O134   O     0.92500   0.94530   0.96107   0.00000  Uiso   1.00
O135   O     0.07208   0.56262   0.70831   0.00000  Uiso   1.00
O136   O     0.42990   0.81219   0.80008   0.00000  Uiso   1.00
C137   C     0.40166   0.82221   0.87832   0.00000  Uiso   1.00
C138   C     0.10049   0.57482   0.62994   0.00000  Uiso   1.00
C139   C     0.89662   0.93481   0.88108   0.00000  Uiso   1.00
C140   C     0.60534   0.68357   0.62613   0.00000  Uiso   1.00
C141   C     0.32966   0.85417   0.87938   0.00000  Uiso   1.00
C142   C     0.17070   0.60593   0.62773   0.00000  Uiso   1.00
C143   C     0.83026   0.89913   0.87763   0.00000  Uiso   1.00
C144   C     0.67539   0.64961   0.62634   0.00000  Uiso   1.00
C145   C     0.29605   0.86882   0.96189   0.00000  Uiso   1.00
C146   C     0.20672   0.62080   0.54167   0.00000  Uiso   1.00
C147   C     0.79588   0.88451   0.79549   0.00000  Uiso   1.00
C148   C     0.70819   0.63593   0.71284   0.00000  Uiso   1.00
C149   C     0.71066   0.63359   0.54530   0.00000  Uiso   1.00
C150   C     0.79649   0.88498   0.96524   0.00000  Uiso   1.00
C151   C     0.20304   0.62320   0.70757   0.00000  Uiso   1.00
C152   C     0.29867   0.86934   0.79646   0.00000  Uiso   1.00
H153   H     0.81923   0.90260   1.02374   0.00000  Uiso   1.00
H154   H     0.68122   0.64512   0.48133   0.00000  Uiso   1.00
H155   H     0.32612   0.85311   0.73781   0.00000  Uiso   1.00
H156   H     0.17533   0.61253   0.77321   0.00000  Uiso   1.00
H157   H     0.18429   0.61261   0.47755   0.00000  Uiso   1.00
H158   H     0.32139   0.85327   1.02695   0.00000  Uiso   1.00
H159   H     0.68220   0.64825   0.77680   0.00000  Uiso   1.00
H160   H     0.82154   0.90031   0.73221   0.00000  Uiso   1.00
O161   O     0.09791   0.95905   0.96077   0.00000  Uiso   1.00
O162   O     0.40751   0.70760   0.54724   0.00000  Uiso   1.00
O163   O     0.60224   0.78955   0.79623   0.00000  Uiso   1.00
O164   O     0.90317   0.53752   0.70698   0.00000  Uiso   1.00
O165   O     0.90226   0.53948   0.55028   0.00000  Uiso   1.00
O166   O     0.60189   0.78779   0.95077   0.00000  Uiso   1.00
O167   O     0.40864   0.70866   0.70105   0.00000  Uiso   1.00
O168   O     0.09399   0.95467   0.80505   0.00000  Uiso   1.00
C169   C     0.12141   0.94308   0.88377   0.00000  Uiso   1.00
C170   C     0.38027   0.69497   0.62549   0.00000  Uiso   1.00
C171   C     0.62917   0.80353   0.87504   0.00000  Uiso   1.00
C172   C     0.87545   0.55400   0.63072   0.00000  Uiso   1.00
C173   C     0.19627   0.91427   0.88189   0.00000  Uiso   1.00
C174   C     0.30835   0.66453   0.62678   0.00000  Uiso   1.00
C175   C     0.69823   0.83676   0.87772   0.00000  Uiso   1.00
C176   C     0.80888   0.58835   0.62812   0.00000  Uiso   1.00
C177   C     0.23007   0.89896   0.96685   0.00000  Uiso   1.00
C178   C     0.27525   0.65025   0.54220   0.00000  Uiso   1.00
C179   C     0.72929   0.85234   0.79631   0.00000  Uiso   1.00
C180   C     0.77329   0.60481   0.71459   0.00000  Uiso   1.00
C181   C     0.77681   0.60382   0.54630   0.00000  Uiso   1.00
C182   C     0.73022   0.85282   0.96222   0.00000  Uiso   1.00
C183   C     0.27518   0.64964   0.70934   0.00000  Uiso   1.00
C184   C     0.22890   0.89793   0.79581   0.00000  Uiso   1.00
H185   H     0.69983   0.83978   1.01979   0.00000  Uiso   1.00
H186   H     0.80696   0.59477   0.48408   0.00000  Uiso   1.00
H187   H     0.20574   0.91089   0.73330   0.00000  Uiso   1.00
H188   H     0.29523   0.66165   0.77413   0.00000  Uiso   1.00
H189   H     0.30333   0.66146   0.48050   0.00000  Uiso   1.00
H190   H     0.19900   0.90824   1.03207   0.00000  Uiso   1.00
H191   H     0.79740   0.59103   0.77846   0.00000  Uiso   1.00
H192   H     0.69873   0.84084   0.73368   0.00000  Uiso   1.00
O193   O     0.00180   1.04050   0.88139   0.00000  Uiso   1.00
O194   O     0.50209   0.78877   0.62635   0.00000  Uiso   1.00
O195   O     0.48523   0.71781   0.87139   0.00000  Uiso   1.00
O196   O     0.01833   0.96586   1.13080   0.00000  Uiso   1.00
H197   H     0.45152   0.68870   0.87488   0.00000  Uiso   1.00
H198   H     0.48809   0.82375   0.63609   0.00000  Uiso   1.00
H199   H     0.06074   0.94142   1.12262   0.00000  Uiso   1.00
H200   H     0.02040   1.07549   0.88291   0.00000  Uiso   1.00
O201   O     0.44405   0.59380   1.03402   0.00000  Uiso   1.00
C202   C     0.50348   0.58347   0.99464   0.00000  Uiso   1.00
O203   O     0.56436   0.57655   0.95843   0.00000  Uiso   1.00
O204   O     0.35684   0.99915   0.94202   0.00000  Uiso   1.00
C205   C     0.30514   1.02160   0.90731   0.00000  Uiso   1.00
O206   O     0.25483   1.04317   0.86980   0.00000  Uiso   1.00
O207   O     0.12694   0.75736   0.69100   0.00000  Uiso   1.00
C208   C     0.18531   0.77169   0.65667   0.00000  Uiso   1.00
O209   O     0.24428   0.78492   0.61915   0.00000  Uiso   1.00
O210   O     0.73201   0.76544   0.62399   0.00000  Uiso   1.00
C211   C     0.79374   0.75301   0.65567   0.00000  Uiso   1.00
O212   O     0.85454   0.73573   0.68372   0.00000  Uiso   1.00
O213   O     0.74745   0.52526   0.88447   0.00000  Uiso   1.00
C214   C     0.69671   0.49611   0.90421   0.00000  Uiso   1.00
O215   O     0.64945   0.46515   0.92127   0.00000  Uiso   1.00
O216   O     0.53640   0.56348   0.72252   0.00000  Uiso   1.00
C217   C     0.48953   0.58504   0.76906   0.00000  Uiso   1.00
O218   O     0.44069   0.60474   0.81288   0.00000  Uiso   1.00
O219   O     0.77057   0.71483   0.88345   0.00000  Uiso   1.00
C220   C     0.83262   0.73289   0.88950   0.00000  Uiso   1.00
O221   O     0.89868   0.74897   0.89803   0.00000  Uiso   1.00
O222   O     0.72558   0.97886   0.64166   0.00000  Uiso   1.00
C223   C     0.67602   0.94875   0.64274   0.00000  Uiso   1.00
O224   O     0.62704   0.91878   0.64524   0.00000  Uiso   1.00
O225   O    -0.05890   0.65016   0.51549   0.00000  Uiso   1.00
C226   C    -0.00161   0.67143   0.53272   0.00000  Uiso   1.00
O227   O     0.05633   0.69284   0.55241   0.00000  Uiso   1.00
O228   O     0.42963   0.90652   0.62012   0.00000  Uiso   1.00
C229   C     0.46517   0.93881   0.58282   0.00000  Uiso   1.00
O230   O     0.49611   0.97310   0.54965   0.00000  Uiso   1.00
O231   O     0.26789   0.73644   0.87928   0.00000  Uiso   1.00
C232   C     0.20643   0.75469   0.89498   0.00000  Uiso   1.00
O233   O     0.14356   0.77327   0.90686   0.00000  Uiso   1.00
O234   O     1.02225   0.84774   0.29709   0.00000  Uiso   1.00
C235   C     0.98007   0.81279   0.29936   0.00000  Uiso   1.00
O236   O     0.94372   0.77504   0.29338   0.00000  Uiso   1.00
O237   O     0.94193   0.65159   0.76807   0.00000  Uiso   1.00
C238   C     1.00317   0.66544   0.79013   0.00000  Uiso   1.00
O239   O     1.06583   0.67881   0.81457   0.00000  Uiso   1.00
O240   O     0.35101   0.51246   0.70764   0.00000  Uiso   1.00
C241   C     0.29137   0.50051   0.66506   0.00000  Uiso   1.00
O242   O     0.23266   0.49249   0.62561   0.00000  Uiso   1.00
C243   C     0.50743   0.93595   0.82802   0.00000  Uiso   1.00
O244   O     0.51646   0.90184   0.87938   0.00000  Uiso   1.00
O245   O     0.49352   0.96998   0.77843   0.00000  Uiso   1.00
O246   O     0.08143   0.85690   0.57647   0.00000  Uiso   1.00
C247   C     0.02377   0.84504   0.53640   0.00000  Uiso   1.00
O248   O    -0.03201   0.82968   0.49696   0.00000  Uiso   1.00
Sc249  Sc    0.00095   0.50187   0.50756   0.00000  Uiso   1.00
Sc250  Sc    0.50179   0.24975  -0.00001   0.00000  Uiso   1.00
Sc251  Sc    0.50288   0.25297   0.24855   0.00000  Uiso   1.00
Sc252  Sc    0.00196   0.50238   0.25538   0.00000  Uiso   1.00
O253   O     0.43040   0.30823   0.45495   0.00000  Uiso   1.00
O254   O     0.07028   0.06129   0.05036   0.00000  Uiso   1.00
O255   O     0.92020   0.44948   0.30182   0.00000  Uiso   1.00
O256   O     0.58369   0.19888   0.20414   0.00000  Uiso   1.00
O257   O     0.57935   0.19730   0.04911   0.00000  Uiso   1.00
O258   O     0.92840   0.44523   0.45511   0.00000  Uiso   1.00
O259   O     0.07450   0.05874   0.20331   0.00000  Uiso   1.00
O260   O     0.43273   0.31115   0.30146   0.00000  Uiso   1.00
C261   C     0.40176   0.32307   0.37861   0.00000  Uiso   1.00
C262   C     0.10162   0.07254   0.12814   0.00000  Uiso   1.00
C263   C     0.89642   0.43376   0.37895   0.00000  Uiso   1.00
C264   C     0.60977   0.18486   0.12681   0.00000  Uiso   1.00
C265   C     0.32792   0.35516   0.37962   0.00000  Uiso   1.00
C266   C     0.17067   0.10605   0.12463   0.00000  Uiso   1.00
C267   C     0.82983   0.39822   0.37782   0.00000  Uiso   1.00
C268   C     0.67760   0.15112   0.12825   0.00000  Uiso   1.00
C269   C     0.29552   0.36755   0.46134   0.00000  Uiso   1.00
C270   C     0.20236   0.12231   0.04057   0.00000  Uiso   1.00
C271   C     0.79340   0.38553   0.29309   0.00000  Uiso   1.00
C272   C     0.70909   0.13468   0.21472   0.00000  Uiso   1.00
C273   C     0.70804   0.13572   0.04384   0.00000  Uiso   1.00
C274   C     0.79781   0.38280   0.46086   0.00000  Uiso   1.00
C275   C     0.20564   0.12174   0.20978   0.00000  Uiso   1.00
C276   C     0.29688   0.37024   0.29541   0.00000  Uiso   1.00
H277   H     0.82557   0.39559   0.52297   0.00000  Uiso   1.00
H278   H     0.68010   0.14987  -0.01672   0.00000  Uiso   1.00
H279   H     0.32962   0.36113   0.23292   0.00000  Uiso   1.00
H280   H     0.17115   0.11506   0.26911   0.00000  Uiso   1.00
H281   H     0.17867   0.10779  -0.02254   0.00000  Uiso   1.00
H282   H     0.31637   0.35230   0.52483   0.00000  Uiso   1.00
H283   H     0.67823   0.14534   0.27914   0.00000  Uiso   1.00
H284   H     0.82301   0.40111   0.23216   0.00000  Uiso   1.00
O285   O     0.09561   0.45837   0.45870   0.00000  Uiso   1.00
O286   O     0.40409   0.20853   0.04891   0.00000  Uiso   1.00
O287   O     0.60156   0.29212   0.29538   0.00000  Uiso   1.00
O288   O     0.90182   0.04133   0.20986   0.00000  Uiso   1.00
O289   O     0.90484   0.03723   0.05412   0.00000  Uiso   1.00
O290   O     0.60026   0.28883   0.45234   0.00000  Uiso   1.00
O291   O     0.40993   0.20793   0.20214   0.00000  Uiso   1.00
O292   O     0.09145   0.45346   0.30233   0.00000  Uiso   1.00
C293   C     0.12291   0.44498   0.37923   0.00000  Uiso   1.00
C294   C     0.37934   0.19693   0.12670   0.00000  Uiso   1.00
C295   C     0.62899   0.30405   0.37477   0.00000  Uiso   1.00
C296   C     0.87716   0.05456   0.12974   0.00000  Uiso   1.00
C297   C     0.19621   0.41510   0.38021   0.00000  Uiso   1.00
C298   C     0.30641   0.16550   0.12662   0.00000  Uiso   1.00
C299   C     0.69700   0.33633   0.37568   0.00000  Uiso   1.00
C300   C     0.80627   0.08679   0.12767   0.00000  Uiso   1.00
C301   C     0.22926   0.39840   0.46492   0.00000  Uiso   1.00
C302   C     0.27392   0.14844   0.04451   0.00000  Uiso   1.00
C303   C     0.72858   0.35408   0.29309   0.00000  Uiso   1.00
C304   C     0.77863   0.10569   0.21222   0.00000  Uiso   1.00
C305   C     0.77704   0.10508   0.04544   0.00000  Uiso   1.00
C306   C     0.72838   0.35329   0.45868   0.00000  Uiso   1.00
C307   C     0.27527   0.14810   0.20987   0.00000  Uiso   1.00
C308   C     0.22907   0.39889   0.29509   0.00000  Uiso   1.00
H309   H     0.70406   0.33504   0.51671   0.00000  Uiso   1.00
H310   H     0.80404   0.09089  -0.01692   0.00000  Uiso   1.00
H311   H     0.20452   0.40879   0.23042   0.00000  Uiso   1.00
H312   H     0.29919   0.16288   0.27485   0.00000  Uiso   1.00
H313   H     0.30520   0.16052  -0.01476   0.00000  Uiso   1.00
H314   H     0.20184   0.41112   0.53089   0.00000  Uiso   1.00
H315   H     0.80237   0.09165   0.27586   0.00000  Uiso   1.00
H316   H     0.70130   0.34164   0.23144   0.00000  Uiso   1.00
O317   O     0.00061   0.53857   0.38043   0.00000  Uiso   1.00
O318   O     0.50469   0.28984   0.12680   0.00000  Uiso   1.00
O319   O     0.48632   0.21383   0.37747   0.00000  Uiso   1.00
O320   O     0.01921   0.46521   0.62937   0.00000  Uiso   1.00
H321   H     0.43863   0.19362   0.37609   0.00000  Uiso   1.00
H322   H     0.48962   0.32460   0.11184   0.00000  Uiso   1.00
H323   H     0.05587   0.43913   0.64224   0.00000  Uiso   1.00
H324   H     0.01922   0.57219   0.38482   0.00000  Uiso   1.00
O325   O     0.44424   0.09495   0.51899   0.00000  Uiso   1.00
C326   C     0.50409   0.08900   0.47826   0.00000  Uiso   1.00
O327   O     0.56364   0.08220   0.44008   0.00000  Uiso   1.00
O328   O     0.35612   0.50100   0.45687   0.00000  Uiso   1.00
C329   C     0.30847   0.52331   0.41695   0.00000  Uiso   1.00
O330   O     0.25768   0.54530   0.37783   0.00000  Uiso   1.00
O331   O     0.13549   0.26208   0.20109   0.00000  Uiso   1.00
C332   C     0.19085   0.27083   0.15514   0.00000  Uiso   1.00
O333   O     0.24724   0.28207   0.11011   0.00000  Uiso   1.00
O334   O     0.75852   0.26686   0.14417   0.00000  Uiso   1.00
C335   C     0.81426   0.25253   0.10643   0.00000  Uiso   1.00
O336   O     0.86571   0.23469   0.06400   0.00000  Uiso   1.00
O337   O     0.74782   0.01663   0.34784   0.00000  Uiso   1.00
C338   C     0.70037  -0.00186   0.39527   0.00000  Uiso   1.00
O339   O     0.65969  -0.02803   0.44142   0.00000  Uiso   1.00
O340   O     0.53308   0.07333   0.19775   0.00000  Uiso   1.00
C341   C     0.48291   0.08817   0.24950   0.00000  Uiso   1.00
O342   O     0.43388   0.10485   0.29509   0.00000  Uiso   1.00
O343   O     0.75210   0.21698   0.38750   0.00000  Uiso   1.00
C344   C     0.81350   0.22912   0.35431   0.00000  Uiso   1.00
O345   O     0.87270   0.24238   0.32412   0.00000  Uiso   1.00
O346   O     0.62346   0.41939   0.14918   0.00000  Uiso   1.00
C347   C     0.67822   0.44636   0.13698   0.00000  Uiso   1.00
O348   O     0.73428   0.47213   0.12459   0.00000  Uiso   1.00
O349   O    -0.04877   0.14727  -0.03040   0.00000  Uiso   1.00
C350   C    -0.00274   0.17112   0.01099   0.00000  Uiso   1.00
O351   O     0.04885   0.19416   0.04984   0.00000  Uiso   1.00
O352   O     0.43720   0.40075   0.10909   0.00000  Uiso   1.00
C353   C     0.46494   0.43926   0.08195   0.00000  Uiso   1.00
O354   O     0.49182   0.47805   0.05679   0.00000  Uiso   1.00
O355   O     0.25161   0.23687   0.36125   0.00000  Uiso   1.00
C356   C     0.19682   0.25075   0.40327   0.00000  Uiso   1.00
O357   O     0.14369   0.26648   0.44781   0.00000  Uiso   1.00
O358   O     1.04332   0.34583  -0.20601   0.00000  Uiso   1.00
C359   C     0.99096   0.33200  -0.25265   0.00000  Uiso   1.00
O360   O     0.93719   0.31995  -0.29850   0.00000  Uiso   1.00
O361   O     0.95014   0.15890   0.21433   0.00000  Uiso   1.00
C362   C     1.00170   0.16213   0.26658   0.00000  Uiso   1.00
O363   O     1.05155   0.16781   0.32196   0.00000  Uiso   1.00
O364   O     0.35143   0.01132   0.20125   0.00000  Uiso   1.00
C365   C     0.29542   0.00175   0.16004   0.00000  Uiso   1.00
O366   O     0.23931  -0.00798   0.11513   0.00000  Uiso   1.00
C367   C     0.49669   0.43265   0.32999   0.00000  Uiso   1.00
O368   O     0.52531   0.40232   0.37795   0.00000  Uiso   1.00
O369   O     0.46639   0.46510   0.28554   0.00000  Uiso   1.00
O370   O     0.06838   0.35751   0.06938   0.00000  Uiso   1.00
C371   C     0.01728   0.34293   0.02056   0.00000  Uiso   1.00
O372   O    -0.03593   0.32613  -0.02228   0.00000  Uiso   1.00
Sc373  Sc    0.00222   0.50039   1.00643   0.00000  Uiso   1.00
Sc374  Sc    0.50278   0.25110   0.49995   0.00000  Uiso   1.00
Sc375  Sc    0.50111   0.25209   0.75096   0.00000  Uiso   1.00
Sc376  Sc    0.00107   0.50270   0.75510   0.00000  Uiso   1.00
O377   O     0.43040   0.30936   0.95307   0.00000  Uiso   1.00
O378   O     0.06938   0.06313   0.55511   0.00000  Uiso   1.00
O379   O     0.92189   0.44692   0.80464   0.00000  Uiso   1.00
O380   O     0.58402   0.19567   0.70446   0.00000  Uiso   1.00
O381   O     0.58180   0.19491   0.54927   0.00000  Uiso   1.00
O382   O     0.92613   0.44546   0.95793   0.00000  Uiso   1.00
O383   O     0.07539   0.06086   0.71136   0.00000  Uiso   1.00
O384   O     0.43064   0.31071   0.79646   0.00000  Uiso   1.00
C385   C     0.40204   0.32205   0.87603   0.00000  Uiso   1.00
C386   C     0.10077   0.07274   0.63173   0.00000  Uiso   1.00
C387   C     0.89717   0.43306   0.88171   0.00000  Uiso   1.00
C388   C     0.61095   0.18268   0.62606   0.00000  Uiso   1.00
C389   C     0.33084   0.35532   0.87849   0.00000  Uiso   1.00
C390   C     0.17277   0.10663   0.62670   0.00000  Uiso   1.00
C391   C     0.82686   0.40064   0.87936   0.00000  Uiso   1.00
C392   C     0.68004   0.15087   0.62736   0.00000  Uiso   1.00
C393   C     0.29725   0.36934   0.96166   0.00000  Uiso   1.00
C394   C     0.20672   0.12005   0.54148   0.00000  Uiso   1.00
C395   C     0.79272   0.38545   0.79211   0.00000  Uiso   1.00
C396   C     0.70852   0.13423   0.71125   0.00000  Uiso   1.00
C397   C     0.70927   0.13261   0.54220   0.00000  Uiso   1.00
C398   C     0.79698   0.38224   0.96199   0.00000  Uiso   1.00
C399   C     0.20469   0.12226   0.70856   0.00000  Uiso   1.00
C400   C     0.29245   0.36833   0.79392   0.00000  Uiso   1.00
H401   H     0.82520   0.39689   1.02589   0.00000  Uiso   1.00
H402   H     0.68380   0.14840   0.48064   0.00000  Uiso   1.00
H403   H     0.31840   0.35583   0.73288   0.00000  Uiso   1.00
H404   H     0.17701   0.11283   0.77334   0.00000  Uiso   1.00
H405   H     0.17801   0.10819   0.47908   0.00000  Uiso   1.00
H406   H     0.32809   0.36026   1.02207   0.00000  Uiso   1.00
H407   H     0.68682   0.15189   0.77293   0.00000  Uiso   1.00
H408   H     0.81702   0.39683   0.72398   0.00000  Uiso   1.00
O409   O     0.09719   0.45762   0.95988   0.00000  Uiso   1.00
O410   O     0.40841   0.20559   0.54729   0.00000  Uiso   1.00
O411   O     0.59654   0.29326   0.80127   0.00000  Uiso   1.00
O412   O     0.90370   0.04050   0.70671   0.00000  Uiso   1.00
O413   O     0.90331   0.03980   0.55286   0.00000  Uiso   1.00
O414   O     0.60485   0.28912   0.95709   0.00000  Uiso   1.00
O415   O     0.40925   0.20639   0.70291   0.00000  Uiso   1.00
O416   O     0.09016   0.45474   0.80411   0.00000  Uiso   1.00
C417   C     0.12251   0.44533   0.87980   0.00000  Uiso   1.00
C418   C     0.38056   0.19529   0.62586   0.00000  Uiso   1.00
C419   C     0.62893   0.30347   0.87958   0.00000  Uiso   1.00
C420   C     0.87525   0.05515   0.62992   0.00000  Uiso   1.00
C421   C     0.19166   0.41146   0.87840   0.00000  Uiso   1.00
C422   C     0.30538   0.16518   0.62679   0.00000  Uiso   1.00
C423   C     0.69983   0.33610   0.87862   0.00000  Uiso   1.00
C424   C     0.80714   0.08751   0.62947   0.00000  Uiso   1.00
C425   C     0.22429   0.39572   0.96221   0.00000  Uiso   1.00
C426   C     0.27244   0.15009   0.54352   0.00000  Uiso   1.00
C427   C     0.72967   0.35188   0.79408   0.00000  Uiso   1.00
C428   C     0.77449   0.10440   0.71186   0.00000  Uiso   1.00
C429   C     0.77526   0.10129   0.54555   0.00000  Uiso   1.00
C430   C     0.73141   0.35083   0.96285   0.00000  Uiso   1.00
C431   C     0.27281   0.15093   0.70899   0.00000  Uiso   1.00
C432   C     0.22508   0.39798   0.79341   0.00000  Uiso   1.00
H433   H     0.70529   0.33905   1.02527   0.00000  Uiso   1.00
H434   H     0.80077   0.08986   0.47976   0.00000  Uiso   1.00
H435   H     0.20855   0.41664   0.72616   0.00000  Uiso   1.00
H436   H     0.29858   0.16100   0.77552   0.00000  Uiso   1.00
H437   H     0.29856   0.16267   0.48096   0.00000  Uiso   1.00
H438   H     0.20085   0.41050   1.02446   0.00000  Uiso   1.00
H439   H     0.79902   0.09193   0.77833   0.00000  Uiso   1.00
H440   H     0.69666   0.33919   0.73476   0.00000  Uiso   1.00
O441   O     0.00127   0.54007   0.88150   0.00000  Uiso   1.00
O442   O     0.50154   0.28823   0.62583   0.00000  Uiso   1.00
O443   O     0.48775   0.21323   0.87622   0.00000  Uiso   1.00
O444   O     0.01475   0.46357   1.13206   0.00000  Uiso   1.00
H445   H     0.45134   0.18509   0.86712   0.00000  Uiso   1.00
H446   H     0.47389   0.32029   0.62031   0.00000  Uiso   1.00
H447   H     0.04506   0.43263   1.13522   0.00000  Uiso   1.00
H448   H     0.01689   0.57440   0.87315   0.00000  Uiso   1.00
O449   O     0.45031   0.09469   1.02125   0.00000  Uiso   1.00
C450   C     0.50993   0.08486   0.98311   0.00000  Uiso   1.00
O451   O     0.56898   0.07143   0.94586   0.00000  Uiso   1.00
O452   O     0.35425   0.50562   0.93412   0.00000  Uiso   1.00
C453   C     0.29722   0.52317   0.90173   0.00000  Uiso   1.00
O454   O     0.23583   0.53916   0.87696   0.00000  Uiso   1.00
O455   O     0.13785   0.26088   0.69225   0.00000  Uiso   1.00
C456   C     0.19636   0.27201   0.65369   0.00000  Uiso   1.00
O457   O     0.25843   0.28629   0.62192   0.00000  Uiso   1.00
O458   O     0.74462   0.26496   0.64403   0.00000  Uiso   1.00
C459   C     0.80260   0.24720   0.60852   0.00000  Uiso   1.00
O460   O     0.85723   0.22460   0.58098   0.00000  Uiso   1.00
O461   O     0.76785   0.02021   0.88317   0.00000  Uiso   1.00
C462   C     0.71035  -0.00526   0.88192   0.00000  Uiso   1.00
O463   O     0.65318  -0.02912   0.87642   0.00000  Uiso   1.00
O464   O     0.53820   0.07145   0.68725   0.00000  Uiso   1.00
C465   C     0.48833   0.08455   0.74016   0.00000  Uiso   1.00
O466   O     0.44380   0.09861   0.79601   0.00000  Uiso   1.00
O467   O     0.76213   0.21801   0.88034   0.00000  Uiso   1.00
C468   C     0.82657   0.23304   0.86334   0.00000  Uiso   1.00
O469   O     0.88993   0.24637   0.84629   0.00000  Uiso   1.00
O470   O     0.69578   0.49885   0.70178   0.00000  Uiso   1.00
C471   C     0.68922   0.48135   0.62746   0.00000  Uiso   1.00
O472   O     0.67989   0.46115   0.55512   0.00000  Uiso   1.00
O473   O    -0.07003   0.14903   0.45560   0.00000  Uiso   1.00
C474   C    -0.01940   0.16628   0.50215   0.00000  Uiso   1.00
O475   O     0.03205   0.18252   0.54838   0.00000  Uiso   1.00
O476   O     0.43195   0.40519   0.61750   0.00000  Uiso   1.00
C477   C     0.46802   0.43684   0.57845   0.00000  Uiso   1.00
O478   O     0.50366   0.47007   0.54570   0.00000  Uiso   1.00
O479   O     0.24281   0.23509   0.86904   0.00000  Uiso   1.00
C480   C     0.18802   0.25454   0.90437   0.00000  Uiso   1.00
O481   O     0.13355   0.27353   0.93952   0.00000  Uiso   1.00
O482   O     1.03871   0.34575   0.31323   0.00000  Uiso   1.00
C483   C     0.99069   0.33368   0.25745   0.00000  Uiso   1.00
O484   O     0.93620   0.32534   0.20703   0.00000  Uiso   1.00
O485   O     0.94463   0.16052   0.72334   0.00000  Uiso   1.00
C486   C     1.00374   0.16155   0.76472   0.00000  Uiso   1.00
O487   O     1.05936   0.17005   0.81228   0.00000  Uiso   1.00
O488   O     0.34307   0.01810   0.69203   0.00000  Uiso   1.00
C489   C     0.28433   0.00088   0.65775   0.00000  Uiso   1.00
O490   O     0.22772  -0.01071   0.62023   0.00000  Uiso   1.00
C491   C     0.53793   0.41240   0.81110   0.00000  Uiso   1.00
O492   O     0.50016   0.40970   0.87974   0.00000  Uiso   1.00
O493   O     0.57271   0.41941   0.74248   0.00000  Uiso   1.00
O494   O     0.06470   0.35249   0.55868   0.00000  Uiso   1.00
C495   C     0.01318   0.33014   0.51987   0.00000  Uiso   1.00
O496   O    -0.04001   0.31002   0.48200   0.00000  Uiso   1.00
#===END of data_lp(17.6)_AIMD

data_lp-Imma_CO2-P1
_symmetry_space_group_name_H-M    'P1'
_symmetry_Int_Tables_number       1
loop_
_symmetry_equiv_pos_as_xyz
  x,y,z
_cell_length_a                    7.3090
_cell_length_b                    17.0270
_cell_length_c                    13.5123
_cell_angle_alpha                 90.0000
_cell_angle_beta                  90.0000
_cell_angle_gamma                 90.0000
loop_
_atom_site_label
_atom_site_type_symbol
_atom_site_fract_x
_atom_site_fract_y
_atom_site_fract_z
_atom_site_U_iso_or_equiv
_atom_site_adp_type
_atom_site_occupancy
O1     O     0.14795   0.16528   0.84238   0.00000  Uiso   1.00
C2     C     0.82813   0.03544   0.96711   0.00000  Uiso   1.00
H3     H     0.69725   0.05972   0.94522   0.00000  Uiso   1.00
O4     O     0.64861   0.66529   0.34262   0.00000  Uiso   1.00
C5     C     0.32847   0.53326   0.46338   0.00000  Uiso   1.00
H6     H     0.19798   0.55504   0.43714   0.00000  Uiso   1.00
O7     O     0.83920   0.34051   0.84295   0.00000  Uiso   1.00
C8     C     0.15945   0.47184   0.96482   0.00000  Uiso   1.00
H9     H     0.29022   0.44815   0.94178   0.00000  Uiso   1.00
O10    O     0.34020   0.83957   0.34391   0.00000  Uiso   1.00
C11    C     0.65957   0.96750   0.47219   0.00000  Uiso   1.00
H12    H     0.79043   0.94315   0.45049   0.00000  Uiso   1.00
O13    O     0.84013   0.66593   0.15535   0.00000  Uiso   1.00
C14    C     0.15954   0.53894   0.02572   0.00000  Uiso   1.00
H15    H     0.29032   0.56377   0.04663   0.00000  Uiso   1.00
O16    O     0.33888   0.16432   0.65754   0.00000  Uiso   1.00
C17    C     0.65938   0.03412   0.53392   0.00000  Uiso   1.00
H18    H     0.79014   0.05789   0.55687   0.00000  Uiso   1.00
O19    O     0.14884   0.84024   0.15513   0.00000  Uiso   1.00
C20    C     0.82831   0.96860   0.02851   0.00000  Uiso   1.00
H21    H     0.69766   0.94449   0.05091   0.00000  Uiso   1.00
O22    O     0.64813   0.34075   0.65639   0.00000  Uiso   1.00
C23    C     0.32855   0.46651   0.52492   0.00000  Uiso   1.00
H24    H     0.19815   0.43995   0.54305   0.00000  Uiso   1.00
O25    O     0.83866   0.83977   0.15482   0.00000  Uiso   1.00
C26    C     0.15822   0.96817   0.02753   0.00000  Uiso   1.00
H27    H     0.28896   0.94368   0.04909   0.00000  Uiso   1.00
O28    O     0.33808   0.33928   0.65402   0.00000  Uiso   1.00
C29    C     0.65773   0.47234   0.53471   0.00000  Uiso   1.00
H30    H     0.78809   0.45113   0.56184   0.00000  Uiso   1.00
O31    O     0.15012   0.66640   0.15417   0.00000  Uiso   1.00
C32    C     0.82964   0.53818   0.02732   0.00000  Uiso   1.00
H33    H     0.69895   0.56220   0.04992   0.00000  Uiso   1.00
O34    O     0.64891   0.16500   0.65687   0.00000  Uiso   1.00
C35    C     0.32934   0.03434   0.53314   0.00000  Uiso   1.00
H36    H     0.19842   0.05839   0.55536   0.00000  Uiso   1.00
O37    O     0.14918   0.34103   0.84186   0.00000  Uiso   1.00
C38    C     0.82948   0.47123   0.96609   0.00000  Uiso   1.00
H39    H     0.69861   0.44700   0.94413   0.00000  Uiso   1.00
O40    O     0.65045   0.84005   0.34376   0.00000  Uiso   1.00
C41    C     0.32961   0.96777   0.47126   0.00000  Uiso   1.00
H42    H     0.19893   0.94386   0.44844   0.00000  Uiso   1.00
O43    O     0.83800   0.16513   0.84227   0.00000  Uiso   1.00
C44    C     0.15814   0.03485   0.96591   0.00000  Uiso   1.00
H45    H     0.28894   0.05862   0.94299   0.00000  Uiso   1.00
O46    O     0.33854   0.66455   0.34108   0.00000  Uiso   1.00
C47    C     0.65778   0.53874   0.47261   0.00000  Uiso   1.00
H48    H     0.78822   0.56522   0.45436   0.00000  Uiso   1.00
Sc49   Sc    0.24438   0.25292   0.74949   0.00000  Uiso   1.00
Sc50   Sc    0.74347   0.25317   0.74959   0.00000  Uiso   1.00
Sc51   Sc    0.74460   0.75296   0.24953   0.00000  Uiso   1.00
Sc52   Sc    0.24484   0.75313   0.24884   0.00000  Uiso   1.00
C53    C    -0.00692   0.07012   0.93439   0.00000  Uiso   1.00
C54    C    -0.00700   0.13687   0.87028   0.00000  Uiso   1.00
C55    C     0.49317   0.57067   0.43535   0.00000  Uiso   1.00
C56    C     0.49344   0.63688   0.37029   0.00000  Uiso   1.00
C57    C    -0.00560   0.43622   0.93392   0.00000  Uiso   1.00
C58    C    -0.00574   0.36915   0.87029   0.00000  Uiso   1.00
C59    C     0.49476   0.93313   0.43879   0.00000  Uiso   1.00
C60    C     0.49516   0.86753   0.37275   0.00000  Uiso   1.00
C61    C    -0.00529   0.57299   0.05957   0.00000  Uiso   1.00
C62    C    -0.00500   0.63846   0.12579   0.00000  Uiso   1.00
C63    C     0.49424   0.06927   0.56555   0.00000  Uiso   1.00
C64    C     0.49400   0.13620   0.62942   0.00000  Uiso   1.00
C65    C    -0.00664   0.93378   0.06075   0.00000  Uiso   1.00
C66    C    -0.00638   0.86785   0.12626   0.00000  Uiso   1.00
C67    C     0.49319   0.43456   0.56214   0.00000  Uiso   1.00
C68    C     0.49313   0.36816   0.62691   0.00000  Uiso   1.00
O69    O     1.07350   0.11675   0.34816   0.00000  Uiso   1.00
C70    C     1.00212   0.06287   0.31262   0.00000  Uiso   1.00
O71    O     0.93063   0.00904   0.27702   0.00000  Uiso   1.00
O72    O     0.38334   0.30993   0.32335   0.00000  Uiso   1.00
C73    C     0.32685   0.27805   0.39286   0.00000  Uiso   1.00
O74    O     0.27051   0.24619   0.46231   0.00000  Uiso   1.00
O75    O     1.28063   0.82453   0.64000   0.00000  Uiso   1.00
C76    C     1.24420   0.76501   0.60314   0.00000  Uiso   1.00
O77    O     1.20782   0.70554   0.56617   0.00000  Uiso   1.00
O78    O     0.88204   0.62612   0.71974   0.00000  Uiso   1.00
C79    C     0.97112   0.56986   0.71560   0.00000  Uiso   1.00
O80    O     1.06017   0.51354   0.71148   0.00000  Uiso   1.00
O81    O     0.50386   0.11792   0.30089   0.00000  Uiso   1.00
C82    C     0.49610   0.06392   0.24880   0.00000  Uiso   1.00
O83    O     0.48832   0.00984   0.19666   0.00000  Uiso   1.00
O84    O     0.74468   0.21288   0.44005   0.00000  Uiso   1.00
C85    C     0.81929   0.27298   0.43725   0.00000  Uiso   1.00
O86    O     0.89368   0.33306   0.43448   0.00000  Uiso   1.00
O87    O     0.58922   0.39644   0.15027   0.00000  Uiso   1.00
C88    C     0.50741   0.44837   0.18392   0.00000  Uiso   1.00
O89    O     0.42548   0.50026   0.21764   0.00000  Uiso   1.00
O90    O     0.79047   0.73276   0.92715   0.00000  Uiso   1.00
C91    C     0.92608   0.76082   0.89990   0.00000  Uiso   1.00
O92    O     1.06150   0.78888   0.87262   0.00000  Uiso   1.00
O93    O     0.48029   0.86018   0.88045   0.00000  Uiso   1.00
C94    C     0.49370   0.91565   0.83116   0.00000  Uiso   1.00
O95    O     0.50710   0.97106   0.78179   0.00000  Uiso   1.00
O96    O     0.96107   0.48923   0.29305   0.00000  Uiso   1.00
C97    C     1.00139   0.43525   0.24542   0.00000  Uiso   1.00
O98    O     1.04188   0.38131   0.19778   0.00000  Uiso   1.00
O99    O     0.71058   0.74408   0.55693   0.00000  Uiso   1.00
C100   C     0.75605   0.79481   0.60874   0.00000  Uiso   1.00
O101   O     0.80146   0.84557   0.66047   0.00000  Uiso   1.00
O102   O     0.40144   0.65390   0.83509   0.00000  Uiso   1.00
C103   C     0.45340   0.59296   0.80909   0.00000  Uiso   1.00
O104   O     0.50520   0.53195   0.78316   0.00000  Uiso   1.00
O105   O     0.73451   0.24189   0.03518   0.00000  Uiso   1.00
C106   C     0.77255   0.22796   0.11671   0.00000  Uiso   1.00
O107   O     0.81062   0.21410   0.19814   0.00000  Uiso   1.00
O108   O     0.21882   0.17606   0.12688   0.00000  Uiso   1.00
C109   C     0.26279   0.23231   0.08474   0.00000  Uiso   1.00
O110   O     0.30679   0.28857   0.04253   0.00000  Uiso   1.00
O111   O     0.00000   0.25000   0.67402   0.00000  Uiso   1.00
H112   H     0.00000   0.25000   0.60074   0.00000  Uiso   1.00
O113   O     0.00000   0.75000   0.32598   0.00000  Uiso   1.00
H114   H     0.00000   0.75000   0.39926   0.00000  Uiso   1.00
O115   O     0.50000   0.75000   0.17402   0.00000  Uiso   1.00
H116   H     0.50000   0.75000   0.10074   0.00000  Uiso   1.00
O117   O     0.50000   0.25000   0.82598   0.00000  Uiso   1.00
H118   H     0.50000   0.25000   0.89926   0.00000  Uiso   1.00
#===END of data_lp-Imma_CO2-P1
